# Supplementary material for: Synthesis of Alkenylgold(I) Complexes Relevant to Catalytic Carboxylative Cyclization of Unsaturated Amines and Alcohols
Source: MDPI journal article supplement (doi:10.3390/molecules29061331), 2024-03-16
Supplement: s1 [file s1]

# Supplementary Materials

## Synthesis of Alkenylgold(I) Complexes Relevant to Catalytic Carboxylative Cyclization of Unsaturated Amines and Alcohols

Shun Hase, Kyohei Yamashita, and Yoshihito Kayaki\*

Department of Chemical Science and Engineering, School of Materials and Chemical Technology,  
Tokyo Institute of Technology, 2-12-1-E4-1 O-okayama, Meguro-ku Tokyo 152-8552, Japan

\*E-mail: ykayaki@o.cc.titech.ac.jp

### Contents

|                             | Page |
|-----------------------------|------|
| X-ray Crystallographic Data | S2   |

## X-ray Crystallographic Data

**Table S1.** Crystallographic data for **7**, **9**, and **11**

|                                            | <b>7</b>                                                                                                                                     | <b>9</b>                                                                                                            | <b>11</b>                                                                                                                                    |
|--------------------------------------------|----------------------------------------------------------------------------------------------------------------------------------------------|---------------------------------------------------------------------------------------------------------------------|----------------------------------------------------------------------------------------------------------------------------------------------|
| Empirical Formula                          | C <sub>45</sub> H <sub>52</sub> AuN <sub>3</sub> O <sub>2</sub>                                                                              | C <sub>32</sub> H <sub>41</sub> AuN <sub>2</sub> O <sub>3</sub>                                                     | C <sub>32</sub> H <sub>41</sub> AuN <sub>2</sub> O <sub>3</sub>                                                                              |
| Formula Weight                             | 863.89                                                                                                                                       | 698.65                                                                                                              | 698.65                                                                                                                                       |
| Crystal Color, Habit                       | colorless, prism                                                                                                                             | colorless, prism                                                                                                    | colorless, prism                                                                                                                             |
| Crystal System                             | monoclinic                                                                                                                                   | orthorhombic                                                                                                        | monoclinic                                                                                                                                   |
| Space Group                                | <i>P</i> 2 <sub>1</sub> / <i>n</i> (#14)                                                                                                     | <i>Pbca</i> (#61)                                                                                                   | <i>P</i> 2 <sub>1</sub> / <i>n</i> (#14)                                                                                                     |
| Lattice Parameters                         | <i>a</i> = 12.504(2) Å<br><i>b</i> = 19.815(4) Å<br><i>c</i> = 16.172(3) Å<br><i>β</i> = 97.681(2) °<br><i>V</i> = 3970.8(12) Å <sup>3</sup> | <i>a</i> = 15.729(2) Å<br><i>b</i> = 17.415 (2) Å<br><i>c</i> = 22.599(3) Å<br><i>V</i> = 6190.7(10) Å <sup>3</sup> | <i>a</i> = 10.153(3) Å<br><i>b</i> = 16.657(4) Å<br><i>c</i> = 18.566(4) Å<br><i>β</i> = 95.620(4) °<br><i>V</i> = 3165.0(13) Å <sup>3</sup> |
| Z value                                    | 4                                                                                                                                            | 8                                                                                                                   | 4                                                                                                                                            |
| <i>D</i> <sub>calc</sub>                   | 1.445 g/cm <sup>3</sup>                                                                                                                      | 1.499 g/cm <sup>3</sup>                                                                                             | 1.485 g/cm <sup>3</sup>                                                                                                                      |
| <i>F</i> <sub>000</sub>                    | 1752.00                                                                                                                                      | 2800.00                                                                                                             | 1400.00                                                                                                                                      |
| μ(MoKα)                                    | 37.576 cm <sup>-1</sup>                                                                                                                      | 48.019 cm <sup>-1</sup>                                                                                             | 47.563 cm <sup>-1</sup>                                                                                                                      |
| Exposure Rate                              | 10.0 sec./°                                                                                                                                  | 16.0 sec./°                                                                                                         | 16.0 sec./°                                                                                                                                  |
| No. of Reflections Measured                | 32619                                                                                                                                        | 48693                                                                                                               | 25391                                                                                                                                        |
| No. of Unique Reflections                  | 8978                                                                                                                                         | 7068                                                                                                                | 7030                                                                                                                                         |
| No. Variables                              | 512                                                                                                                                          | 384                                                                                                                 | 343                                                                                                                                          |
| <i>R</i> 1 ( <i>I</i> > 2.00σ( <i>I</i> )) | 0.0581                                                                                                                                       | 0.0310                                                                                                              | 0.0484                                                                                                                                       |
| w <i>R</i> 2 (All Reflections)             | 0.1345                                                                                                                                       | 0.0897                                                                                                              | 0.1322                                                                                                                                       |
| Max Shift/Error in Final Cycle             | 0.000                                                                                                                                        | 0.000                                                                                                               | 0.002                                                                                                                                        |
| GOF on <i>F</i> <sup>2</sup>               | 1.000                                                                                                                                        | 1.000                                                                                                               | 0.894                                                                                                                                        |

$$R1 = \Sigma ||F_o| - |F_c|| / \Sigma |F_o|, wR2 = [ \Sigma ( w (F_o^2 - F_c^2)^2 ) / \Sigma w(F_o^2)^2 ]^{1/2}.$$

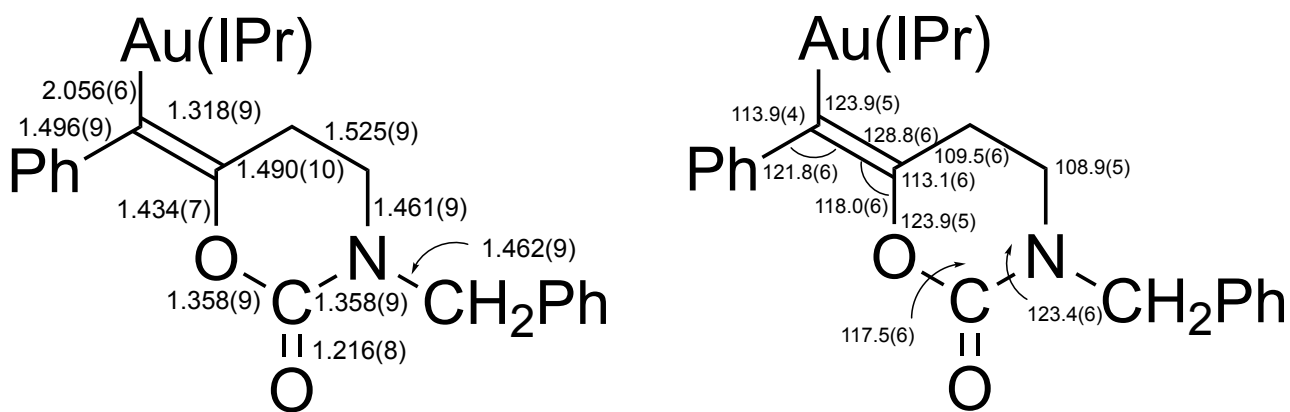

**Figure S1.** Selected bond lengths (Å; left) and angles (°; right) for 7.

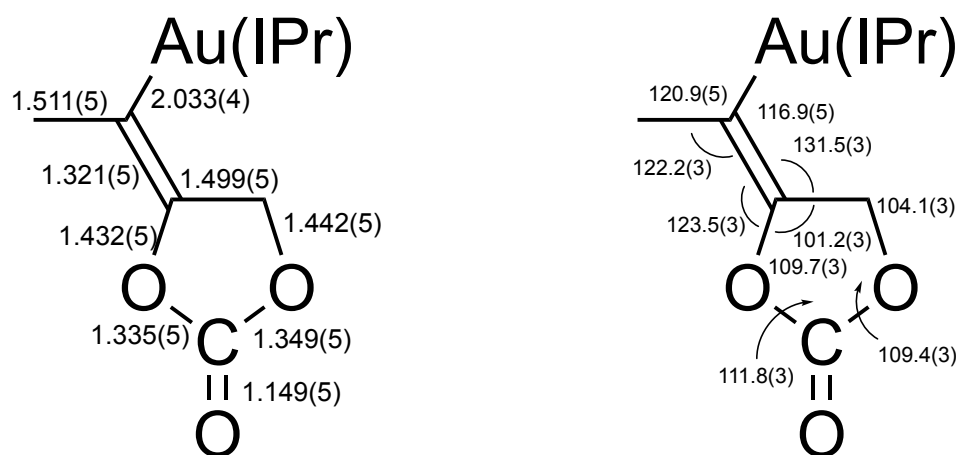

**Figure S2.** Selected bond lengths (Å; left) and angles (°; right) for 9.

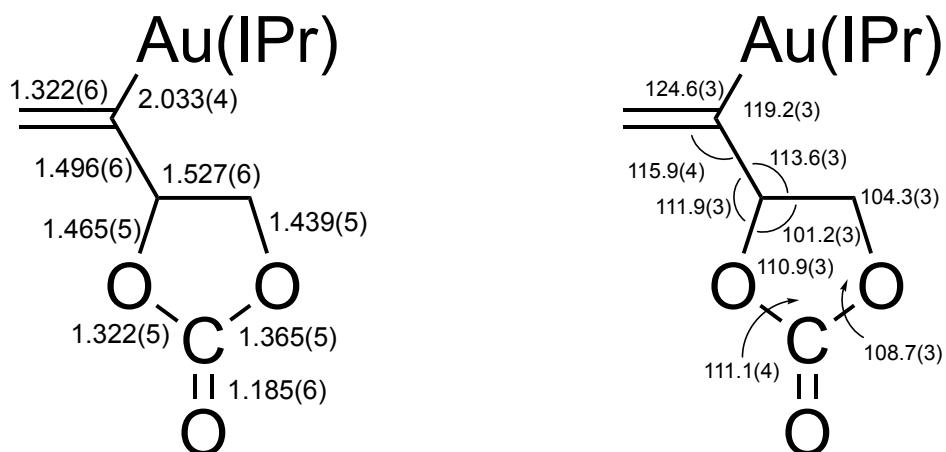

**Figure S3.** Selected bond lengths (Å) and angles (°) for **11**.
