# Supplementary material for: Synthesis of Alkenylgold(I) Complexes Relevant to Catalytic Carboxylative Cyclization of Unsaturated Amines and Alcohols
Source: Molecules. 2024 Mar 16;29(6):1331. doi: 10.3390/molecules29061331 (PMC10975222; doi:10.3390/molecules29061331)
Supplement: Supplementary file 1 [file molecules-29-01331-s001.zip]

Archive with 7 entries (7 files):
- CIF11.cif
- CIF7.cif
- CIF9.cif
- File S1-7-checkcif.pdf
- File S2-9-checkcif.pdf
- File S3-11-checkcif.pdf
- molecules-2913977-Supplementary Materials.pdf
