# Supplementary material for: Synthesis of Alkenylgold(I) Complexes Relevant to Catalytic Carboxylative Cyclization of Unsaturated Amines and Alcohols
Source: Molecules. 2024 Mar 16;29(6):1331. doi: 10.3390/molecules29061331 (PMC10975222; doi:10.3390/molecules29061331)
Supplement: Supplementary file 1 [file molecules-29-01331-s001.zip › CIF7.cif]

data_General
_audit_creation_date                    2014-03-13
_audit_creation_method                 'by CrystalStructure 4.0'
_audit_update_record                    ?

#==============================================================================
# PROCESSING SUMMARY (IUCr Office Use Only)

_journal_date_recd_electronic           ?
_journal_date_from_coeditor             ?
_journal_date_accepted                  ?
_journal_coeditor_code                  ?

#==============================================================================
# SUBMISSION DETAILS

_publ_contact_author_name              'ENTER NAME'
_publ_contact_author_email             'ENTER EMAIL ADDRESS'
_publ_contact_author_fax               'ENTER FAX NUMBER'
_publ_contact_author_phone             'ENTER PHONE NUMBER'
_publ_contact_letter
;
    ENTER TEXT OF LETTER
;
_publ_requested_journal                'ENTER JOURNAL NAME HERE'
_publ_requested_category               'CHOOSE FI FM FO CI CM CO or AD'
_publ_requested_coeditor_name           ?

#==============================================================================
# TITLE AND AUTHOR LIST

_publ_section_title
;
    ENTER SECTION TITLE
;
_publ_section_title_footnote
;
    ENTER FOOTNOTE TO TITLE OF PAPER
;
loop_
_publ_author_name
_publ_author_footnote
_publ_author_address
' FIRST AUTHORS NAME '
;
  FIRST AUTHORS FOOTNOTES
;
;
  FIRST AUTHORS ADDRESS
;
_publ_section_synopsis
;
    ENTER SYNOPSIS
;

#==============================================================================
# TEXT

_publ_section_abstract
;
    ENTER ABSTRACT
;
_publ_section_comment
;
    ENTER TEXT
;
_publ_section_references
;
    ENTER OTHER REFERENCES

    Rigaku (2010). CrystalStructure. Version 4.0. 
    Rigaku Corporation, Tokyo, Japan.

    Altomare, A., Burla, M., Camalli, M., Cascarano, G., 
    Giacovazzo, C., Guagliardi, A., Moliterni, A., Polidori, 
    G., and Spagna, R. (1999). J. Appl. Cryst., 32, 115-119. 
    SIR97

    Carruthers, J.R., Rollett,J.S., Betteridge, P.W.,
	 Kinna, D., Pearce, L., Larsen, A., and Gabe, E.(1999)
    CRYSTALS Issue 11, Chemical Crystallography Laboratory, Oxford, UK.

    Rigaku (1998). REQAB. 
    Rigaku Corporation, Tokyo, Japan.

;
_publ_section_figure_captions
;
    ENTER FIGURE CAPTIONS
;
_publ_section_exptl_prep
;
    ENTER COMPOUND PREPARATION DETAILS
;
_publ_section_exptl_refinement
;
    ENTER SPECIAL DETAILS OF THE REFINEMENT
;

#==============================================================================
data_Au-6membered-carbamatev7

#==============================================================================
# CHEMICAL DATA

_chemical_formula_sum                  'C45 H52 Au N3 O2'
_chemical_formula_moiety               'C45 H52 Au N3 O2'
_chemical_formula_weight                863.89
_chemical_melting_point                 ?

#==============================================================================
# CRYSTAL DATA
_symmetry_cell_setting                  monoclinic
_symmetry_space_group_name_H-M         'P 1 21/n 1'
_symmetry_space_group_name_Hall        '-P 2yn'
_symmetry_Int_Tables_number             14
loop_
_symmetry_equiv_pos_site_id
_symmetry_equiv_pos_as_xyz
1   '+X,+Y,+Z'
2   '1/2-X,1/2+Y,1/2-Z'
3   '-X,-Y,-Z'
4   '1/2+X,1/2-Y,1/2+Z'
#------------------------------------------------------------------------------
_cell_length_a                          12.504(2)
_cell_length_b                          19.815(4)
_cell_length_c                          16.172(3)
_cell_angle_alpha                       90.0000
_cell_angle_beta                        97.681(2)
_cell_angle_gamma                       90.0000
_cell_volume                            3970.8(12)
_cell_formula_units_Z                   4
_cell_measurement_reflns_used           8978
_cell_measurement_theta_min             3.02
_cell_measurement_theta_max             27.49
_cell_measurement_temperature           93
#------------------------------------------------------------------------------
_exptl_crystal_description              prism
_exptl_crystal_colour                   colorless
_exptl_crystal_size_max                 0.110
_exptl_crystal_size_mid                 0.100
_exptl_crystal_size_min                 0.070
_exptl_crystal_density_diffrn           1.445
_exptl_crystal_density_meas             ?
_exptl_crystal_density_method          'not measured'
_exptl_crystal_F_000                    1752.00
_exptl_absorpt_coefficient_mu           3.758
_exptl_absorpt_correction_type          multi-scan
_exptl_absorpt_process_details         'REQAB (Rigaku, 1998)'
_exptl_absorpt_correction_T_min         0.632
_exptl_absorpt_correction_T_max         0.769

#==============================================================================
# EXPERIMENTAL DATA

_diffrn_ambient_temperature             93
_diffrn_radiation_type                 'Mo K\a'
_diffrn_radiation_wavelength            0.71075
_diffrn_measurement_device_type        'Rigaku Saturn724'
_diffrn_measurement_method              \w
_diffrn_detector_area_resol_mean        7.111
_diffrn_reflns_number                   32622
_diffrn_reflns_av_R_equivalents         0.0640
_diffrn_reflns_theta_max                27.47
_diffrn_reflns_theta_full               27.47
_diffrn_measured_fraction_theta_max     0.988
_diffrn_measured_fraction_theta_full    0.988
_diffrn_reflns_limit_h_min             -15
_diffrn_reflns_limit_h_max              16
_diffrn_reflns_limit_k_min             -25
_diffrn_reflns_limit_k_max              24
_diffrn_reflns_limit_l_min             -20
_diffrn_reflns_limit_l_max              20
_diffrn_standards_number                0
_diffrn_standards_interval_count        .
_diffrn_standards_decay_%               ?

#==============================================================================
# REFINEMENT DATA

_refine_special_details
;
    Refinement was performed using all reflections. The weighted 
    R-factor (wR) and goodness of fit (S) are based on F^2^.
    R-factor (gt) are based on F. The threshold expression of
    F^2^ > 2.0 sigma(F^2^) is used only for calculating R-factor (gt).
;
_reflns_number_total                    8978
_reflns_number_gt                       7443
_reflns_threshold_expression            F^2^>2.0\s(F^2^)
_refine_ls_structure_factor_coef        Fsqd
_refine_ls_R_factor_gt                  0.0581
_refine_ls_wR_factor_ref                0.1345
_refine_ls_number_restraints            ?
_refine_ls_hydrogen_treatment           constr
_refine_ls_number_reflns                8978
_refine_ls_number_parameters            512
_refine_ls_goodness_of_fit_ref          1.000
_refine_ls_weighting_scheme             calc
_refine_ls_weighting_details
                               'w = 1/[0.0010Fo^2^ + 1.6150\s(Fo^2^)]/(4Fo^2^)'
_atom_sites_solution_hydrogens          geom
_atom_sites_solution_primary            direct
_atom_sites_solution_secondary          difmap
_refine_ls_shift/su_max                 0.000
_refine_diff_density_max                2.570
_refine_diff_density_min               -1.570
_refine_ls_extinction_method            none
_refine_ls_extinction_coef              ?

loop_
_atom_type_symbol
_atom_type_description
_atom_type_scat_dispersion_real
_atom_type_scat_dispersion_imag
_atom_type_scat_source
  'C' 'C'  0.0033 0.0016 
;
International Tables for Crystallography
(1992, Vol. C, Tables 4.2.6.8 and 6.1.1.4)
;
  'H' 'H'  0.0000 0.0000 
;
International Tables for Crystallography
(1992, Vol. C, Table 6.1.1.4)
;
  'Au' 'Au'  -2.0133 8.8022 
;
International Tables for Crystallography
(1992, Vol. C, Tables 4.2.6.8 and 6.1.1.4)
;
  'N' 'N'  0.0061 0.0033 
;
International Tables for Crystallography
(1992, Vol. C, Tables 4.2.6.8 and 6.1.1.4)
;
  'O' 'O'  0.0106 0.0060 
;
International Tables for Crystallography
(1992, Vol. C, Tables 4.2.6.8 and 6.1.1.4)
;

#==============================================================================
# ATOMIC COORDINATES AND THERMAL PARAMETERS

loop_
_atom_site_label
_atom_site_type_symbol
_atom_site_fract_x
_atom_site_fract_y
_atom_site_fract_z
_atom_site_U_iso_or_equiv
_atom_site_adp_type
_atom_site_occupancy
_atom_site_symmetry_multiplicity
_atom_site_calc_flag
_atom_site_refinement_flags
_atom_site_disorder_assembly
_atom_site_disorder_group
 Au1 Au 0.30108(2) 0.919040(10) 0.320980(10) 0.01929(8) Uani 1.0 4 d . . .
 O1 O 0.3020(5) 0.6424(3) 0.5362(3) 0.0374(14) Uani 1.0 4 d . . .
 O2 O 0.3198(4) 0.7321(2) 0.4579(3) 0.0270(12) Uani 1.0 4 d . . .
 N1 N 0.2937(5) 0.7458(3) 0.5964(4) 0.0299(15) Uani 1.0 4 d . . .
 N2 N 0.2865(4) 1.0192(3) 0.1799(3) 0.0180(13) Uani 1.0 4 d . . .
 N3 N 0.2005(4) 1.0584(3) 0.2749(3) 0.0194(13) Uani 1.0 4 d . . .
 C1 C 0.3044(6) 0.7037(3) 0.5317(4) 0.0260(17) Uani 1.0 4 d . . .
 C2 C 0.2822(6) 0.7160(4) 0.6774(4) 0.0305(19) Uani 1.0 4 d . . .
 C3 C 0.3737(6) 0.7329(3) 0.7450(4) 0.0265(17) Uani 1.0 4 d . . .
 C4 C 0.4787(6) 0.7408(4) 0.7274(5) 0.036(2) Uani 1.0 4 d . . .
 C5 C 0.5605(7) 0.7544(4) 0.7905(5) 0.040(3) Uani 1.0 4 d . . .
 C6 C 0.5410(7) 0.7604(4) 0.8726(6) 0.047(3) Uani 1.0 4 d . . .
 C7 C 0.4366(7) 0.7510(4) 0.8910(5) 0.043(3) Uani 1.0 4 d . . .
 C8 C 0.3537(7) 0.7387(4) 0.8270(4) 0.0330(19) Uani 1.0 4 d . . .
 C9 C 0.2945(6) 0.8193(3) 0.5894(4) 0.0274(17) Uani 1.0 4 d . . .
 C10 C 0.2482(6) 0.8392(4) 0.5007(4) 0.0281(17) Uani 1.0 4 d . . .
 C11 C 0.3072(5) 0.8028(3) 0.4401(4) 0.0235(16) Uani 1.0 4 d . . .
 C12 C 0.3421(5) 0.8261(3) 0.3722(4) 0.0215(16) Uani 1.0 4 d . . .
 C13 C 0.4043(5) 0.7829(3) 0.3196(4) 0.0223(16) Uani 1.0 4 d . . .
 C14 C 0.4917(5) 0.7431(3) 0.3545(5) 0.0259(17) Uani 1.0 4 d . . .
 C15 C 0.5504(6) 0.7059(4) 0.3031(5) 0.034(2) Uani 1.0 4 d . . .
 C16 C 0.5239(6) 0.7066(4) 0.2177(5) 0.035(2) Uani 1.0 4 d . . .
 C17 C 0.4379(6) 0.7464(4) 0.1813(5) 0.034(2) Uani 1.0 4 d . . .
 C18 C 0.3803(6) 0.7842(3) 0.2326(5) 0.0284(18) Uani 1.0 4 d . . .
 C19 C 0.2595(5) 1.0049(3) 0.2559(4) 0.0173(14) Uani 1.0 4 d . . .
 C20 C 0.2447(6) 1.0813(3) 0.1517(4) 0.0225(16) Uani 1.0 4 d . . .
 C21 C 0.1914(5) 1.1070(3) 0.2122(4) 0.0213(16) Uani 1.0 4 d . . .
 C22 C 0.3479(6) 0.9752(3) 0.1326(4) 0.0247(17) Uani 1.0 4 d . . .
 C23 C 0.2912(6) 0.9389(4) 0.0661(5) 0.0300(18) Uani 1.0 4 d . . .
 C24 C 0.3525(6) 0.8985(4) 0.0200(5) 0.035(2) Uani 1.0 4 d . . .
 C25 C 0.4633(7) 0.8952(4) 0.0376(5) 0.040(3) Uani 1.0 4 d . . .
 C26 C 0.5169(6) 0.9331(4) 0.1045(5) 0.036(2) Uani 1.0 4 d . . .
 C27 C 0.4585(6) 0.9726(4) 0.1537(4) 0.0284(18) Uani 1.0 4 d . . .
 C28 C 0.1697(6) 0.9407(4) 0.0464(5) 0.0293(18) Uani 1.0 4 d . . .
 C29 C 0.1320(7) 0.9653(4) -0.0424(5) 0.043(3) Uani 1.0 4 d . . .
 C30 C 0.1192(7) 0.8715(4) 0.0607(5) 0.040(3) Uani 1.0 4 d . . .
 C31 C 0.5186(6) 1.0122(4) 0.2265(5) 0.034(2) Uani 1.0 4 d . . .
 C32 C 0.5856(7) 1.0691(4) 0.1964(5) 0.041(3) Uani 1.0 4 d . . .
 C33 C 0.5886(7) 0.9652(5) 0.2877(5) 0.052(3) Uani 1.0 4 d . . .
 C34 C 0.1529(5) 1.0660(3) 0.3514(4) 0.0204(15) Uani 1.0 4 d . . .
 C35 C 0.0440(6) 1.0470(3) 0.3511(4) 0.0251(17) Uani 1.0 4 d . . .
 C36 C 0.0004(6) 1.0605(4) 0.4244(5) 0.0314(19) Uani 1.0 4 d . . .
 C37 C 0.0609(7) 1.0894(4) 0.4925(5) 0.035(2) Uani 1.0 4 d . . .
 C38 C 0.1669(6) 1.1061(3) 0.4906(4) 0.0288(18) Uani 1.0 4 d . . .
 C39 C 0.2168(6) 1.0952(3) 0.4187(5) 0.0287(18) Uani 1.0 4 d . . .
 C40 C -0.0207(5) 1.0145(4) 0.2747(4) 0.0283(18) Uani 1.0 4 d . . .
 C41 C -0.1400(6) 1.0273(4) 0.2702(5) 0.039(3) Uani 1.0 4 d . . .
 C42 C -0.0001(6) 0.9392(4) 0.2692(5) 0.034(2) Uani 1.0 4 d . . .
 C43 C 0.3335(5) 1.1157(4) 0.4164(4) 0.0265(17) Uani 1.0 4 d . . .
 C44 C 0.3523(7) 1.1894(4) 0.4403(5) 0.043(3) Uani 1.0 4 d . . .
 C45 C 0.4103(7) 1.0701(4) 0.4719(6) 0.049(3) Uani 1.0 4 d . . .
 H1 H 0.2143 0.7324 0.6923 0.0370 Uiso 1.0 4 calc R . .
 H2 H 0.2778 0.6675 0.6691 0.0371 Uiso 1.0 4 calc R . .
 H3 H 0.4938 0.7353 0.6730 0.0432 Uiso 1.0 4 calc R . .
 H4 H 0.6301 0.7606 0.7776 0.0478 Uiso 1.0 4 calc R . .
 H5 H 0.5972 0.7699 0.9146 0.0533 Uiso 1.0 4 calc R . .
 H6 H 0.4223 0.7538 0.9459 0.0504 Uiso 1.0 4 calc R . .
 H7 H 0.2837 0.7332 0.8394 0.0396 Uiso 1.0 4 calc R . .
 H8 H 0.2519 0.8373 0.6302 0.0333 Uiso 1.0 4 calc R . .
 H9 H 0.3687 0.8341 0.6030 0.0334 Uiso 1.0 4 calc R . .
 H10 H 0.1723 0.8275 0.4891 0.0336 Uiso 1.0 4 calc R . .
 H11 H 0.2570 0.8872 0.4919 0.0336 Uiso 1.0 4 calc R . .
 H12 H 0.5105 0.7419 0.4122 0.0306 Uiso 1.0 4 calc R . .
 H13 H 0.6087 0.6800 0.3267 0.0408 Uiso 1.0 4 calc R . .
 H14 H 0.5631 0.6810 0.1839 0.0439 Uiso 1.0 4 calc R . .
 H15 H 0.4185 0.7474 0.1238 0.0417 Uiso 1.0 4 calc R . .
 H16 H 0.3238 0.8114 0.2088 0.0340 Uiso 1.0 4 calc R . .
 H17 H 0.2531 1.1016 0.1012 0.0271 Uiso 1.0 4 calc R . .
 H18 H 0.1548 1.1479 0.2110 0.0261 Uiso 1.0 4 calc R . .
 H19 H 0.3177 0.8729 -0.0237 0.0420 Uiso 1.0 4 calc R . .
 H20 H 0.5022 0.8686 0.0048 0.0496 Uiso 1.0 4 calc R . .
 H21 H 0.5916 0.9307 0.1163 0.0432 Uiso 1.0 4 calc R . .
 H22 H 0.1429 0.9725 0.0853 0.0346 Uiso 1.0 4 calc R . .
 H23 H 0.1585 0.9354 -0.0816 0.0499 Uiso 1.0 4 calc R . .
 H24 H 0.0546 0.9661 -0.0520 0.0499 Uiso 1.0 4 calc R . .
 H25 H 0.1593 1.0100 -0.0494 0.0499 Uiso 1.0 4 calc R . .
 H26 H 0.0419 0.8748 0.0514 0.0468 Uiso 1.0 4 calc R . .
 H27 H 0.1427 0.8397 0.0221 0.0469 Uiso 1.0 4 calc R . .
 H28 H 0.1419 0.8565 0.1167 0.0468 Uiso 1.0 4 calc R . .
 H29 H 0.4644 1.0327 0.2571 0.0415 Uiso 1.0 4 calc R . .
 H30 H 0.5388 1.0992 0.1621 0.0479 Uiso 1.0 4 calc R . .
 H31 H 0.6226 1.0935 0.2430 0.0479 Uiso 1.0 4 calc R . .
 H32 H 0.6374 1.0502 0.1642 0.0479 Uiso 1.0 4 calc R . .
 H33 H 0.6411 0.9436 0.2585 0.0606 Uiso 1.0 4 calc R . .
 H34 H 0.6247 0.9910 0.3334 0.0606 Uiso 1.0 4 calc R . .
 H35 H 0.5439 0.9316 0.3087 0.0607 Uiso 1.0 4 calc R . .
 H36 H -0.0712 1.0491 0.4271 0.0386 Uiso 1.0 4 calc R . .
 H37 H 0.0291 1.0980 0.5403 0.0430 Uiso 1.0 4 calc R . .
 H38 H 0.2067 1.1244 0.5380 0.0345 Uiso 1.0 4 calc R . .
 H39 H 0.0028 1.0356 0.2254 0.0343 Uiso 1.0 4 calc R . .
 H40 H -0.1539 1.0749 0.2670 0.0469 Uiso 1.0 4 calc R . .
 H41 H -0.1772 1.0055 0.2216 0.0469 Uiso 1.0 4 calc R . .
 H42 H -0.1651 1.0092 0.3192 0.0470 Uiso 1.0 4 calc R . .
 H43 H 0.0750 0.9320 0.2651 0.0402 Uiso 1.0 4 calc R . .
 H44 H -0.0184 0.9172 0.3182 0.0400 Uiso 1.0 4 calc R . .
 H45 H -0.0430 0.9209 0.2207 0.0402 Uiso 1.0 4 calc R . .
 H46 H 0.3486 1.1100 0.3589 0.0314 Uiso 1.0 4 calc R . .
 H47 H 0.4271 1.2001 0.4399 0.0530 Uiso 1.0 4 calc R . .
 H48 H 0.3088 1.2177 0.4011 0.0530 Uiso 1.0 4 calc R . .
 H49 H 0.3333 1.1969 0.4952 0.0530 Uiso 1.0 4 calc R . .
 H50 H 0.3955 1.0238 0.4572 0.0566 Uiso 1.0 4 calc R . .
 H51 H 0.4835 1.0806 0.4648 0.0566 Uiso 1.0 4 calc R . .
 H52 H 0.4003 1.0772 0.5291 0.0567 Uiso 1.0 4 calc R . .


loop_
_atom_site_aniso_label
_atom_site_aniso_U_11
_atom_site_aniso_U_22
_atom_site_aniso_U_33
_atom_site_aniso_U_12
_atom_site_aniso_U_13
_atom_site_aniso_U_23
 Au1 0.02434(16) 0.01491(13) 0.01835(14) 0.00097(9) 0.00189(10) 0.00132(8)
 O1 0.065(4) 0.020(3) 0.029(3) 0.001(3) 0.012(3) 0.002(2)
 O2 0.039(3) 0.018(3) 0.025(3) 0.0020(19) 0.009(2) 0.0016(18)
 N1 0.046(4) 0.027(3) 0.018(3) -0.002(3) 0.012(3) 0.002(3)
 N2 0.020(3) 0.019(3) 0.013(3) -0.002(2) -0.001(2) 0.0039(18)
 N3 0.023(3) 0.014(3) 0.021(3) 0.004(2) 0.005(3) 0.005(2)
 C1 0.037(4) 0.022(3) 0.018(4) -0.001(3) 0.002(3) 0.002(3)
 C2 0.036(4) 0.032(4) 0.025(4) -0.007(3) 0.009(3) 0.003(3)
 C3 0.034(4) 0.022(3) 0.023(4) 0.004(3) 0.002(3) -0.001(3)
 C4 0.042(5) 0.031(4) 0.035(4) 0.006(4) 0.008(4) 0.006(3)
 C5 0.032(4) 0.041(5) 0.047(5) 0.011(4) 0.000(4) 0.001(4)
 C6 0.055(6) 0.029(4) 0.050(6) 0.003(4) -0.018(5) 0.001(4)
 C7 0.061(6) 0.034(4) 0.030(4) 0.005(4) -0.003(4) 0.006(4)
 C8 0.045(5) 0.030(4) 0.024(4) 0.002(4) 0.006(4) 0.004(3)
 C9 0.029(4) 0.023(4) 0.031(4) -0.003(3) 0.008(3) -0.002(3)
 C10 0.036(4) 0.023(3) 0.025(4) 0.005(3) 0.004(3) -0.002(3)
 C11 0.034(4) 0.015(3) 0.021(4) 0.006(3) 0.001(3) 0.001(3)
 C12 0.028(4) 0.017(3) 0.018(3) 0.001(3) -0.002(3) 0.004(3)
 C13 0.028(4) 0.016(3) 0.022(4) -0.002(3) 0.001(3) 0.006(3)
 C14 0.026(4) 0.021(3) 0.030(4) -0.001(3) -0.000(3) -0.005(3)
 C15 0.026(4) 0.024(4) 0.052(5) 0.006(3) 0.008(4) 0.001(3)
 C16 0.040(4) 0.023(4) 0.046(5) -0.003(3) 0.023(4) -0.007(3)
 C17 0.049(5) 0.026(4) 0.029(4) -0.007(3) 0.015(4) -0.004(3)
 C18 0.034(4) 0.021(3) 0.030(4) 0.004(3) 0.003(3) 0.003(3)
 C19 0.015(3) 0.018(3) 0.019(3) 0.002(3) -0.001(3) 0.001(3)
 C20 0.027(4) 0.021(3) 0.020(4) 0.008(3) 0.004(3) 0.003(3)
 C21 0.034(4) 0.019(3) 0.012(3) 0.002(3) 0.007(3) -0.005(3)
 C22 0.036(4) 0.020(3) 0.020(4) 0.004(3) 0.011(3) -0.003(3)
 C23 0.038(4) 0.027(4) 0.025(4) 0.002(3) 0.003(3) 0.001(3)
 C24 0.041(5) 0.036(4) 0.028(4) 0.000(4) 0.006(4) -0.008(3)
 C25 0.055(5) 0.028(4) 0.041(5) 0.012(4) 0.017(4) -0.008(4)
 C26 0.029(4) 0.046(5) 0.033(4) 0.009(4) 0.011(4) -0.003(4)
 C27 0.030(4) 0.031(4) 0.025(4) 0.001(3) 0.005(3) -0.003(3)
 C28 0.030(4) 0.020(3) 0.035(4) -0.004(3) -0.002(3) -0.005(3)
 C29 0.059(6) 0.034(4) 0.032(5) 0.005(4) -0.006(4) -0.001(4)
 C30 0.049(5) 0.024(4) 0.044(5) -0.005(4) -0.006(4) 0.010(4)
 C31 0.021(4) 0.050(5) 0.033(4) -0.002(3) 0.006(3) -0.004(4)
 C32 0.035(5) 0.043(5) 0.042(5) 0.004(4) -0.007(4) -0.007(4)
 C33 0.043(5) 0.079(7) 0.029(5) -0.022(5) -0.007(4) 0.021(5)
 C34 0.029(4) 0.013(3) 0.021(3) 0.002(3) 0.007(3) 0.000(3)
 C35 0.033(4) 0.019(3) 0.025(4) -0.004(3) 0.010(3) 0.005(3)
 C36 0.037(4) 0.028(4) 0.031(4) -0.002(3) 0.013(4) 0.007(3)
 C37 0.053(5) 0.033(4) 0.021(4) -0.004(4) 0.016(4) -0.001(3)
 C38 0.052(5) 0.021(3) 0.013(3) -0.002(3) 0.004(3) -0.001(3)
 C39 0.044(5) 0.016(3) 0.026(4) 0.002(3) 0.003(4) 0.005(3)
 C40 0.030(4) 0.032(4) 0.024(4) -0.009(3) 0.007(3) 0.001(3)
 C41 0.032(4) 0.036(4) 0.049(5) -0.006(4) 0.004(4) 0.004(4)
 C42 0.034(4) 0.032(4) 0.034(4) -0.009(3) -0.003(4) -0.008(3)
 C43 0.028(4) 0.027(4) 0.023(4) -0.005(3) 0.001(3) -0.002(3)
 C44 0.048(5) 0.030(4) 0.055(6) -0.009(4) 0.015(4) -0.008(4)
 C45 0.041(5) 0.032(4) 0.069(7) -0.006(4) -0.015(5) 0.024(4)

#==============================================================================
_computing_data_collection             'CrystalClear (Rigaku Inc., 2008)'
_computing_cell_refinement              CrystalClear
_computing_data_reduction               CrystalClear
_computing_structure_solution           SIR97
_computing_structure_refinement        'CRYSTALS (Carruthers, et al., 1999)'
_computing_publication_material        'CrystalStructure 4.0 (Rigaku, 2010)'
_computing_molecular_graphics          'CrystalStructure 4.0'

#==============================================================================
# MOLECULAR GEOMETRY

_geom_special_details
;
    ENTER SPECIAL DETAILS OF THE MOLECULAR GEOMETRY
;

loop_
_geom_bond_atom_site_label_1
_geom_bond_atom_site_label_2
_geom_bond_distance
_geom_bond_publ_flag
_geom_bond_site_symmetry_1
_geom_bond_site_symmetry_2
Au1 C12 2.056(6) yes . .
Au1 C19 2.032(6) yes . .
O1 C1 1.216(8) yes . .
O2 C1 1.358(8) yes . .
O2 C11 1.434(7) yes . .
N1 C1 1.358(9) yes . .
N1 C2 1.462(9) yes . .
N1 C9 1.461(9) yes . .
N2 C19 1.347(8) yes . .
N2 C20 1.388(8) yes . .
N2 C22 1.448(8) yes . .
N3 C19 1.350(8) yes . .
N3 C21 1.392(8) yes . .
N3 C34 1.451(9) yes . .
C2 C3 1.510(9) yes . .
C3 C4 1.390(11) yes . .
C3 C8 1.386(10) yes . .
C4 C5 1.372(10) yes . .
C5 C6 1.385(13) yes . .
C6 C7 1.389(13) yes . .
C7 C8 1.386(11) yes . .
C9 C10 1.525(9) yes . .
C10 C11 1.490(10) yes . .
C11 C12 1.318(9) yes . .
C12 C13 1.496(9) yes . .
C13 C14 1.404(9) yes . .
C13 C18 1.399(9) yes . .
C14 C15 1.392(10) yes . .
C15 C16 1.377(11) yes . .
C16 C17 1.398(10) yes . .
C17 C18 1.388(11) yes . .
C20 C21 1.354(10) yes . .
C22 C23 1.403(9) yes . .
C22 C27 1.381(9) yes . .
C23 C24 1.391(11) yes . .
C23 C28 1.511(10) yes . .
C24 C25 1.379(11) yes . .
C25 C26 1.410(10) yes . .
C26 C27 1.390(11) yes . .
C27 C31 1.526(10) yes . .
C28 C29 1.530(10) yes . .
C28 C30 1.541(10) yes . .
C31 C32 1.523(11) yes . .
C31 C33 1.543(11) yes . .
C34 C35 1.412(9) yes . .
C34 C39 1.388(9) yes . .
C35 C36 1.395(10) yes . .
C35 C40 1.526(9) yes . .
C36 C37 1.375(10) yes . .
C37 C38 1.371(11) yes . .
C38 C39 1.408(11) yes . .
C39 C43 1.520(10) yes . .
C40 C41 1.505(10) yes . .
C40 C42 1.518(10) yes . .
C43 C44 1.520(10) yes . .
C43 C45 1.522(10) yes . .
C2 H1 0.970 no . .
C2 H2 0.970 no . .
C4 H3 0.930 no . .
C5 H4 0.930 no . .
C6 H5 0.930 no . .
C7 H6 0.930 no . .
C8 H7 0.930 no . .
C9 H8 0.970 no . .
C9 H9 0.970 no . .
C10 H10 0.970 no . .
C10 H11 0.970 no . .
C14 H12 0.930 no . .
C15 H13 0.930 no . .
C16 H14 0.930 no . .
C17 H15 0.930 no . .
C18 H16 0.930 no . .
C20 H17 0.930 no . .
C21 H18 0.930 no . .
C24 H19 0.930 no . .
C25 H20 0.930 no . .
C26 H21 0.930 no . .
C28 H22 0.980 no . .
C29 H23 0.960 no . .
C29 H24 0.960 no . .
C29 H25 0.960 no . .
C30 H26 0.960 no . .
C30 H27 0.960 no . .
C30 H28 0.960 no . .
C31 H29 0.980 no . .
C32 H30 0.960 no . .
C32 H31 0.960 no . .
C32 H32 0.960 no . .
C33 H33 0.960 no . .
C33 H34 0.960 no . .
C33 H35 0.960 no . .
C36 H36 0.930 no . .
C37 H37 0.930 no . .
C38 H38 0.930 no . .
C40 H39 0.980 no . .
C41 H40 0.960 no . .
C41 H41 0.960 no . .
C41 H42 0.960 no . .
C42 H43 0.960 no . .
C42 H44 0.960 no . .
C42 H45 0.960 no . .
C43 H46 0.980 no . .
C44 H47 0.960 no . .
C44 H48 0.960 no . .
C44 H49 0.960 no . .
C45 H50 0.960 no . .
C45 H51 0.960 no . .
C45 H52 0.960 no . .

loop_
_geom_angle_atom_site_label_1
_geom_angle_atom_site_label_2
_geom_angle_atom_site_label_3
_geom_angle
_geom_angle_publ_flag
_geom_angle_site_symmetry_1
_geom_angle_site_symmetry_2
_geom_angle_site_symmetry_3
C12 Au1 C19 172.6(3) yes . . .
C1 O2 C11 123.9(5) yes . . .
C1 N1 C2 118.2(6) yes . . .
C1 N1 C9 123.4(6) yes . . .
C2 N1 C9 118.3(6) yes . . .
C19 N2 C20 110.9(5) yes . . .
C19 N2 C22 124.8(5) yes . . .
C20 N2 C22 124.3(5) yes . . .
C19 N3 C21 111.7(5) yes . . .
C19 N3 C34 125.1(5) yes . . .
C21 N3 C34 123.1(5) yes . . .
O1 C1 O2 118.3(6) yes . . .
O1 C1 N1 124.2(6) yes . . .
O2 C1 N1 117.5(6) yes . . .
N1 C2 C3 113.8(6) yes . . .
C2 C3 C4 121.4(6) yes . . .
C2 C3 C8 119.7(7) yes . . .
C4 C3 C8 118.9(6) yes . . .
C3 C4 C5 120.0(7) yes . . .
C4 C5 C6 121.3(8) yes . . .
C5 C6 C7 119.0(8) yes . . .
C6 C7 C8 119.5(8) yes . . .
C3 C8 C7 121.1(8) yes . . .
N1 C9 C10 108.9(5) yes . . .
C9 C10 C11 109.5(6) yes . . .
O2 C11 C10 113.1(6) yes . . .
O2 C11 C12 118.0(6) yes . . .
C10 C11 C12 128.8(6) yes . . .
Au1 C12 C11 123.9(5) yes . . .
Au1 C12 C13 113.9(4) yes . . .
C11 C12 C13 121.8(6) yes . . .
C12 C13 C14 122.0(6) yes . . .
C12 C13 C18 120.2(6) yes . . .
C14 C13 C18 117.7(6) yes . . .
C13 C14 C15 120.1(6) yes . . .
C14 C15 C16 121.2(6) yes . . .
C15 C16 C17 119.7(7) yes . . .
C16 C17 C18 118.9(7) yes . . .
C13 C18 C17 122.2(6) yes . . .
Au1 C19 N2 124.8(5) yes . . .
Au1 C19 N3 130.4(5) yes . . .
N2 C19 N3 104.7(5) yes . . .
N2 C20 C21 107.2(6) yes . . .
N3 C21 C20 105.4(6) yes . . .
N2 C22 C23 117.7(6) yes . . .
N2 C22 C27 118.4(6) yes . . .
C23 C22 C27 123.9(7) yes . . .
C22 C23 C24 116.5(7) yes . . .
C22 C23 C28 122.7(7) yes . . .
C24 C23 C28 120.7(6) yes . . .
C23 C24 C25 121.8(7) yes . . .
C24 C25 C26 119.6(7) yes . . .
C25 C26 C27 120.5(7) yes . . .
C22 C27 C26 117.7(6) yes . . .
C22 C27 C31 123.1(6) yes . . .
C26 C27 C31 119.3(6) yes . . .
C23 C28 C29 112.3(6) yes . . .
C23 C28 C30 111.6(6) yes . . .
C29 C28 C30 110.1(6) yes . . .
C27 C31 C32 111.7(6) yes . . .
C27 C31 C33 111.3(7) yes . . .
C32 C31 C33 111.2(6) yes . . .
N3 C34 C35 118.3(5) yes . . .
N3 C34 C39 116.9(6) yes . . .
C35 C34 C39 124.6(7) yes . . .
C34 C35 C36 115.6(6) yes . . .
C34 C35 C40 121.5(6) yes . . .
C36 C35 C40 122.9(6) yes . . .
C35 C36 C37 121.7(7) yes . . .
C36 C37 C38 120.8(7) yes . . .
C37 C38 C39 121.2(6) yes . . .
C34 C39 C38 116.0(7) yes . . .
C34 C39 C43 123.1(7) yes . . .
C38 C39 C43 120.8(6) yes . . .
C35 C40 C41 112.5(6) yes . . .
C35 C40 C42 112.8(6) yes . . .
C41 C40 C42 109.7(6) yes . . .
C39 C43 C44 111.5(6) yes . . .
C39 C43 C45 111.0(6) yes . . .
C44 C43 C45 110.9(6) yes . . .
N1 C2 H1 106.321 no . . .
N1 C2 H2 106.610 no . . .
C3 C2 H1 110.488 no . . .
C3 C2 H2 110.080 no . . .
H1 C2 H2 109.323 no . . .
C3 C4 H3 119.843 no . . .
C5 C4 H3 120.120 no . . .
C4 C5 H4 119.018 no . . .
C6 C5 H4 119.642 no . . .
C5 C6 H5 120.229 no . . .
C7 C6 H5 120.723 no . . .
C6 C7 H6 120.198 no . . .
C8 C7 H6 120.245 no . . .
C3 C8 H7 119.456 no . . .
C7 C8 H7 119.419 no . . .
N1 C9 H8 107.669 no . . .
N1 C9 H9 107.450 no . . .
C10 C9 H8 111.769 no . . .
C10 C9 H9 111.533 no . . .
H8 C9 H9 109.306 no . . .
C9 C10 H10 111.069 no . . .
C9 C10 H11 110.801 no . . .
C11 C10 H10 108.360 no . . .
C11 C10 H11 107.579 no . . .
H10 C10 H11 109.399 no . . .
C13 C14 H12 119.756 no . . .
C15 C14 H12 120.125 no . . .
C14 C15 H13 119.574 no . . .
C16 C15 H13 119.178 no . . .
C15 C16 H14 120.553 no . . .
C17 C16 H14 119.706 no . . .
C16 C17 H15 121.046 no . . .
C18 C17 H15 120.006 no . . .
C13 C18 H16 118.382 no . . .
C17 C18 H16 119.448 no . . .
N2 C20 H17 126.218 no . . .
C21 C20 H17 126.577 no . . .
N3 C21 H18 127.540 no . . .
C20 C21 H18 127.007 no . . .
C23 C24 H19 119.129 no . . .
C25 C24 H19 119.068 no . . .
C24 C25 H20 119.758 no . . .
C26 C25 H20 120.615 no . . .
C25 C26 H21 119.398 no . . .
C27 C26 H21 120.129 no . . .
C23 C28 H22 107.485 no . . .
C29 C28 H22 107.995 no . . .
C30 C28 H22 107.130 no . . .
C28 C29 H23 109.478 no . . .
C28 C29 H24 109.533 no . . .
C28 C29 H25 109.493 no . . .
H23 C29 H24 109.443 no . . .
H23 C29 H25 109.441 no . . .
H24 C29 H25 109.440 no . . .
C28 C30 H26 109.899 no . . .
C28 C30 H27 108.627 no . . .
C28 C30 H28 109.987 no . . .
H26 C30 H27 109.434 no . . .
H26 C30 H28 109.439 no . . .
H27 C30 H28 109.438 no . . .
C27 C31 H29 107.532 no . . .
C32 C31 H29 107.517 no . . .
C33 C31 H29 107.283 no . . .
C31 C32 H30 109.067 no . . .
C31 C32 H31 110.540 no . . .
C31 C32 H32 108.895 no . . .
H30 C32 H31 109.440 no . . .
H30 C32 H32 109.445 no . . .
H31 C32 H32 109.437 no . . .
C31 C33 H33 108.692 no . . .
C31 C33 H34 109.970 no . . .
C31 C33 H35 109.828 no . . .
H33 C33 H34 109.447 no . . .
H33 C33 H35 109.439 no . . .
H34 C33 H35 109.448 no . . .
C35 C36 H36 118.847 no . . .
C37 C36 H36 119.487 no . . .
C36 C37 H37 119.463 no . . .
C38 C37 H37 119.702 no . . .
C37 C38 H38 119.302 no . . .
C39 C38 H38 119.482 no . . .
C35 C40 H39 107.130 no . . .
C41 C40 H39 106.915 no . . .
C42 C40 H39 107.472 no . . .
C40 C41 H40 109.828 no . . .
C40 C41 H41 109.472 no . . .
C40 C41 H42 109.199 no . . .
H40 C41 H41 109.438 no . . .
H40 C41 H42 109.455 no . . .
H41 C41 H42 109.435 no . . .
C40 C42 H43 109.005 no . . .
C40 C42 H44 109.724 no . . .
C40 C42 H45 109.775 no . . .
H43 C42 H44 109.436 no . . .
H43 C42 H45 109.441 no . . .
H44 C42 H45 109.446 no . . .
C39 C43 H46 107.419 no . . .
C44 C43 H46 108.080 no . . .
C45 C43 H46 107.773 no . . .
C43 C44 H47 109.155 no . . .
C43 C44 H48 109.819 no . . .
C43 C44 H49 109.532 no . . .
H47 C44 H48 109.437 no . . .
H47 C44 H49 109.449 no . . .
H48 C44 H49 109.435 no . . .
C43 C45 H50 109.609 no . . .
C43 C45 H51 109.697 no . . .
C43 C45 H52 109.195 no . . .
H50 C45 H51 109.441 no . . .
H50 C45 H52 109.441 no . . .
H51 C45 H52 109.444 no . . .

loop_
_geom_torsion_atom_site_label_1
_geom_torsion_atom_site_label_2
_geom_torsion_atom_site_label_3
_geom_torsion_atom_site_label_4
_geom_torsion
_geom_torsion_publ_flag
_geom_torsion_site_symmetry_1
_geom_torsion_site_symmetry_2
_geom_torsion_site_symmetry_3
_geom_torsion_site_symmetry_4
C1 O2 C11 C10 -15.2(8) no . . . .
C1 O2 C11 C12 168.6(5) no . . . .
C11 O2 C1 O1 169.6(5) no . . . .
C11 O2 C1 N1 -11.1(9) no . . . .
C1 N1 C2 C3 116.5(6) no . . . .
C2 N1 C1 O1 2.1(10) no . . . .
C2 N1 C1 O2 -177.1(5) no . . . .
C1 N1 C9 C10 30.5(8) no . . . .
C9 N1 C1 O1 -178.7(6) no . . . .
C9 N1 C1 O2 2.1(9) no . . . .
C2 N1 C9 C10 -150.3(5) no . . . .
C9 N1 C2 C3 -62.8(8) no . . . .
C19 N2 C20 C21 0.9(6) no . . . .
C20 N2 C19 Au1 179.1(4) no . . . .
C20 N2 C19 N3 0.1(6) no . . . .
C19 N2 C22 C23 103.0(6) no . . . .
C19 N2 C22 C27 -78.8(7) no . . . .
C22 N2 C19 Au1 0.9(8) no . . . .
C22 N2 C19 N3 -178.2(5) no . . . .
C20 N2 C22 C23 -75.0(7) no . . . .
C20 N2 C22 C27 103.2(6) no . . . .
C22 N2 C20 C21 179.1(5) no . . . .
C19 N3 C21 C20 1.6(6) no . . . .
C21 N3 C19 Au1 180.0(4) no . . . .
C21 N3 C19 N2 -1.0(6) no . . . .
C19 N3 C34 C35 -95.9(6) no . . . .
C19 N3 C34 C39 87.7(7) no . . . .
C34 N3 C19 Au1 0.9(8) no . . . .
C34 N3 C19 N2 179.9(5) no . . . .
C21 N3 C34 C35 85.1(7) no . . . .
C21 N3 C34 C39 -91.3(6) no . . . .
C34 N3 C21 C20 -179.3(5) no . . . .
N1 C2 C3 C4 -33.8(8) no . . . .
N1 C2 C3 C8 148.2(6) no . . . .
C2 C3 C4 C5 -178.4(6) no . . . .
C2 C3 C8 C7 176.9(6) no . . . .
C4 C3 C8 C7 -1.2(10) no . . . .
C8 C3 C4 C5 -0.3(10) no . . . .
C3 C4 C5 C6 0.3(11) no . . . .
C4 C5 C6 C7 1.2(11) no . . . .
C5 C6 C7 C8 -2.6(10) no . . . .
C6 C7 C8 C3 2.7(10) no . . . .
N1 C9 C10 C11 -53.4(7) no . . . .
C9 C10 C11 O2 47.1(7) no . . . .
C9 C10 C11 C12 -137.1(6) no . . . .
O2 C11 C12 Au1 165.2(4) no . . . .
O2 C11 C12 C13 -6.9(8) no . . . .
C10 C11 C12 Au1 -10.4(10) no . . . .
C10 C11 C12 C13 177.6(5) no . . . .
Au1 C12 C13 C14 139.5(4) no . . . .
Au1 C12 C13 C18 -36.7(7) no . . . .
C11 C12 C13 C14 -47.7(8) no . . . .
C11 C12 C13 C18 136.1(6) no . . . .
C12 C13 C14 C15 -177.2(5) no . . . .
C12 C13 C18 C17 178.2(5) no . . . .
C14 C13 C18 C17 1.8(9) no . . . .
C18 C13 C14 C15 -0.9(9) no . . . .
C13 C14 C15 C16 -0.7(10) no . . . .
C14 C15 C16 C17 1.5(10) no . . . .
C15 C16 C17 C18 -0.5(10) no . . . .
C16 C17 C18 C13 -1.2(10) no . . . .
N2 C20 C21 N3 -1.4(6) no . . . .
N2 C22 C23 C24 178.1(5) no . . . .
N2 C22 C23 C28 -4.2(9) no . . . .
N2 C22 C27 C26 -176.2(5) no . . . .
N2 C22 C27 C31 2.2(9) no . . . .
C23 C22 C27 C26 1.9(10) no . . . .
C23 C22 C27 C31 -179.7(6) no . . . .
C27 C22 C23 C24 -0.0(10) no . . . .
C27 C22 C23 C28 177.6(6) no . . . .
C22 C23 C24 C25 -1.3(10) no . . . .
C22 C23 C28 C29 121.9(7) no . . . .
C22 C23 C28 C30 -113.9(7) no . . . .
C24 C23 C28 C29 -60.5(8) no . . . .
C24 C23 C28 C30 63.6(8) no . . . .
C28 C23 C24 C25 -179.0(6) no . . . .
C23 C24 C25 C26 0.7(11) no . . . .
C24 C25 C26 C27 1.3(11) no . . . .
C25 C26 C27 C22 -2.5(10) no . . . .
C25 C26 C27 C31 179.0(6) no . . . .
C22 C27 C31 C32 -110.1(7) no . . . .
C22 C27 C31 C33 124.9(7) no . . . .
C26 C27 C31 C32 68.3(8) no . . . .
C26 C27 C31 C33 -56.7(8) no . . . .
N3 C34 C35 C36 -175.1(5) no . . . .
N3 C34 C35 C40 4.4(8) no . . . .
N3 C34 C39 C38 176.1(5) no . . . .
N3 C34 C39 C43 -3.1(8) no . . . .
C35 C34 C39 C38 -0.1(9) no . . . .
C35 C34 C39 C43 -179.3(5) no . . . .
C39 C34 C35 C36 1.0(9) no . . . .
C39 C34 C35 C40 -179.4(5) no . . . .
C34 C35 C36 C37 -1.0(9) no . . . .
C34 C35 C40 C41 -153.4(5) no . . . .
C34 C35 C40 C42 81.8(7) no . . . .
C36 C35 C40 C41 26.1(8) no . . . .
C36 C35 C40 C42 -98.6(7) no . . . .
C40 C35 C36 C37 179.5(5) no . . . .
C35 C36 C37 C38 0.1(10) no . . . .
C36 C37 C38 C39 0.9(10) no . . . .
C37 C38 C39 C34 -0.9(9) no . . . .
C37 C38 C39 C43 178.3(6) no . . . .
C34 C39 C43 C44 125.6(6) no . . . .
C34 C39 C43 C45 -110.3(6) no . . . .
C38 C39 C43 C44 -53.6(8) no . . . .
C38 C39 C43 C45 70.6(7) no . . . .

loop_
_geom_contact_atom_site_label_1
_geom_contact_atom_site_label_2
_geom_contact_distance
_geom_contact_publ_flag
_geom_contact_site_symmetry_1
_geom_contact_site_symmetry_2
Au1 C10 3.450(7) no . .
Au1 C18 3.247(7) no . .
Au1 C22 3.368(7) no . .
Au1 C34 3.521(6) no . .
O1 C2 2.748(9) no . .
O1 C11 3.541(8) no . .
O2 C9 2.791(8) no . .
O2 C13 2.785(8) no . .
O2 C14 2.901(9) no . .
N1 C4 2.922(9) no . .
N1 C11 2.794(9) no . .
N2 C28 2.892(8) no . .
N2 C31 2.903(8) no . .
N2 C34 3.547(9) no . .
N3 C22 3.542(9) no . .
N3 C40 2.899(9) no . .
N3 C42 3.437(9) no . .
N3 C43 2.876(8) no . .
C1 C3 3.491(9) no . .
C1 C10 2.804(9) no . .
C3 C6 2.788(11) no . .
C3 C9 3.096(9) no . .
C4 C7 2.774(12) no . .
C4 C9 3.366(10) no . .
C5 C8 2.746(12) no . .
C11 C14 3.080(10) no . .
C13 C16 2.811(10) no . .
C14 C17 2.793(10) no . .
C15 C18 2.754(9) no . .
C19 C23 3.407(9) no . .
C19 C27 3.230(9) no . .
C19 C31 3.339(9) no . .
C19 C35 3.382(9) no . .
C19 C39 3.286(9) no . .
C19 C40 3.562(9) no . .
C19 C42 3.530(10) no . .
C19 C43 3.431(9) no . .
C20 C23 3.229(9) no . .
C20 C27 3.430(9) no . .
C20 C28 3.332(9) no . .
C20 C34 3.582(10) no . .
C21 C35 3.311(10) no . .
C21 C39 3.321(9) no . .
C21 C40 3.483(10) no . .
C21 C43 3.539(9) no . .
C22 C25 2.746(11) no . .
C22 C30 3.586(10) no . .
C22 C32 3.542(10) no . .
C23 C26 2.809(10) no . .
C24 C27 2.796(10) no . .
C24 C29 3.103(11) no . .
C24 C30 3.121(12) no . .
C26 C32 3.141(11) no . .
C26 C33 3.046(11) no . .
C34 C37 2.729(10) no . .
C34 C42 3.325(9) no . .
C34 C45 3.534(10) no . .
C35 C38 2.810(9) no . .
C36 C39 2.806(11) no . .
C36 C41 2.926(10) no . .
C36 C42 3.473(10) no . .
C38 C44 3.044(11) no . .
C38 C45 3.180(12) no . .
O1 C20 3.251(8) no . 2_545
O2 C6 3.578(10) no . 4_464
O2 C20 3.513(7) no . 2_545
C6 O2 3.578(10) no . 4_565
C6 C11 3.587(11) no . 4_565
C11 C6 3.587(11) no . 4_464
C15 C21 3.585(9) no . 2_545
C16 C35 3.420(9) no . 2_545
C20 O1 3.251(8) no . 2_555
C20 O2 3.513(7) no . 2_555
C21 C15 3.585(9) no . 2_555
C32 C41 3.576(10) no . 1_655
C35 C16 3.420(9) no . 2_555
C36 C36 3.425(10) no . 3_576
C36 C37 3.388(10) no . 3_576
C37 C36 3.388(10) no . 3_576
C41 C32 3.576(10) no . 1_455
Au1 H11 2.9574 no . .
Au1 H16 2.8390 no . .
Au1 H29 3.2969 no . .
Au1 H35 3.0795 no . .
Au1 H43 2.8624 no . .
Au1 H50 3.1402 no . .
O1 H1 3.3901 no . .
O1 H2 2.2648 no . .
O1 H3 3.5518 no . .
O2 H9 3.0953 no . .
O2 H10 2.7348 no . .
O2 H11 3.2363 no . .
O2 H12 2.5963 no . .
N1 H3 2.6470 no . .
N1 H10 2.6899 no . .
N1 H11 3.2722 no . .
N2 H18 3.1117 no . .
N2 H22 2.3840 no . .
N2 H29 2.4164 no . .
N2 H30 3.5765 no . .
N2 H43 3.5855 no . .
N2 H46 3.4076 no . .
N3 H17 3.0914 no . .
N3 H22 3.4961 no . .
N3 H29 3.3883 no . .
N3 H39 2.5357 no . .
N3 H43 2.9482 no . .
N3 H46 2.3757 no . .
C1 H1 3.0195 no . .
C1 H2 2.3986 no . .
C1 H3 3.1268 no . .
C1 H8 3.2025 no . .
C1 H9 2.8995 no . .
C1 H10 2.9868 no . .
C1 H12 3.5058 no . .
C2 H3 2.6832 no . .
C2 H7 2.6387 no . .
C2 H8 2.5348 no . .
C2 H9 2.9053 no . .
C3 H4 3.2263 no . .
C3 H6 3.2506 no . .
C3 H8 3.0484 no . .
C3 H9 3.0438 no . .
C4 H1 3.2837 no . .
C4 H2 2.9450 no . .
C4 H5 3.2395 no . .
C4 H7 3.2296 no . .
C4 H9 2.9354 no . .
C5 H6 3.2341 no . .
C6 H3 3.2405 no . .
C6 H7 3.2351 no . .
C7 H4 3.2314 no . .
C8 H1 2.6043 no . .
C8 H2 2.9598 no . .
C8 H3 3.2311 no . .
C8 H5 3.2423 no . .
C9 H1 2.6805 no . .
C9 H2 3.2890 no . .
C9 H3 3.1467 no . .
C11 H8 3.3120 no . .
C11 H9 2.7162 no . .
C11 H12 2.9033 no . .
C12 H10 3.0250 no . .
C12 H11 2.6251 no . .
C12 H12 2.6970 no . .
C12 H16 2.6372 no . .
C12 H35 3.5333 no . .
C13 H13 3.2589 no . .
C13 H15 3.2730 no . .
C13 H35 3.4413 no . .
C14 H14 3.2524 no . .
C14 H16 3.2357 no . .
C15 H15 3.2453 no . .
C16 H12 3.2479 no . .
C16 H16 3.2401 no . .
C17 H13 3.2372 no . .
C18 H12 3.2434 no . .
C18 H14 3.2403 no . .
C18 H28 3.5997 no . .
C19 H17 3.1439 no . .
C19 H18 3.1639 no . .
C19 H22 3.0116 no . .
C19 H29 2.6174 no . .
C19 H39 3.2399 no . .
C19 H43 2.7436 no . .
C19 H46 2.8020 no . .
C19 H50 3.4863 no . .
C20 H22 2.6547 no . .
C20 H25 3.5748 no . .
C20 H29 3.1828 no . .
C20 H39 3.5142 no . .
C20 H46 3.4746 no . .
C21 H22 3.3673 no . .
C21 H39 2.7825 no . .
C21 H46 2.8718 no . .
C22 H16 3.4999 no . .
C22 H17 2.7894 no . .
C22 H19 3.2221 no . .
C22 H21 3.2171 no . .
C22 H22 2.5753 no . .
C22 H25 3.5830 no . .
C22 H28 3.4720 no . .
C22 H29 2.5877 no . .
C22 H30 3.4152 no . .
C23 H16 3.4109 no . .
C23 H17 3.3188 no . .
C23 H20 3.2530 no . .
C23 H23 2.7214 no . .
C23 H24 3.3441 no . .
C23 H25 2.7140 no . .
C23 H26 3.3455 no . .
C23 H27 2.7324 no . .
C23 H28 2.6898 no . .
C24 H15 3.4776 no . .
C24 H16 3.5675 no . .
C24 H21 3.2448 no . .
C24 H22 3.2973 no . .
C24 H23 2.8377 no . .
C24 H25 3.3540 no . .
C24 H27 2.8739 no . .
C24 H28 3.3425 no . .
C25 H15 3.3237 no . .
C26 H19 3.2474 no . .
C26 H29 3.2940 no . .
C26 H30 3.4217 no . .
C26 H32 2.8623 no . .
C26 H33 2.7620 no . .
C26 H35 3.2752 no . .
C27 H20 3.2703 no . .
C27 H30 2.6993 no . .
C27 H31 3.3527 no . .
C27 H32 2.7005 no . .
C27 H33 2.7174 no . .
C27 H34 3.3590 no . .
C27 H35 2.7152 no . .
C28 H17 3.4332 no . .
C28 H19 2.6613 no . .
C29 H19 2.9415 no . .
C29 H26 2.6921 no . .
C29 H27 2.6952 no . .
C29 H28 3.3473 no . .
C30 H16 3.4734 no . .
C30 H19 2.9885 no . .
C30 H23 2.7284 no . .
C30 H24 2.6636 no . .
C30 H25 3.3445 no . .
C31 H21 2.6555 no . .
C32 H21 3.0383 no . .
C32 H33 2.7365 no . .
C32 H34 2.6930 no . .
C32 H35 3.3537 no . .
C33 H21 2.8608 no . .
C33 H30 3.3514 no . .
C33 H31 2.6923 no . .
C33 H32 2.7425 no . .
C34 H18 2.7934 no . .
C34 H36 3.2217 no . .
C34 H38 3.2182 no . .
C34 H39 2.6494 no . .
C34 H43 3.0953 no . .
C34 H46 2.5849 no . .
C34 H50 3.3824 no . .
C35 H18 3.4467 no . .
C35 H37 3.2509 no . .
C35 H40 2.7166 no . .
C35 H41 3.3413 no . .
C35 H42 2.7024 no . .
C35 H43 2.7240 no . .
C35 H44 2.7207 no . .
C35 H45 3.3554 no . .
C36 H38 3.2208 no . .
C36 H39 3.2599 no . .
C36 H40 2.9953 no . .
C36 H42 2.6953 no . .
C36 H44 3.3098 no . .
C38 H36 3.2213 no . .
C38 H46 3.3171 no . .
C38 H48 3.2905 no . .
C38 H49 2.7439 no . .
C38 H50 3.3967 no . .
C38 H52 2.9577 no . .
C39 H18 3.5033 no . .
C39 H37 3.2574 no . .
C39 H47 3.3329 no . .
C39 H48 2.7174 no . .
C39 H49 2.6877 no . .
C39 H50 2.6478 no . .
C39 H51 3.3307 no . .
C39 H52 2.7357 no . .
C40 H36 2.7131 no . .
C41 H36 2.6050 no . .
C41 H43 3.2939 no . .
C41 H44 2.7122 no . .
C41 H45 2.6091 no . .
C42 H36 3.5581 no . .
C42 H40 3.3028 no . .
C42 H41 2.6012 no . .
C42 H42 2.6987 no . .
C43 H38 2.6918 no . .
C44 H38 2.8698 no . .
C44 H50 3.3309 no . .
C44 H51 2.7059 no . .
C44 H52 2.6716 no . .
C45 H38 3.0831 no . .
C45 H47 2.6413 no . .
C45 H48 3.3307 no . .
C45 H49 2.7336 no . .
H1 H3 3.5507 no . .
H1 H7 2.4204 no . .
H1 H8 2.3817 no . .
H1 H9 3.2586 no . .
H2 H3 3.0094 no . .
H2 H7 3.0377 no . .
H2 H8 3.4289 no . .
H3 H4 2.2908 no . .
H3 H9 2.6609 no . .
H4 H5 2.3135 no . .
H5 H6 2.3323 no . .
H6 H7 2.3113 no . .
H8 H10 2.3729 no . .
H8 H11 2.4545 no . .
H9 H10 2.8696 no . .
H9 H11 2.3701 no . .
H11 H50 3.3018 no . .
H12 H13 2.3175 no . .
H13 H14 2.3037 no . .
H14 H15 2.3390 no . .
H15 H16 2.3109 no . .
H15 H19 3.5576 no . .
H15 H20 3.3324 no . .
H16 H27 3.5682 no . .
H16 H28 2.6989 no . .
H17 H18 2.4682 no . .
H17 H22 2.9005 no . .
H17 H25 3.1364 no . .
H17 H30 3.5766 no . .
H18 H39 2.9553 no . .
H18 H46 3.2560 no . .
H19 H20 2.2924 no . .
H19 H22 3.5799 no . .
H19 H23 2.4238 no . .
H19 H25 3.3552 no . .
H19 H27 2.4901 no . .
H19 H28 3.3810 no . .
H20 H21 2.3405 no . .
H21 H29 3.5742 no . .
H21 H30 3.5029 no . .
H21 H32 2.5326 no . .
H21 H33 2.3151 no . .
H21 H35 3.2462 no . .
H22 H23 2.8303 no . .
H22 H24 2.3479 no . .
H22 H25 2.3353 no . .
H22 H26 2.3373 no . .
H22 H27 2.8235 no . .
H22 H28 2.3555 no . .
H22 H39 3.2900 no . .
H22 H43 3.2376 no . .
H22 H45 3.5507 no . .
H23 H26 3.0062 no . .
H23 H27 2.5562 no . .
H23 H28 3.5994 no . .
H24 H26 2.4836 no . .
H24 H27 2.9274 no . .
H24 H28 3.5439 no . .
H25 H26 3.5532 no . .
H25 H27 3.5809 no . .
H26 H45 3.1996 no . .
H28 H43 3.0392 no . .
H28 H45 3.2932 no . .
H29 H30 2.3128 no . .
H29 H31 2.3533 no . .
H29 H32 2.8155 no . .
H29 H33 2.8267 no . .
H29 H34 2.3585 no . .
H29 H35 2.3408 no . .
H29 H46 2.7900 no . .
H29 H50 3.4621 no . .
H29 H51 3.4678 no . .
H30 H34 3.5550 no . .
H31 H33 2.9874 no . .
H31 H34 2.5011 no . .
H31 H35 3.5598 no . .
H32 H33 2.6016 no . .
H32 H34 3.0003 no . .
H34 H51 3.4342 no . .
H36 H37 2.2906 no . .
H36 H39 3.5184 no . .
H36 H40 2.7061 no . .
H36 H41 3.5174 no . .
H36 H42 2.1213 no . .
H36 H44 3.2679 no . .
H37 H38 2.2872 no . .
H38 H48 3.2727 no . .
H38 H49 2.3107 no . .
H38 H50 3.4753 no . .
H38 H52 2.6164 no . .
H39 H40 2.2908 no . .
H39 H41 2.3209 no . .
H39 H42 2.7988 no . .
H39 H43 2.2996 no . .
H39 H44 2.8180 no . .
H39 H45 2.3424 no . .
H40 H44 3.5983 no . .
H40 H45 3.4737 no . .
H41 H43 3.4589 no . .
H41 H44 2.9355 no . .
H41 H45 2.3728 no . .
H42 H43 3.5804 no . .
H42 H44 2.5883 no . .
H42 H45 2.9290 no . .
H46 H47 2.3513 no . .
H46 H48 2.3160 no . .
H46 H49 2.8234 no . .
H46 H50 2.3537 no . .
H46 H51 2.3127 no . .
H46 H52 2.8189 no . .
H47 H50 3.5312 no . .
H47 H51 2.4881 no . .
H47 H52 2.8733 no . .
H48 H51 3.5520 no . .
H48 H52 3.5668 no . .
H49 H50 3.5874 no . .
H49 H51 3.0527 no . .
H49 H52 2.5503 no . .
O1 H5 3.4776 no . 4_464
O1 H17 2.3776 no . 2_545
O1 H21 3.4068 no . 4_465
O1 H25 2.6727 no . 2_545
O1 H26 2.9968 no . 4_565
O1 H45 3.5626 no . 4_565
O2 H4 3.5068 no . 4_464
O2 H5 2.7782 no . 4_464
O2 H17 2.8625 no . 2_545
O2 H18 3.2525 no . 2_545
N1 H5 3.5845 no . 4_464
C1 H5 3.0430 no . 4_464
C1 H17 2.9678 no . 2_545
C1 H26 3.3298 no . 4_565
C2 H14 3.4293 no . 4_465
C2 H45 3.4952 no . 4_565
C3 H31 3.4464 no . 3_676
C3 H44 3.4104 no . 4_565
C3 H45 3.2608 no . 4_565
C4 H28 3.4718 no . 4_565
C4 H31 3.5753 no . 3_676
C4 H44 3.4553 no . 4_565
C4 H45 3.2157 no . 4_565
C4 H47 3.3065 no . 3_676
C5 H30 3.2846 no . 3_676
C5 H44 3.5853 no . 4_565
C6 H10 2.9075 no . 4_565
C6 H20 3.1118 no . 1_556
C6 H30 2.9827 no . 3_676
C7 H10 3.5175 no . 4_565
C7 H19 3.2388 no . 1_556
C7 H20 3.0138 no . 1_556
C7 H30 3.1160 no . 3_676
C7 H37 3.2379 no . 2_546
C7 H38 3.3721 no . 2_546
C8 H13 3.4611 no . 4_465
C8 H30 3.4767 no . 3_676
C8 H31 3.5373 no . 3_676
C8 H38 3.3027 no . 2_546
C8 H44 3.4898 no . 4_565
C9 H14 3.4491 no . 4_465
C9 H31 3.2646 no . 3_676
C9 H47 3.5962 no . 3_676
C10 H5 3.0777 no . 4_464
C10 H36 3.4430 no . 3_576
C11 H4 3.4388 no . 4_464
C11 H5 2.9747 no . 4_464
C12 H4 3.3510 no . 4_464
C13 H4 3.5120 no . 4_464
C13 H18 2.8016 no . 2_545
C14 H18 2.7424 no . 2_545
C14 H27 3.4972 no . 4_565
C14 H47 3.5274 no . 3_676
C14 H49 3.2696 no . 3_676
C15 H1 3.1441 no . 4_564
C15 H7 3.1380 no . 4_564
C15 H18 2.7936 no . 2_545
C15 H23 3.5299 no . 4_565
C15 H39 3.4579 no . 2_545
C15 H40 3.1763 no . 2_545
C16 H1 2.7496 no . 4_564
C16 H8 3.4587 no . 4_564
C16 H18 2.8916 no . 2_545
C16 H39 3.5373 no . 2_545
C16 H40 3.0663 no . 2_545
C17 H1 3.4623 no . 4_564
C17 H18 2.9534 no . 2_545
C17 H48 3.2420 no . 2_545
C18 H4 3.4227 no . 4_464
C18 H18 2.9029 no . 2_545
C18 H48 3.2607 no . 2_545
C21 H4 3.4349 no . 3_676
C24 H6 3.2715 no . 1_554
C24 H30 3.4053 no . 3_675
C24 H32 3.1673 no . 3_675
C25 H6 3.1803 no . 1_554
C25 H30 3.2279 no . 3_675
C25 H32 3.5091 no . 3_675
C28 H24 3.3687 no . 3_575
C29 H13 3.5619 no . 4_464
C29 H24 3.2517 no . 3_575
C29 H39 3.2034 no . 3_575
C29 H41 3.0803 no . 3_575
C30 H3 3.3165 no . 4_464
C30 H12 3.4336 no . 4_464
C30 H47 3.4444 no . 2_545
C30 H48 3.2134 no . 2_545
C32 H19 3.3897 no . 3_675
C32 H20 3.5161 no . 3_675
C32 H40 3.3065 no . 1_655
C32 H41 3.1984 no . 1_655
C33 H41 3.3466 no . 1_655
C33 H42 3.1766 no . 1_655
C33 H52 3.0634 no . 3_676
C34 H14 3.5223 no . 2_555
C35 H14 2.9939 no . 2_555
C35 H37 3.5508 no . 3_576
C36 H10 3.5155 no . 3_576
C36 H14 3.0060 no . 2_555
C36 H36 3.2702 no . 3_576
C36 H37 3.2210 no . 3_576
C37 H6 3.4049 no . 2_556
C37 H10 3.3964 no . 3_576
C37 H14 3.5588 no . 2_555
C37 H36 3.0306 no . 3_576
C37 H44 3.1774 no . 3_576
C38 H6 3.3412 no . 2_556
C38 H15 3.4452 no . 2_555
C39 H15 3.4803 no . 2_555
C40 H14 3.4228 no . 2_555
C40 H23 3.5025 no . 3_575
C40 H24 3.5901 no . 3_575
C41 H8 3.5161 no . 3_576
C41 H13 3.4542 no . 2_555
C41 H14 3.2515 no . 2_555
C41 H23 3.1157 no . 3_575
C41 H31 3.2222 no . 1_455
C41 H32 3.1008 no . 1_455
C41 H33 3.1840 no . 1_455
C41 H34 3.3207 no . 1_455
C42 H37 3.2354 no . 3_576
C44 H3 3.1984 no . 3_676
C44 H12 3.0656 no . 3_676
C44 H15 3.5942 no . 2_555
C44 H27 3.0388 no . 2_555
C44 H28 3.4401 no . 2_555
C45 H34 3.4542 no . 3_676
C45 H35 3.5163 no . 3_676
C45 H50 3.1506 no . 3_676
C45 H51 3.3711 no . 3_676
H1 C15 3.1441 no . 4_465
H1 C16 2.7496 no . 4_465
H1 C17 3.4623 no . 4_465
H1 H13 3.2020 no . 4_465
H1 H14 2.5424 no . 4_465
H2 H21 3.0667 no . 4_465
H2 H33 3.2438 no . 4_465
H2 H41 3.5590 no . 4_565
H2 H45 2.8794 no . 4_565
H3 C30 3.3165 no . 4_565
H3 C44 3.1984 no . 3_676
H3 H26 3.0500 no . 4_565
H3 H27 3.5848 no . 4_565
H3 H28 2.8317 no . 4_565
H3 H45 3.2387 no . 4_565
H3 H47 2.5364 no . 3_676
H3 H48 3.0306 no . 3_676
H4 O2 3.5068 no . 4_565
H4 C11 3.4388 no . 4_565
H4 C12 3.3510 no . 4_565
H4 C13 3.5120 no . 4_565
H4 C18 3.4227 no . 4_565
H4 C21 3.4349 no . 3_676
H4 H16 3.1386 no . 4_565
H4 H17 3.5590 no . 3_676
H4 H18 3.2287 no . 3_676
H4 H28 3.5030 no . 4_565
H4 H46 3.4177 no . 3_676
H4 H47 3.5808 no . 3_676
H4 H48 3.1155 no . 3_676
H5 O1 3.4776 no . 4_565
H5 O2 2.7782 no . 4_565
H5 N1 3.5845 no . 4_565
H5 C1 3.0430 no . 4_565
H5 C10 3.0777 no . 4_565
H5 C11 2.9747 no . 4_565
H5 H10 2.3996 no . 4_565
H5 H17 3.1895 no . 3_676
H5 H20 2.7978 no . 1_556
H5 H30 3.2536 no . 3_676
H6 C24 3.2715 no . 1_556
H6 C25 3.1803 no . 1_556
H6 C37 3.4049 no . 2_546
H6 C38 3.3412 no . 2_546
H6 H10 3.5031 no . 4_565
H6 H15 2.8855 no . 1_556
H6 H19 2.7736 no . 1_556
H6 H20 2.6127 no . 1_556
H6 H30 3.4637 no . 3_676
H6 H37 3.1483 no . 2_546
H6 H38 3.0586 no . 2_546
H7 C15 3.1380 no . 4_465
H7 H13 2.7695 no . 4_465
H7 H19 3.5342 no . 1_556
H7 H38 2.9209 no . 2_546
H7 H49 3.2964 no . 2_546
H8 C16 3.4587 no . 4_465
H8 C41 3.5161 no . 3_576
H8 H14 2.6475 no . 4_465
H8 H31 2.7730 no . 3_676
H8 H36 3.2364 no . 3_576
H8 H40 2.8001 no . 3_576
H8 H42 3.3665 no . 3_576
H9 H31 2.8639 no . 3_676
H9 H47 2.8167 no . 3_676
H9 H51 2.8316 no . 3_676
H10 C6 2.9075 no . 4_464
H10 C7 3.5175 no . 4_464
H10 C36 3.5155 no . 3_576
H10 C37 3.3964 no . 3_576
H10 H5 2.3996 no . 4_464
H10 H6 3.5031 no . 4_464
H10 H36 3.1420 no . 3_576
H10 H37 2.9031 no . 3_576
H11 H36 3.0860 no . 3_576
H11 H37 3.5578 no . 3_576
H11 H51 3.2896 no . 3_676
H12 C30 3.4336 no . 4_565
H12 C44 3.0656 no . 3_676
H12 H18 3.2574 no . 2_545
H12 H26 3.2144 no . 4_565
H12 H27 2.7788 no . 4_565
H12 H47 2.6746 no . 3_676
H12 H49 2.5985 no . 3_676
H13 C8 3.4611 no . 4_564
H13 C29 3.5619 no . 4_565
H13 C41 3.4542 no . 2_545
H13 H1 3.2020 no . 4_564
H13 H7 2.7695 no . 4_564
H13 H18 3.3306 no . 2_545
H13 H19 3.4771 no . 4_565
H13 H23 2.7496 no . 4_565
H13 H27 3.1550 no . 4_565
H13 H39 3.2433 no . 2_545
H13 H40 2.6798 no . 2_545
H14 C2 3.4293 no . 4_564
H14 C9 3.4491 no . 4_564
H14 C34 3.5223 no . 2_545
H14 C35 2.9939 no . 2_545
H14 C36 3.0060 no . 2_545
H14 C37 3.5588 no . 2_545
H14 C40 3.4228 no . 2_545
H14 C41 3.2515 no . 2_545
H14 H1 2.5424 no . 4_564
H14 H8 2.6475 no . 4_564
H14 H18 3.4608 no . 2_545
H14 H36 3.1813 no . 2_545
H14 H39 3.3848 no . 2_545
H14 H40 2.4706 no . 2_545
H15 C38 3.4452 no . 2_545
H15 C39 3.4803 no . 2_545
H15 C44 3.5942 no . 2_545
H15 H6 2.8855 no . 1_554
H15 H18 3.5382 no . 2_545
H15 H48 2.8771 no . 2_545
H16 H4 3.1386 no . 4_464
H16 H18 3.4856 no . 2_545
H16 H48 2.9255 no . 2_545
H17 O1 2.3776 no . 2_555
H17 O2 2.8625 no . 2_555
H17 C1 2.9678 no . 2_555
H17 H4 3.5590 no . 3_676
H17 H5 3.1895 no . 3_676
H18 O2 3.2525 no . 2_555
H18 C13 2.8016 no . 2_555
H18 C14 2.7424 no . 2_555
H18 C15 2.7936 no . 2_555
H18 C16 2.8916 no . 2_555
H18 C17 2.9534 no . 2_555
H18 C18 2.9029 no . 2_555
H18 H4 3.2287 no . 3_676
H18 H12 3.2574 no . 2_555
H18 H13 3.3306 no . 2_555
H18 H14 3.4608 no . 2_555
H18 H15 3.5382 no . 2_555
H18 H16 3.4856 no . 2_555
H19 C7 3.2388 no . 1_554
H19 C32 3.3897 no . 3_675
H19 H6 2.7736 no . 1_554
H19 H7 3.5342 no . 1_554
H19 H13 3.4771 no . 4_464
H19 H30 3.0996 no . 3_675
H19 H32 2.8542 no . 3_675
H20 C6 3.1118 no . 1_554
H20 C7 3.0138 no . 1_554
H20 C32 3.5161 no . 3_675
H20 H5 2.7978 no . 1_554
H20 H6 2.6127 no . 1_554
H20 H30 2.7534 no . 3_675
H20 H32 3.4399 no . 3_675
H21 O1 3.4068 no . 4_564
H21 H2 3.0667 no . 4_564
H21 H41 3.4839 no . 1_655
H22 H24 2.7409 no . 3_575
H23 C15 3.5299 no . 4_464
H23 C40 3.5025 no . 3_575
H23 C41 3.1157 no . 3_575
H23 H13 2.7496 no . 4_464
H23 H32 3.0478 no . 3_675
H23 H39 2.9236 no . 3_575
H23 H40 2.9966 no . 3_575
H23 H41 2.5866 no . 3_575
H24 C28 3.3687 no . 3_575
H24 C29 3.2517 no . 3_575
H24 C40 3.5901 no . 3_575
H24 H22 2.7409 no . 3_575
H24 H24 2.6670 no . 3_575
H24 H25 3.3516 no . 3_575
H24 H26 3.3771 no . 3_575
H24 H39 2.7994 no . 3_575
H24 H41 3.3633 no . 3_575
H24 H45 3.5176 no . 3_575
H25 O1 2.6727 no . 2_555
H25 H24 3.3516 no . 3_575
H25 H26 3.3949 no . 3_575
H25 H32 3.5494 no . 3_675
H25 H39 3.3882 no . 3_575
H25 H41 2.8405 no . 3_575
H25 H45 3.2546 no . 3_575
H26 O1 2.9968 no . 4_464
H26 C1 3.3298 no . 4_464
H26 H3 3.0500 no . 4_464
H26 H12 3.2144 no . 4_464
H26 H24 3.3771 no . 3_575
H26 H25 3.3949 no . 3_575
H26 H47 3.4830 no . 2_545
H27 C14 3.4972 no . 4_464
H27 C44 3.0388 no . 2_545
H27 H3 3.5848 no . 4_464
H27 H12 2.7788 no . 4_464
H27 H13 3.1550 no . 4_464
H27 H47 2.9888 no . 2_545
H27 H48 2.7481 no . 2_545
H27 H49 2.8637 no . 2_545
H28 C4 3.4718 no . 4_464
H28 C44 3.4401 no . 2_545
H28 H3 2.8317 no . 4_464
H28 H4 3.5030 no . 4_464
H28 H47 3.3123 no . 2_545
H28 H48 2.8404 no . 2_545
H30 C5 3.2846 no . 3_676
H30 C6 2.9827 no . 3_676
H30 C7 3.1160 no . 3_676
H30 C8 3.4767 no . 3_676
H30 C24 3.4053 no . 3_675
H30 C25 3.2279 no . 3_675
H30 H5 3.2536 no . 3_676
H30 H6 3.4637 no . 3_676
H30 H19 3.0996 no . 3_675
H30 H20 2.7534 no . 3_675
H31 C3 3.4464 no . 3_676
H31 C4 3.5753 no . 3_676
H31 C8 3.5373 no . 3_676
H31 C9 3.2646 no . 3_676
H31 C41 3.2222 no . 1_655
H31 H8 2.7730 no . 3_676
H31 H9 2.8639 no . 3_676
H31 H40 2.7945 no . 1_655
H31 H41 3.1081 no . 1_655
H31 H42 3.2373 no . 1_655
H32 C24 3.1673 no . 3_675
H32 C25 3.5091 no . 3_675
H32 C41 3.1008 no . 1_655
H32 H19 2.8542 no . 3_675
H32 H20 3.4399 no . 3_675
H32 H23 3.0478 no . 3_675
H32 H25 3.5494 no . 3_675
H32 H40 2.9414 no . 1_655
H32 H41 2.5385 no . 1_655
H32 H42 3.3738 no . 1_655
H33 C41 3.1840 no . 1_655
H33 H2 3.2438 no . 4_564
H33 H41 2.7178 no . 1_655
H33 H42 2.8090 no . 1_655
H33 H52 3.5640 no . 3_676
H34 C41 3.3207 no . 1_655
H34 C45 3.4542 no . 3_676
H34 H38 3.5802 no . 3_676
H34 H40 3.5186 no . 1_655
H34 H41 3.2693 no . 1_655
H34 H42 2.6934 no . 1_655
H34 H50 3.4410 no . 3_676
H34 H52 2.6545 no . 3_676
H35 C45 3.5163 no . 3_676
H35 H52 2.6270 no . 3_676
H36 C10 3.4430 no . 3_576
H36 C36 3.2702 no . 3_576
H36 C37 3.0306 no . 3_576
H36 H8 3.2364 no . 3_576
H36 H10 3.1420 no . 3_576
H36 H11 3.0860 no . 3_576
H36 H14 3.1813 no . 2_555
H36 H36 3.3748 no . 3_576
H36 H37 2.9955 no . 3_576
H37 C7 3.2379 no . 2_556
H37 C35 3.5508 no . 3_576
H37 C36 3.2210 no . 3_576
H37 C42 3.2354 no . 3_576
H37 H6 3.1483 no . 2_556
H37 H10 2.9031 no . 3_576
H37 H11 3.5578 no . 3_576
H37 H36 2.9955 no . 3_576
H37 H42 3.3965 no . 3_576
H37 H44 2.3290 no . 3_576
H38 C7 3.3721 no . 2_556
H38 C8 3.3027 no . 2_556
H38 H6 3.0586 no . 2_556
H38 H7 2.9209 no . 2_556
H38 H34 3.5802 no . 3_676
H38 H42 3.5965 no . 3_576
H39 C15 3.4579 no . 2_555
H39 C16 3.5373 no . 2_555
H39 C29 3.2034 no . 3_575
H39 H13 3.2433 no . 2_555
H39 H14 3.3848 no . 2_555
H39 H23 2.9236 no . 3_575
H39 H24 2.7994 no . 3_575
H39 H25 3.3882 no . 3_575
H40 C15 3.1763 no . 2_555
H40 C16 3.0663 no . 2_555
H40 C32 3.3065 no . 1_455
H40 H8 2.8001 no . 3_576
H40 H13 2.6798 no . 2_555
H40 H14 2.4706 no . 2_555
H40 H23 2.9966 no . 3_575
H40 H31 2.7945 no . 1_455
H40 H32 2.9414 no . 1_455
H40 H34 3.5186 no . 1_455
H41 C29 3.0803 no . 3_575
H41 C32 3.1984 no . 1_455
H41 C33 3.3466 no . 1_455
H41 H2 3.5590 no . 4_464
H41 H21 3.4839 no . 1_455
H41 H23 2.5866 no . 3_575
H41 H24 3.3633 no . 3_575
H41 H25 2.8405 no . 3_575
H41 H31 3.1081 no . 1_455
H41 H32 2.5385 no . 1_455
H41 H33 2.7178 no . 1_455
H41 H34 3.2693 no . 1_455
H42 C33 3.1766 no . 1_455
H42 H8 3.3665 no . 3_576
H42 H31 3.2373 no . 1_455
H42 H32 3.3738 no . 1_455
H42 H33 2.8090 no . 1_455
H42 H34 2.6934 no . 1_455
H42 H37 3.3965 no . 3_576
H42 H38 3.5965 no . 3_576
H44 C3 3.4104 no . 4_464
H44 C4 3.4553 no . 4_464
H44 C5 3.5853 no . 4_464
H44 C8 3.4898 no . 4_464
H44 C37 3.1774 no . 3_576
H44 H37 2.3290 no . 3_576
H45 O1 3.5626 no . 4_464
H45 C2 3.4952 no . 4_464
H45 C3 3.2608 no . 4_464
H45 C4 3.2157 no . 4_464
H45 H2 2.8794 no . 4_464
H45 H3 3.2387 no . 4_464
H45 H24 3.5176 no . 3_575
H45 H25 3.2546 no . 3_575
H46 H4 3.4177 no . 3_676
H47 C4 3.3065 no . 3_676
H47 C9 3.5962 no . 3_676
H47 C14 3.5274 no . 3_676
H47 C30 3.4444 no . 2_555
H47 H3 2.5364 no . 3_676
H47 H4 3.5808 no . 3_676
H47 H9 2.8167 no . 3_676
H47 H12 2.6746 no . 3_676
H47 H26 3.4830 no . 2_555
H47 H27 2.9888 no . 2_555
H47 H28 3.3123 no . 2_555
H48 C17 3.2420 no . 2_555
H48 C18 3.2607 no . 2_555
H48 C30 3.2134 no . 2_555
H48 H3 3.0306 no . 3_676
H48 H4 3.1155 no . 3_676
H48 H15 2.8771 no . 2_555
H48 H16 2.9255 no . 2_555
H48 H27 2.7481 no . 2_555
H48 H28 2.8404 no . 2_555
H49 C14 3.2696 no . 3_676
H49 H7 3.2964 no . 2_556
H49 H12 2.5985 no . 3_676
H49 H27 2.8637 no . 2_555
H50 C45 3.1506 no . 3_676
H50 H34 3.4410 no . 3_676
H50 H50 2.9439 no . 3_676
H50 H51 2.7655 no . 3_676
H50 H52 3.2283 no . 3_676
H51 C45 3.3711 no . 3_676
H51 H9 2.8316 no . 3_676
H51 H11 3.2896 no . 3_676
H51 H50 2.7655 no . 3_676
H51 H51 3.3974 no . 3_676
H51 H52 3.4438 no . 3_676
H52 C33 3.0634 no . 3_676
H52 H33 3.5640 no . 3_676
H52 H34 2.6545 no . 3_676
H52 H35 2.6270 no . 3_676
H52 H50 3.2283 no . 3_676
H52 H51 3.4438 no . 3_676

#==============================================================================

#==============================================================================
# Additional structures and associated data_? identifiers
# should be added at this point if there is more than one 
# structure analysis in the CIF.

#==============================================================================
#     End of CIF
#==============================================================================
