# Supplementary material for: Synthesis of Alkenylgold(I) Complexes Relevant to Catalytic Carboxylative Cyclization of Unsaturated Amines and Alcohols
Source: Molecules. 2024 Mar 16;29(6):1331. doi: 10.3390/molecules29061331 (PMC10975222; doi:10.3390/molecules29061331)
Supplement: Supplementary file 1 [file molecules-29-01331-s001.zip › CIF9.cif]

data_General
_audit_creation_date                    2013-03-27
_audit_creation_method                 'by CrystalStructure 4.0'
_audit_update_record                    ?

#==============================================================================
# PROCESSING SUMMARY (IUCr Office Use Only)

_journal_date_recd_electronic           ?
_journal_date_from_coeditor             ?
_journal_date_accepted                  ?
_journal_coeditor_code                  ?

#==============================================================================
# SUBMISSION DETAILS

_publ_contact_author_name              'ENTER NAME'
_publ_contact_author_email             'ENTER EMAIL ADDRESS'
_publ_contact_author_fax               'ENTER FAX NUMBER'
_publ_contact_author_phone             'ENTER PHONE NUMBER'
_publ_contact_letter
;
    ENTER TEXT OF LETTER
;
_publ_requested_journal                'ENTER JOURNAL NAME HERE'
_publ_requested_category               'CHOOSE FI FM FO CI CM CO or AD'
_publ_requested_coeditor_name           ?

#==============================================================================
# TITLE AND AUTHOR LIST

_publ_section_title
;
    ENTER SECTION TITLE
;
_publ_section_title_footnote
;
    ENTER FOOTNOTE TO TITLE OF PAPER
;
loop_
_publ_author_name
_publ_author_footnote
_publ_author_address
' FIRST AUTHORS NAME '
;
  FIRST AUTHORS FOOTNOTES
;
;
  FIRST AUTHORS ADDRESS
;
_publ_section_synopsis
;
    ENTER SYNOPSIS
;

#==============================================================================
# TEXT

_publ_section_abstract
;
    ENTER ABSTRACT
;
_publ_section_comment
;
    ENTER TEXT
;
_publ_section_references
;
    ENTER OTHER REFERENCES

    Rigaku (2010). CrystalStructure. Version 4.0. 
    Rigaku Corporation, Tokyo, Japan.

    Burla, M.C., Camalli, M., Carrozzini, B., Cascarano, G.L., 
    Giacovazzo, C., Polidori, G., Spagna., R. 
    (2003). 
    SIR2002

    Carruthers, J.R., Rollett,J.S., Betteridge, P.W.,
	 Kinna, D., Pearce, L., Larsen, A., and Gabe, E.(1999)
    CRYSTALS Issue 11, Chemical Crystallography Laboratory, Oxford, UK.

    Rigaku (1998). REQAB. 
    Rigaku Corporation, Tokyo, Japan.

;
_publ_section_figure_captions
;
    ENTER FIGURE CAPTIONS
;
_publ_section_exptl_prep
;
    ENTER COMPOUND PREPARATION DETAILS
;
_publ_section_exptl_refinement
;
    ENTER SPECIAL DETAILS OF THE REFINEMENT
;

#==============================================================================
data_IPrAuCH3CCCH2OCO2v3

#==============================================================================
# CHEMICAL DATA

_chemical_formula_sum                  'C32 H41 Au N2 O3'
_chemical_formula_moiety               'C32 H41 Au N2 O3'
_chemical_formula_weight                698.65
_chemical_melting_point                 ?

#==============================================================================
# CRYSTAL DATA
_symmetry_cell_setting                  orthorhombic
_symmetry_space_group_name_H-M         'P b c a'
_symmetry_space_group_name_Hall        '-P 2ac 2ab'
_symmetry_Int_Tables_number             61
loop_
_symmetry_equiv_pos_site_id
_symmetry_equiv_pos_as_xyz
1   '+X,+Y,+Z'
2   '1/2-X,1/2+Y,+Z'
3   '+X,1/2-Y,1/2+Z'
4   '1/2-X,-Y,1/2+Z'
5   '-X,-Y,-Z'
6   '1/2+X,1/2-Y,-Z'
7   '-X,1/2+Y,1/2-Z'
8   '1/2+X,+Y,1/2-Z'
#------------------------------------------------------------------------------
_cell_length_a                          15.7294(14)
_cell_length_b                          17.4152(16)
_cell_length_c                          22.599(3)
_cell_angle_alpha                       90.0000
_cell_angle_beta                        90.0000
_cell_angle_gamma                       90.0000
_cell_volume                            6190.7(10)
_cell_formula_units_Z                   8
_cell_measurement_reflns_used           7068
_cell_measurement_theta_min             3.16
_cell_measurement_theta_max             27.49
_cell_measurement_temperature           93
#------------------------------------------------------------------------------
_exptl_crystal_description              prism
_exptl_crystal_colour                   colorless
_exptl_crystal_size_max                 0.150
_exptl_crystal_size_mid                 0.120
_exptl_crystal_size_min                 0.070
_exptl_crystal_density_diffrn           1.499
_exptl_crystal_density_meas             ?
_exptl_crystal_density_method          'not measured'
_exptl_crystal_F_000                    2800.00
_exptl_absorpt_coefficient_mu           4.802
_exptl_absorpt_correction_type          multi-scan
_exptl_absorpt_process_details         'REQAB (Rigaku, 1998)'
_exptl_absorpt_correction_T_min         0.562
_exptl_absorpt_correction_T_max         0.715

#==============================================================================
# EXPERIMENTAL DATA

_diffrn_ambient_temperature             93
_diffrn_radiation_type                 'Mo K\a'
_diffrn_radiation_wavelength            0.71075
_diffrn_measurement_device_type        'Rigaku Saturn724'
_diffrn_measurement_method              \w
_diffrn_detector_area_resol_mean        7.111
_diffrn_reflns_number                   48693
_diffrn_reflns_av_R_equivalents         0.0395
_diffrn_reflns_theta_max                27.50
_diffrn_reflns_theta_full               27.50
_diffrn_measured_fraction_theta_max     0.996
_diffrn_measured_fraction_theta_full    0.996
_diffrn_reflns_limit_h_min             -20
_diffrn_reflns_limit_h_max              17
_diffrn_reflns_limit_k_min             -16
_diffrn_reflns_limit_k_max              22
_diffrn_reflns_limit_l_min             -29
_diffrn_reflns_limit_l_max              29
_diffrn_standards_number                0
_diffrn_standards_interval_count        .
_diffrn_standards_decay_%               ?

#==============================================================================
# REFINEMENT DATA

_refine_special_details
;
    Refinement was performed using all reflections. The weighted 
    R-factor (wR) and goodness of fit (S) are based on F^2^.
    R-factor (gt) are based on F. The threshold expression of
    F^2^ > 2.0 sigma(F^2^) is used only for calculating R-factor (gt).
;
_reflns_number_total                    7084
_reflns_number_gt                       6057
_reflns_threshold_expression            F^2^>2.0\s(F^2^)
_refine_ls_structure_factor_coef        Fsqd
_refine_ls_R_factor_gt                  0.0310
_refine_ls_wR_factor_ref                0.0897
_refine_ls_number_restraints            ?
_refine_ls_hydrogen_treatment           constr
_refine_ls_number_reflns                7068
_refine_ls_number_parameters            384
_refine_ls_goodness_of_fit_ref          1.000
_refine_ls_weighting_scheme             calc
_refine_ls_weighting_details
                               'w = 1/[0.0010Fo^2^ + 0.9770\s(Fo^2^)]/(4Fo^2^)'
_atom_sites_solution_hydrogens          geom
_atom_sites_solution_primary            direct
_atom_sites_solution_secondary          difmap
_refine_ls_shift/su_max                 0.000
_refine_diff_density_max                3.130
_refine_diff_density_min               -1.020
_refine_ls_extinction_method            none
_refine_ls_extinction_coef              ?

loop_
_atom_type_symbol
_atom_type_description
_atom_type_scat_dispersion_real
_atom_type_scat_dispersion_imag
_atom_type_scat_source
  'C' 'C'  0.0033 0.0016 
;
International Tables for Crystallography
(1992, Vol. C, Tables 4.2.6.8 and 6.1.1.4)
;
  'H' 'H'  0.0000 0.0000 
;
International Tables for Crystallography
(1992, Vol. C, Table 6.1.1.4)
;
  'Au' 'Au'  -2.0133 8.8022 
;
International Tables for Crystallography
(1992, Vol. C, Tables 4.2.6.8 and 6.1.1.4)
;
  'N' 'N'  0.0061 0.0033 
;
International Tables for Crystallography
(1992, Vol. C, Tables 4.2.6.8 and 6.1.1.4)
;
  'O' 'O'  0.0106 0.0060 
;
International Tables for Crystallography
(1992, Vol. C, Tables 4.2.6.8 and 6.1.1.4)
;

#==============================================================================
# ATOMIC COORDINATES AND THERMAL PARAMETERS

loop_
_atom_site_label
_atom_site_type_symbol
_atom_site_fract_x
_atom_site_fract_y
_atom_site_fract_z
_atom_site_U_iso_or_equiv
_atom_site_adp_type
_atom_site_occupancy
_atom_site_symmetry_multiplicity
_atom_site_calc_flag
_atom_site_refinement_flags
_atom_site_disorder_assembly
_atom_site_disorder_group
 Au1 Au 0.348540(10) 0.297220(10) 0.073390(10) 0.01370(5) Uani 1.0 8 d . . .
 O1 O 0.35437(15) 0.44811(16) -0.07543(10) 0.0246(8) Uani 1.0 8 d . . .
 O2 O 0.3206(2) 0.46682(16) -0.17080(12) 0.0444(9) Uani 1.0 8 d . . .
 O3 O 0.28604(16) 0.35707(14) -0.12520(11) 0.0293(7) Uani 1.0 8 d . . .
 N1 N 0.34830(14) 0.19157(15) 0.18131(13) 0.0160(7) Uani 1.0 8 d . . .
 N2 N 0.26002(16) 0.15263(14) 0.11532(11) 0.0164(7) Uani 1.0 8 d . . .
 C1 C 0.3210(3) 0.4277(3) -0.12740(16) 0.0305(10) Uani 1.0 8 d . . .
 C2 C 0.2952(3) 0.3263(2) -0.06630(15) 0.0254(10) Uani 1.0 8 d . . .
 C3 C 0.34408(18) 0.38688(19) -0.03373(15) 0.0180(8) Uani 1.0 8 d . . .
 C4 C 0.3710(2) 0.39042(18) 0.02155(14) 0.0173(8) Uani 1.0 8 d . . .
 C5 C 0.4138(2) 0.46110(18) 0.04640(15) 0.0226(9) Uani 1.0 8 d . . .
 C6 C 0.3191(2) 0.20701(16) 0.12614(15) 0.0154(8) Uani 1.0 8 d . . .
 C7 C 0.3072(2) 0.12797(18) 0.20505(15) 0.0210(9) Uani 1.0 8 d . . .
 C8 C 0.2519(2) 0.10409(18) 0.16354(14) 0.0195(8) Uani 1.0 8 d . . .
 C9 C 0.41762(19) 0.23441(17) 0.20675(14) 0.0177(8) Uani 1.0 8 d . . .
 C10 C 0.4005(2) 0.30414(19) 0.23425(16) 0.0220(9) Uani 1.0 8 d . . .
 C11 C 0.4695(3) 0.3472(3) 0.25321(17) 0.0316(10) Uani 1.0 8 d . . .
 C12 C 0.5520(3) 0.3219(3) 0.24509(19) 0.0360(12) Uani 1.0 8 d . . .
 C13 C 0.5671(3) 0.2518(3) 0.21863(18) 0.0315(10) Uani 1.0 8 d . . .
 C14 C 0.5001(2) 0.20610(17) 0.19836(16) 0.0214(9) Uani 1.0 8 d . . .
 C15 C 0.3103(2) 0.33437(19) 0.24360(15) 0.0213(9) Uani 1.0 8 d . . .
 C16 C 0.2962(3) 0.4110(2) 0.21215(16) 0.0276(10) Uani 1.0 8 d . . .
 C17 C 0.2910(3) 0.3409(3) 0.30971(16) 0.0336(11) Uani 1.0 8 d . . .
 C18 C 0.5177(2) 0.13159(19) 0.16532(16) 0.0244(9) Uani 1.0 8 d . . .
 C19 C 0.5519(3) 0.1497(3) 0.10332(18) 0.0333(11) Uani 1.0 8 d . . .
 C20 C 0.5783(3) 0.0795(3) 0.1994(2) 0.0429(12) Uani 1.0 8 d . . .
 C21 C 0.2146(2) 0.14842(18) 0.05992(14) 0.0171(8) Uani 1.0 8 d . . .
 C22 C 0.25539(18) 0.11327(17) 0.01199(14) 0.0172(8) Uani 1.0 8 d . . .
 C23 C 0.2116(2) 0.11248(19) -0.04188(15) 0.0224(9) Uani 1.0 8 d . . .
 C24 C 0.1319(3) 0.1449(2) -0.04672(16) 0.0266(10) Uani 1.0 8 d . . .
 C25 C 0.0934(2) 0.17908(19) 0.00127(16) 0.0246(9) Uani 1.0 8 d . . .
 C26 C 0.1343(2) 0.1819(2) 0.05578(16) 0.0194(8) Uani 1.0 8 d . . .
 C27 C 0.34239(18) 0.0764(2) 0.01787(17) 0.0232(9) Uani 1.0 8 d . . .
 C28 C 0.3365(3) -0.0064(3) 0.0354(4) 0.073(2) Uani 1.0 8 d . . .
 C29 C 0.3945(4) 0.0832(4) -0.0380(3) 0.091(3) Uani 1.0 8 d . . .
 C30 C 0.0937(2) 0.2236(2) 0.10799(17) 0.0239(9) Uani 1.0 8 d . . .
 C31 C 0.0086(3) 0.1896(3) 0.1244(2) 0.0533(15) Uani 1.0 8 d . . .
 C32 C 0.0920(4) 0.3103(3) 0.0952(3) 0.0591(17) Uani 1.0 8 d . . .
 H1 H 0.2392 0.3174 -0.0498 0.0305 Uiso 1.0 8 calc R . .
 H2 H 0.3257 0.2779 -0.0686 0.0304 Uiso 1.0 8 calc R . .
 H3 H 0.3823 0.4793 0.0799 0.0272 Uiso 1.0 8 calc R . .
 H4 H 0.4708 0.4490 0.0584 0.0273 Uiso 1.0 8 calc R . .
 H5 H 0.4153 0.5002 0.0165 0.0272 Uiso 1.0 8 calc R . .
 H6 H 0.3165 0.1062 0.2421 0.0254 Uiso 1.0 8 calc R . .
 H7 H 0.2146 0.0628 0.1665 0.0235 Uiso 1.0 8 calc R . .
 H8 H 0.4602 0.3941 0.2718 0.0378 Uiso 1.0 8 calc R . .
 H9 H 0.5975 0.3522 0.2571 0.0432 Uiso 1.0 8 calc R . .
 H10 H 0.6226 0.2344 0.2143 0.0377 Uiso 1.0 8 calc R . .
 H11 H 0.2708 0.2969 0.2266 0.0256 Uiso 1.0 8 calc R . .
 H12 H 0.2400 0.4295 0.2205 0.0332 Uiso 1.0 8 calc R . .
 H13 H 0.3373 0.4476 0.2261 0.0332 Uiso 1.0 8 calc R . .
 H14 H 0.3028 0.4042 0.1702 0.0334 Uiso 1.0 8 calc R . .
 H15 H 0.3277 0.3788 0.3270 0.0403 Uiso 1.0 8 calc R . .
 H16 H 0.2328 0.3560 0.3151 0.0405 Uiso 1.0 8 calc R . .
 H17 H 0.3004 0.2923 0.3286 0.0404 Uiso 1.0 8 calc R . .
 H18 H 0.4636 0.1044 0.1606 0.0291 Uiso 1.0 8 calc R . .
 H19 H 0.5104 0.1790 0.0818 0.0399 Uiso 1.0 8 calc R . .
 H20 H 0.6032 0.1792 0.1070 0.0399 Uiso 1.0 8 calc R . .
 H21 H 0.5637 0.1029 0.0824 0.0401 Uiso 1.0 8 calc R . .
 H22 H 0.5544 0.0670 0.2373 0.0515 Uiso 1.0 8 calc R . .
 H23 H 0.5875 0.0332 0.1773 0.0516 Uiso 1.0 8 calc R . .
 H24 H 0.6315 0.1056 0.2049 0.0515 Uiso 1.0 8 calc R . .
 H25 H 0.2367 0.0899 -0.0748 0.0267 Uiso 1.0 8 calc R . .
 H26 H 0.1036 0.1438 -0.0828 0.0320 Uiso 1.0 8 calc R . .
 H27 H 0.0395 0.2004 -0.0026 0.0295 Uiso 1.0 8 calc R . .
 H28 H 0.3732 0.1043 0.0489 0.0279 Uiso 1.0 8 calc R . .
 H29 H 0.3050 -0.0346 0.0062 0.0873 Uiso 1.0 8 calc R . .
 H30 H 0.3924 -0.0280 0.0391 0.0872 Uiso 1.0 8 calc R . .
 H31 H 0.3078 -0.0096 0.0728 0.0874 Uiso 1.0 8 calc R . .
 H32 H 0.3668 0.0544 -0.0687 0.1097 Uiso 1.0 8 calc R . .
 H33 H 0.3986 0.1361 -0.0497 0.1095 Uiso 1.0 8 calc R . .
 H34 H 0.4504 0.0629 -0.0315 0.1094 Uiso 1.0 8 calc R . .
 H35 H 0.1309 0.2159 0.1422 0.0286 Uiso 1.0 8 calc R . .
 H36 H 0.0137 0.1351 0.1294 0.0638 Uiso 1.0 8 calc R . .
 H37 H -0.0113 0.2123 0.1606 0.0640 Uiso 1.0 8 calc R . .
 H38 H -0.0311 0.2003 0.0932 0.0640 Uiso 1.0 8 calc R . .
 H39 H 0.0595 0.3196 0.0600 0.0710 Uiso 1.0 8 calc R . .
 H40 H 0.0665 0.3371 0.1278 0.0709 Uiso 1.0 8 calc R . .
 H41 H 0.1491 0.3283 0.0896 0.0711 Uiso 1.0 8 calc R . .


loop_
_atom_site_aniso_label
_atom_site_aniso_U_11
_atom_site_aniso_U_22
_atom_site_aniso_U_33
_atom_site_aniso_U_12
_atom_site_aniso_U_13
_atom_site_aniso_U_23
 Au1 0.01492(9) 0.01158(9) 0.01460(9) -0.00157(4) -0.00001(4) 0.00264(4)
 O1 0.0436(17) 0.0158(14) 0.0145(13) -0.0026(10) 0.0017(9) 0.0022(9)
 O2 0.083(2) 0.0298(16) 0.0203(14) 0.0050(15) -0.0053(15) 0.0029(12)
 O3 0.0417(15) 0.0246(13) 0.0216(13) 0.0016(12) -0.0076(11) -0.0021(11)
 N1 0.0198(15) 0.0162(14) 0.0119(14) -0.0019(10) -0.0011(10) 0.0037(11)
 N2 0.0188(13) 0.0128(13) 0.0176(13) -0.0011(11) 0.0000(11) 0.0019(10)
 C1 0.044(2) 0.027(2) 0.0205(18) 0.0077(18) -0.0008(16) -0.0035(15)
 C2 0.030(2) 0.0225(19) 0.0233(18) -0.0019(16) -0.0038(14) 0.0031(14)
 C3 0.0243(18) 0.0105(15) 0.0192(17) 0.0008(12) 0.0010(12) 0.0042(13)
 C4 0.0193(15) 0.0133(15) 0.0192(16) 0.0016(13) 0.0020(13) 0.0015(13)
 C5 0.0279(18) 0.0180(17) 0.0218(17) -0.0037(14) -0.0005(14) 0.0000(14)
 C6 0.0132(15) 0.0151(16) 0.0180(16) 0.0009(12) -0.0012(13) 0.0008(12)
 C7 0.0258(18) 0.0176(16) 0.0198(16) -0.0009(13) 0.0016(13) 0.0056(13)
 C8 0.0227(16) 0.0170(16) 0.0188(15) -0.0030(13) 0.0061(13) 0.0043(13)
 C9 0.0243(17) 0.0139(15) 0.0150(15) -0.0035(13) -0.0038(12) 0.0033(12)
 C10 0.0250(19) 0.0225(18) 0.0185(17) -0.0030(13) -0.0044(13) -0.0003(13)
 C11 0.034(2) 0.0266(19) 0.034(2) -0.0057(16) -0.0079(17) -0.0088(16)
 C12 0.030(3) 0.036(3) 0.042(3) -0.0059(18) -0.0100(18) -0.0075(19)
 C13 0.0234(18) 0.034(2) 0.037(3) -0.0006(16) -0.0055(16) -0.0022(17)
 C14 0.0199(17) 0.0203(18) 0.0239(18) -0.0010(13) -0.0030(14) 0.0032(13)
 C15 0.0274(18) 0.0137(16) 0.0229(17) 0.0007(14) -0.0022(14) -0.0006(13)
 C16 0.033(2) 0.0211(18) 0.0289(19) 0.0003(15) 0.0016(15) 0.0018(15)
 C17 0.042(3) 0.035(3) 0.0244(19) 0.0014(17) 0.0080(16) 0.0023(17)
 C18 0.0212(17) 0.0232(18) 0.0288(19) 0.0032(14) 0.0002(14) 0.0022(15)
 C19 0.034(2) 0.031(2) 0.035(3) 0.0030(17) 0.0054(17) 0.0018(17)
 C20 0.049(3) 0.033(3) 0.046(3) 0.012(2) -0.002(2) 0.008(2)
 C21 0.0183(16) 0.0114(15) 0.0216(16) -0.0030(12) -0.0002(13) 0.0035(13)
 C22 0.0152(15) 0.0146(15) 0.0220(16) -0.0040(12) -0.0005(12) 0.0001(12)
 C23 0.0287(18) 0.0210(17) 0.0175(16) -0.0060(14) 0.0002(13) -0.0015(13)
 C24 0.0309(19) 0.0260(19) 0.0228(18) -0.0076(16) -0.0087(15) 0.0045(15)
 C25 0.0203(18) 0.0198(17) 0.034(2) -0.0036(14) -0.0057(14) 0.0060(15)
 C26 0.0189(16) 0.0152(16) 0.0242(18) -0.0017(13) -0.0037(14) 0.0026(14)
 C27 0.0163(17) 0.0235(19) 0.030(2) -0.0019(13) 0.0016(13) -0.0015(16)
 C28 0.024(3) 0.033(3) 0.162(7) 0.0047(18) -0.005(3) 0.032(4)
 C29 0.052(4) 0.133(6) 0.088(5) 0.056(4) 0.042(3) 0.074(5)
 C30 0.0205(17) 0.0226(17) 0.0285(19) 0.0041(14) 0.0035(14) -0.0007(15)
 C31 0.033(3) 0.087(4) 0.040(3) -0.027(3) 0.010(2) -0.020(3)
 C32 0.077(4) 0.038(3) 0.062(4) 0.024(3) 0.024(3) 0.002(3)

#==============================================================================
_computing_data_collection             'CrystalClear (Rigaku Inc., 2008)'
_computing_cell_refinement              CrystalClear
_computing_data_reduction               CrystalClear
_computing_structure_solution          'SIR2002 (Burla, et al., 2003)'
_computing_structure_refinement        'CRYSTALS (Carruthers, et al., 1999)'
_computing_publication_material        'CrystalStructure 4.0 (Rigaku, 2010)'
_computing_molecular_graphics          'CrystalStructure 4.0'

#==============================================================================
# MOLECULAR GEOMETRY

_geom_special_details
;
    ENTER SPECIAL DETAILS OF THE MOLECULAR GEOMETRY
;

loop_
_geom_bond_atom_site_label_1
_geom_bond_atom_site_label_2
_geom_bond_distance
_geom_bond_publ_flag
_geom_bond_site_symmetry_1
_geom_bond_site_symmetry_2
Au1 C4 2.033(4) yes . .
Au1 C6 2.026(3) yes . .
O1 C1 1.335(5) yes . .
O1 C3 1.432(5) yes . .
O2 C1 1.194(5) yes . .
O3 C1 1.349(5) yes . .
O3 C2 1.442(5) yes . .
N1 C6 1.355(5) yes . .
N1 C7 1.390(4) yes . .
N1 C9 1.441(4) yes . .
N2 C6 1.350(4) yes . .
N2 C8 1.385(4) yes . .
N2 C21 1.443(4) yes . .
C2 C3 1.499(5) yes . .
C3 C4 1.321(5) yes . .
C4 C5 1.511(5) yes . .
C7 C8 1.345(5) yes . .
C9 C10 1.390(5) yes . .
C9 C14 1.400(5) yes . .
C10 C11 1.388(5) yes . .
C10 C15 1.528(5) yes . .
C11 C12 1.383(6) yes . .
C12 C13 1.379(6) yes . .
C13 C14 1.398(5) yes . .
C14 C18 1.523(5) yes . .
C15 C16 1.528(5) yes . .
C15 C17 1.529(5) yes . .
C18 C19 1.534(6) yes . .
C18 C20 1.524(6) yes . .
C21 C22 1.400(5) yes . .
C21 C26 1.395(5) yes . .
C22 C23 1.399(5) yes . .
C22 C27 1.517(5) yes . .
C23 C24 1.379(5) yes . .
C24 C25 1.377(5) yes . .
C25 C26 1.390(5) yes . .
C26 C30 1.525(5) yes . .
C27 C28 1.500(7) yes . .
C27 C29 1.510(7) yes . .
C30 C31 1.509(6) yes . .
C30 C32 1.537(6) yes . .
C2 H1 0.970 no . .
C2 H2 0.970 no . .
C5 H3 0.960 no . .
C5 H4 0.960 no . .
C5 H5 0.960 no . .
C7 H6 0.930 no . .
C8 H7 0.930 no . .
C11 H8 0.930 no . .
C12 H9 0.930 no . .
C13 H10 0.930 no . .
C15 H11 0.980 no . .
C16 H12 0.960 no . .
C16 H13 0.960 no . .
C16 H14 0.960 no . .
C17 H15 0.960 no . .
C17 H16 0.960 no . .
C17 H17 0.960 no . .
C18 H18 0.980 no . .
C19 H19 0.960 no . .
C19 H20 0.960 no . .
C19 H21 0.960 no . .
C20 H22 0.960 no . .
C20 H23 0.960 no . .
C20 H24 0.960 no . .
C23 H25 0.930 no . .
C24 H26 0.930 no . .
C25 H27 0.930 no . .
C27 H28 0.980 no . .
C28 H29 0.960 no . .
C28 H30 0.960 no . .
C28 H31 0.960 no . .
C29 H32 0.960 no . .
C29 H33 0.960 no . .
C29 H34 0.960 no . .
C30 H35 0.980 no . .
C31 H36 0.960 no . .
C31 H37 0.960 no . .
C31 H38 0.960 no . .
C32 H39 0.960 no . .
C32 H40 0.960 no . .
C32 H41 0.960 no . .

loop_
_geom_angle_atom_site_label_1
_geom_angle_atom_site_label_2
_geom_angle_atom_site_label_3
_geom_angle
_geom_angle_publ_flag
_geom_angle_site_symmetry_1
_geom_angle_site_symmetry_2
_geom_angle_site_symmetry_3
C4 Au1 C6 176.55(13) yes . . .
C1 O1 C3 109.7(3) yes . . .
C1 O3 C2 109.4(3) yes . . .
C6 N1 C7 110.8(3) yes . . .
C6 N1 C9 121.4(3) yes . . .
C7 N1 C9 127.6(3) yes . . .
C6 N2 C8 110.5(3) yes . . .
C6 N2 C21 122.3(3) yes . . .
C8 N2 C21 127.3(3) yes . . .
O1 C1 O2 125.0(4) yes . . .
O1 C1 O3 111.8(3) yes . . .
O2 C1 O3 123.3(4) yes . . .
O3 C2 C3 104.1(3) yes . . .
O1 C3 C2 105.0(3) yes . . .
O1 C3 C4 123.5(3) yes . . .
C2 C3 C4 131.5(3) yes . . .
Au1 C4 C3 116.9(3) yes . . .
Au1 C4 C5 120.9(3) yes . . .
C3 C4 C5 122.2(3) yes . . .
Au1 C6 N1 128.2(3) yes . . .
Au1 C6 N2 126.5(3) yes . . .
N1 C6 N2 105.1(3) yes . . .
N1 C7 C8 106.1(3) yes . . .
N2 C8 C7 107.5(3) yes . . .
N1 C9 C10 118.9(3) yes . . .
N1 C9 C14 117.7(3) yes . . .
C10 C9 C14 123.2(3) yes . . .
C9 C10 C11 117.3(3) yes . . .
C9 C10 C15 122.9(3) yes . . .
C11 C10 C15 119.8(3) yes . . .
C10 C11 C12 121.4(4) yes . . .
C11 C12 C13 120.1(4) yes . . .
C12 C13 C14 121.0(4) yes . . .
C9 C14 C13 117.0(3) yes . . .
C9 C14 C18 122.3(3) yes . . .
C13 C14 C18 120.6(3) yes . . .
C10 C15 C16 111.8(3) yes . . .
C10 C15 C17 110.2(3) yes . . .
C16 C15 C17 111.1(3) yes . . .
C14 C18 C19 109.7(3) yes . . .
C14 C18 C20 111.9(3) yes . . .
C19 C18 C20 111.4(3) yes . . .
N2 C21 C22 117.8(3) yes . . .
N2 C21 C26 119.0(3) yes . . .
C22 C21 C26 123.1(3) yes . . .
C21 C22 C23 116.9(3) yes . . .
C21 C22 C27 122.0(3) yes . . .
C23 C22 C27 121.1(3) yes . . .
C22 C23 C24 120.8(3) yes . . .
C23 C24 C25 120.9(4) yes . . .
C24 C25 C26 120.7(4) yes . . .
C21 C26 C25 117.6(4) yes . . .
C21 C26 C30 121.8(3) yes . . .
C25 C26 C30 120.6(3) yes . . .
C22 C27 C28 112.0(3) yes . . .
C22 C27 C29 112.5(4) yes . . .
C28 C27 C29 109.2(5) yes . . .
C26 C30 C31 112.0(4) yes . . .
C26 C30 C32 109.2(4) yes . . .
C31 C30 C32 114.6(4) yes . . .
O3 C2 H1 108.885 no . . .
O3 C2 H2 108.789 no . . .
C3 C2 H1 112.940 no . . .
C3 C2 H2 112.641 no . . .
H1 C2 H2 109.293 no . . .
C4 C5 H3 109.402 no . . .
C4 C5 H4 109.989 no . . .
C4 C5 H5 109.107 no . . .
H3 C5 H4 109.445 no . . .
H3 C5 H5 109.441 no . . .
H4 C5 H5 109.441 no . . .
N1 C7 H6 126.747 no . . .
C8 C7 H6 127.106 no . . .
N2 C8 H7 125.944 no . . .
C7 C8 H7 126.587 no . . .
C10 C11 H8 119.402 no . . .
C12 C11 H8 119.246 no . . .
C11 C12 H9 120.074 no . . .
C13 C12 H9 119.803 no . . .
C12 C13 H10 119.777 no . . .
C14 C13 H10 119.189 no . . .
C10 C15 H11 107.776 no . . .
C16 C15 H11 107.903 no . . .
C17 C15 H11 107.896 no . . .
C15 C16 H12 109.617 no . . .
C15 C16 H13 109.263 no . . .
C15 C16 H14 109.624 no . . .
H12 C16 H13 109.438 no . . .
H12 C16 H14 109.448 no . . .
H13 C16 H14 109.437 no . . .
C15 C17 H15 109.258 no . . .
C15 C17 H16 109.490 no . . .
C15 C17 H17 109.757 no . . .
H15 C17 H16 109.439 no . . .
H15 C17 H17 109.436 no . . .
H16 C17 H17 109.447 no . . .
C14 C18 H18 107.898 no . . .
C19 C18 H18 107.813 no . . .
C20 C18 H18 108.056 no . . .
C18 C19 H19 109.472 no . . .
C18 C19 H20 109.003 no . . .
C18 C19 H21 110.021 no . . .
H19 C19 H20 109.450 no . . .
H19 C19 H21 109.438 no . . .
H20 C19 H21 109.442 no . . .
C18 C20 H22 109.881 no . . .
C18 C20 H23 109.344 no . . .
C18 C20 H24 109.275 no . . .
H22 C20 H23 109.446 no . . .
H22 C20 H24 109.440 no . . .
H23 C20 H24 109.440 no . . .
C22 C23 H25 119.436 no . . .
C24 C23 H25 119.736 no . . .
C23 C24 H26 119.785 no . . .
C25 C24 H26 119.280 no . . .
C24 C25 H27 119.975 no . . .
C26 C25 H27 119.356 no . . .
C22 C27 H28 107.418 no . . .
C28 C27 H28 108.482 no . . .
C29 C27 H28 106.970 no . . .
C27 C28 H29 109.987 no . . .
C27 C28 H30 110.052 no . . .
C27 C28 H31 108.456 no . . .
H29 C28 H30 109.440 no . . .
H29 C28 H31 109.443 no . . .
H30 C28 H31 109.444 no . . .
C27 C29 H32 108.514 no . . .
C27 C29 H33 110.047 no . . .
C27 C29 H34 109.936 no . . .
H32 C29 H33 109.444 no . . .
H32 C29 H34 109.447 no . . .
H33 C29 H34 109.434 no . . .
C26 C30 H35 107.174 no . . .
C31 C30 H35 106.408 no . . .
C32 C30 H35 107.064 no . . .
C30 C31 H36 110.131 no . . .
C30 C31 H37 109.661 no . . .
C30 C31 H38 108.717 no . . .
H36 C31 H37 109.443 no . . .
H36 C31 H38 109.433 no . . .
H37 C31 H38 109.439 no . . .
C30 C32 H39 109.365 no . . .
C30 C32 H40 109.845 no . . .
C30 C32 H41 109.288 no . . .
H39 C32 H40 109.441 no . . .
H39 C32 H41 109.446 no . . .
H40 C32 H41 109.442 no . . .

loop_
_geom_torsion_atom_site_label_1
_geom_torsion_atom_site_label_2
_geom_torsion_atom_site_label_3
_geom_torsion_atom_site_label_4
_geom_torsion
_geom_torsion_publ_flag
_geom_torsion_site_symmetry_1
_geom_torsion_site_symmetry_2
_geom_torsion_site_symmetry_3
_geom_torsion_site_symmetry_4
C1 O1 C3 C2 -2.8(4) no . . . .
C1 O1 C3 C4 179.9(3) no . . . .
C3 O1 C1 O2 -179.4(4) no . . . .
C3 O1 C1 O3 1.4(4) no . . . .
C1 O3 C2 C3 -2.4(4) no . . . .
C2 O3 C1 O1 0.7(4) no . . . .
C2 O3 C1 O2 -178.5(4) no . . . .
C6 N1 C7 C8 0.0(4) no . . . .
C7 N1 C6 Au1 174.5(3) no . . . .
C7 N1 C6 N2 -0.3(4) no . . . .
C6 N1 C9 C10 83.9(4) no . . . .
C6 N1 C9 C14 -91.3(4) no . . . .
C9 N1 C6 Au1 -10.0(5) no . . . .
C9 N1 C6 N2 175.1(3) no . . . .
C7 N1 C9 C10 -101.4(4) no . . . .
C7 N1 C9 C14 83.4(4) no . . . .
C9 N1 C7 C8 -175.1(3) no . . . .
C6 N2 C8 C7 -0.5(4) no . . . .
C8 N2 C6 Au1 -174.4(3) no . . . .
C8 N2 C6 N1 0.5(4) no . . . .
C6 N2 C21 C22 80.9(4) no . . . .
C6 N2 C21 C26 -96.5(4) no . . . .
C21 N2 C6 Au1 6.2(5) no . . . .
C21 N2 C6 N1 -178.9(3) no . . . .
C8 N2 C21 C22 -98.3(4) no . . . .
C8 N2 C21 C26 84.3(4) no . . . .
C21 N2 C8 C7 178.8(3) no . . . .
O3 C2 C3 O1 3.0(3) no . . . .
O3 C2 C3 C4 -180.0(3) no . . . .
O1 C3 C4 Au1 179.3(3) no . . . .
O1 C3 C4 C5 1.5(5) no . . . .
C2 C3 C4 Au1 2.8(5) no . . . .
C2 C3 C4 C5 -175.0(3) no . . . .
N1 C7 C8 N2 0.3(4) no . . . .
N1 C9 C10 C11 -174.0(3) no . . . .
N1 C9 C10 C15 5.5(5) no . . . .
N1 C9 C14 C13 174.4(3) no . . . .
N1 C9 C14 C18 -1.8(5) no . . . .
C10 C9 C14 C13 -0.6(5) no . . . .
C10 C9 C14 C18 -176.8(3) no . . . .
C14 C9 C10 C11 0.9(5) no . . . .
C14 C9 C10 C15 -179.6(3) no . . . .
C9 C10 C11 C12 -0.0(6) no . . . .
C9 C10 C15 C16 -119.3(4) no . . . .
C9 C10 C15 C17 116.6(4) no . . . .
C11 C10 C15 C16 60.2(4) no . . . .
C11 C10 C15 C17 -63.9(4) no . . . .
C15 C10 C11 C12 -179.5(3) no . . . .
C10 C11 C12 C13 -1.2(6) no . . . .
C11 C12 C13 C14 1.5(6) no . . . .
C12 C13 C14 C9 -0.6(6) no . . . .
C12 C13 C14 C18 175.6(4) no . . . .
C9 C14 C18 C19 104.3(4) no . . . .
C9 C14 C18 C20 -131.6(3) no . . . .
C13 C14 C18 C19 -71.8(4) no . . . .
C13 C14 C18 C20 52.3(5) no . . . .
N2 C21 C22 C23 -177.6(3) no . . . .
N2 C21 C22 C27 3.4(4) no . . . .
N2 C21 C26 C25 177.9(3) no . . . .
N2 C21 C26 C30 0.7(5) no . . . .
C22 C21 C26 C25 0.6(5) no . . . .
C22 C21 C26 C30 -176.6(3) no . . . .
C26 C21 C22 C23 -0.2(5) no . . . .
C26 C21 C22 C27 -179.3(3) no . . . .
C21 C22 C23 C24 -0.2(5) no . . . .
C21 C22 C27 C28 89.2(4) no . . . .
C21 C22 C27 C29 -147.3(3) no . . . .
C23 C22 C27 C28 -89.8(4) no . . . .
C23 C22 C27 C29 33.7(4) no . . . .
C27 C22 C23 C24 178.9(3) no . . . .
C22 C23 C24 C25 0.2(5) no . . . .
C23 C24 C25 C26 0.2(5) no . . . .
C24 C25 C26 C21 -0.6(5) no . . . .
C24 C25 C26 C30 176.6(3) no . . . .
C21 C26 C30 C31 -122.6(4) no . . . .
C21 C26 C30 C32 109.3(4) no . . . .
C25 C26 C30 C31 60.2(4) no . . . .
C25 C26 C30 C32 -67.8(4) no . . . .

loop_
_geom_contact_atom_site_label_1
_geom_contact_atom_site_label_2
_geom_contact_distance
_geom_contact_publ_flag
_geom_contact_site_symmetry_1
_geom_contact_site_symmetry_2
Au1 C2 3.305(4) no . .
Au1 C9 3.385(4) no . .
Au1 C21 3.354(4) no . .
O1 C5 2.917(4) no . .
O2 C2 3.425(5) no . .
O2 C3 3.416(5) no . .
N1 C15 2.920(5) no . .
N1 C18 2.884(4) no . .
N1 C21 3.538(5) no . .
N2 C9 3.527(4) no . .
N2 C27 2.879(5) no . .
N2 C28 3.519(7) no . .
N2 C30 2.898(5) no . .
C1 C4 3.517(5) no . .
C6 C10 3.235(5) no . .
C6 C14 3.281(5) no . .
C6 C15 3.462(5) no . .
C6 C18 3.502(5) no . .
C6 C22 3.213(5) no . .
C6 C26 3.343(5) no . .
C6 C27 3.360(5) no . .
C6 C30 3.582(5) no . .
C7 C10 3.465(5) no . .
C7 C14 3.329(5) no . .
C7 C18 3.432(5) no . .
C8 C9 3.592(5) no . .
C8 C22 3.429(5) no . .
C8 C26 3.345(5) no . .
C8 C30 3.478(5) no . .
C9 C12 2.746(5) no . .
C9 C17 3.581(5) no . .
C9 C19 3.479(5) no . .
C10 C13 2.797(5) no . .
C11 C14 2.794(5) no . .
C11 C16 3.086(5) no . .
C11 C17 3.087(6) no . .
C13 C19 3.164(6) no . .
C13 C20 3.037(6) no . .
C21 C24 2.739(5) no . .
C21 C28 3.355(6) no . .
C21 C32 3.507(7) no . .
C22 C25 2.804(5) no . .
C23 C26 2.795(5) no . .
C23 C28 3.346(7) no . .
C23 C29 2.922(7) no . .
C25 C31 3.091(6) no . .
C25 C32 3.119(7) no . .
O1 C23 3.138(5) no . 2_555
O1 C24 3.495(5) no . 2_555
O1 C31 3.587(6) no . 6_555
O2 C7 3.262(5) no . 3_554
O3 C31 3.594(6) no . 6_555
C1 C31 3.590(7) no . 6_555
C3 C31 3.560(6) no . 6_555
C7 O2 3.262(5) no . 3_555
C23 O1 3.138(5) no . 2_545
C24 O1 3.495(5) no . 2_545
C31 O1 3.587(6) no . 6_455
C31 O3 3.594(6) no . 6_455
C31 C1 3.590(7) no . 6_455
C31 C3 3.560(6) no . 6_455
Au1 H1 3.2909 no . .
Au1 H2 3.2471 no . .
Au1 H3 3.2188 no . .
Au1 H4 3.2864 no . .
Au1 H14 2.9635 no . .
Au1 H19 3.2804 no . .
Au1 H28 3.4279 no . .
Au1 H41 3.2048 no . .
O1 H1 2.9671 no . .
O1 H2 3.0019 no . .
O1 H3 3.5801 no . .
O1 H4 3.5356 no . .
O1 H5 2.4614 no . .
N1 H7 3.0923 no . .
N1 H11 2.4287 no . .
N1 H18 2.4109 no . .
N1 H19 3.4071 no . .
N1 H28 3.3795 no . .
N1 H35 3.5565 no . .
N2 H6 3.1059 no . .
N2 H11 3.5584 no . .
N2 H18 3.4651 no . .
N2 H28 2.4762 no . .
N2 H31 3.0768 no . .
N2 H35 2.3888 no . .
N2 H41 3.5705 no . .
C1 H1 2.9029 no . .
C1 H2 2.9282 no . .
C3 H3 3.0906 no . .
C3 H4 3.0786 no . .
C3 H5 2.5378 no . .
C4 H1 2.9186 no . .
C4 H2 2.9155 no . .
C4 H14 3.5358 no . .
C5 H14 3.4446 no . .
C6 H6 3.1539 no . .
C6 H7 3.1374 no . .
C6 H11 2.8604 no . .
C6 H14 3.5857 no . .
C6 H18 2.9940 no . .
C6 H19 3.2085 no . .
C6 H28 2.6405 no . .
C6 H35 2.9867 no . .
C6 H41 3.5077 no . .
C7 H11 3.0362 no . .
C7 H18 2.6887 no . .
C7 H35 3.4704 no . .
C8 H18 3.3306 no . .
C8 H28 3.2177 no . .
C8 H31 2.9826 no . .
C8 H35 2.7644 no . .
C9 H6 2.8552 no . .
C9 H8 3.2166 no . .
C9 H10 3.2293 no . .
C9 H11 2.5925 no . .
C9 H14 3.5626 no . .
C9 H17 3.4636 no . .
C9 H18 2.5957 no . .
C9 H19 3.3222 no . .
C10 H9 3.2507 no . .
C10 H12 3.3527 no . .
C10 H13 2.6955 no . .
C10 H14 2.7376 no . .
C10 H15 2.7196 no . .
C10 H16 3.3335 no . .
C10 H17 2.6585 no . .
C11 H10 3.2309 no . .
C11 H11 3.3023 no . .
C11 H13 2.7856 no . .
C11 H14 3.3736 no . .
C11 H15 2.8390 no . .
C11 H17 3.3007 no . .
C13 H8 3.2274 no . .
C13 H18 3.3110 no . .
C13 H19 3.4593 no . .
C13 H20 2.8785 no . .
C13 H22 3.2511 no . .
C13 H24 2.7586 no . .
C14 H6 3.5130 no . .
C14 H9 3.2536 no . .
C14 H19 2.6812 no . .
C14 H20 2.6675 no . .
C14 H21 3.3310 no . .
C14 H22 2.7143 no . .
C14 H23 3.3443 no . .
C14 H24 2.7135 no . .
C15 H8 2.6551 no . .
C16 H3 3.4891 no . .
C16 H8 2.9251 no . .
C16 H15 2.7015 no . .
C16 H16 2.7063 no . .
C16 H17 3.3475 no . .
C17 H8 2.9454 no . .
C17 H12 2.6636 no . .
C17 H13 2.7486 no . .
C17 H14 3.3445 no . .
C18 H10 2.6744 no . .
C18 H28 3.5096 no . .
C19 H10 3.1140 no . .
C19 H22 3.3524 no . .
C19 H23 2.6879 no . .
C19 H24 2.7254 no . .
C19 H28 3.1694 no . .
C20 H10 2.8054 no . .
C20 H19 3.3465 no . .
C20 H20 2.7424 no . .
C20 H21 2.6840 no . .
C21 H7 2.8330 no . .
C21 H25 3.2298 no . .
C21 H27 3.2247 no . .
C21 H28 2.6222 no . .
C21 H31 3.1309 no . .
C21 H35 2.5637 no . .
C21 H36 3.5369 no . .
C21 H41 3.3660 no . .
C22 H2 3.5727 no . .
C22 H26 3.2518 no . .
C22 H29 2.6939 no . .
C22 H30 3.3277 no . .
C22 H31 2.6728 no . .
C22 H32 2.7288 no . .
C22 H33 2.6796 no . .
C22 H34 3.3388 no . .
C23 H1 3.5987 no . .
C23 H2 3.4476 no . .
C23 H27 3.2342 no . .
C23 H28 3.2690 no . .
C23 H29 3.1463 no . .
C23 H32 2.7108 no . .
C23 H33 2.9757 no . .
C24 H1 3.4454 no . .
C25 H1 3.5193 no . .
C25 H25 3.2326 no . .
C25 H35 3.3026 no . .
C25 H36 3.2482 no . .
C25 H38 2.8797 no . .
C25 H39 2.8349 no . .
C25 H41 3.3922 no . .
C26 H7 3.4873 no . .
C26 H26 3.2382 no . .
C26 H36 2.6524 no . .
C26 H37 3.3354 no . .
C26 H38 2.7541 no . .
C26 H39 2.6728 no . .
C26 H40 3.3295 no . .
C26 H41 2.6721 no . .
C27 H19 3.5015 no . .
C27 H25 2.6840 no . .
C28 H25 3.3883 no . .
C28 H32 2.6236 no . .
C28 H33 3.2885 no . .
C28 H34 2.6372 no . .
C29 H25 2.6191 no . .
C29 H29 2.6806 no . .
C29 H30 2.6053 no . .
C29 H31 3.2773 no . .
C30 H27 2.6711 no . .
C31 H27 2.9162 no . .
C31 H39 2.8083 no . .
C31 H40 2.7255 no . .
C31 H41 3.3671 no . .
C32 H27 3.0382 no . .
C32 H36 3.3806 no . .
C32 H37 2.7805 no . .
C32 H38 2.7239 no . .
H1 H41 3.4589 no . .
H2 H25 3.5641 no . .
H2 H33 2.7578 no . .
H3 H13 3.4224 no . .
H3 H14 2.7273 no . .
H6 H7 2.4605 no . .
H6 H11 3.4155 no . .
H6 H18 2.9566 no . .
H7 H31 2.8681 no . .
H7 H35 3.0228 no . .
H7 H36 3.5030 no . .
H8 H9 2.3034 no . .
H8 H11 3.5763 no . .
H8 H13 2.3822 no . .
H8 H14 3.3810 no . .
H8 H15 2.4434 no . .
H8 H17 3.3332 no . .
H9 H10 2.3037 no . .
H10 H18 3.5854 no . .
H10 H20 2.6253 no . .
H10 H22 3.1484 no . .
H10 H24 2.2576 no . .
H11 H12 2.3642 no . .
H11 H13 2.8254 no . .
H11 H14 2.3173 no . .
H11 H15 2.8264 no . .
H11 H16 2.3280 no . .
H11 H17 2.3534 no . .
H11 H35 3.2342 no . .
H12 H15 2.9127 no . .
H12 H16 2.4951 no . .
H12 H17 3.5482 no . .
H13 H15 2.5811 no . .
H13 H16 3.0478 no . .
H14 H15 3.5920 no . .
H14 H16 3.5542 no . .
H14 H41 3.3036 no . .
H18 H19 2.3250 no . .
H18 H20 2.8270 no . .
H18 H21 2.3680 no . .
H18 H22 2.3372 no . .
H18 H23 2.3402 no . .
H18 H24 2.8247 no . .
H18 H28 2.8983 no . .
H19 H23 3.5452 no . .
H19 H28 2.6281 no . .
H19 H33 3.5335 no . .
H19 H34 3.3968 no . .
H20 H23 3.0071 no . .
H20 H24 2.5946 no . .
H21 H22 3.5577 no . .
H21 H23 2.4916 no . .
H21 H24 2.9659 no . .
H21 H28 3.0920 no . .
H21 H34 3.2089 no . .
H25 H26 2.3021 no . .
H25 H28 3.5332 no . .
H25 H29 3.0338 no . .
H25 H32 2.1415 no . .
H25 H33 2.7302 no . .
H25 H34 3.5319 no . .
H26 H27 2.2969 no . .
H27 H35 3.5850 no . .
H27 H36 3.2184 no . .
H27 H38 2.4332 no . .
H27 H39 2.5322 no . .
H27 H41 3.5041 no . .
H28 H29 2.8153 no . .
H28 H30 2.3333 no . .
H28 H31 2.2977 no . .
H28 H32 2.7973 no . .
H28 H33 2.3312 no . .
H28 H34 2.3018 no . .
H29 H32 2.4922 no . .
H29 H33 3.5494 no . .
H29 H34 2.9730 no . .
H30 H32 2.8557 no . .
H30 H33 3.4930 no . .
H30 H34 2.4256 no . .
H31 H32 3.5110 no . .
H31 H34 3.4908 no . .
H35 H36 2.3384 no . .
H35 H37 2.2754 no . .
H35 H38 2.7924 no . .
H35 H39 2.8254 no . .
H35 H40 2.3630 no . .
H35 H41 2.3092 no . .
H37 H39 3.1464 no . .
H37 H40 2.6008 no . .
H38 H39 2.6294 no . .
H38 H40 2.9397 no . .
Au1 H27 3.4035 no . 6_555
O1 H4 3.3046 no . 5_665
O1 H25 2.8545 no . 2_555
O1 H26 3.4750 no . 2_555
O1 H29 3.1272 no . 2_555
O1 H36 3.1410 no . 6_555
O1 H38 3.1759 no . 6_555
O2 H6 2.3451 no . 3_554
O2 H12 3.1950 no . 4_564
O2 H15 3.5602 no . 4_564
O2 H16 3.2132 no . 4_564
O2 H24 3.3213 no . 6_455
O2 H25 3.1800 no . 2_555
O3 H6 3.1041 no . 3_554
O3 H17 2.8117 no . 3_554
O3 H20 2.9721 no . 6_455
O3 H24 3.0941 no . 6_455
O3 H36 3.5844 no . 6_555
O3 H37 3.5019 no . 6_555
O3 H38 3.1293 no . 6_555
C1 H6 3.0094 no . 3_554
C1 H24 3.5048 no . 6_455
C1 H25 3.1955 no . 2_555
C1 H36 3.2222 no . 6_555
C1 H38 3.3135 no . 6_555
C2 H17 3.1483 no . 3_554
C2 H20 3.1583 no . 6_455
C2 H29 3.3230 no . 2_555
C2 H38 2.8365 no . 6_555
C3 H27 3.5254 no . 6_555
C3 H29 2.8609 no . 2_555
C3 H36 3.4553 no . 6_555
C3 H38 2.8225 no . 6_555
C4 H27 3.1153 no . 6_555
C4 H29 3.0809 no . 2_555
C4 H31 3.5047 no . 2_555
C4 H38 3.4049 no . 6_555
C5 H4 3.3691 no . 5_665
C5 H5 3.1148 no . 5_665
C5 H26 3.5947 no . 6_555
C5 H27 3.5767 no . 6_555
C5 H29 3.5608 no . 2_555
C5 H31 3.5729 no . 2_555
C7 H12 3.5516 no . 2_545
C7 H24 3.4538 no . 8_455
C8 H3 3.5697 no . 2_545
C8 H12 3.3034 no . 2_545
C8 H13 3.3749 no . 2_545
C8 H14 3.5882 no . 2_545
C8 H24 3.5252 no . 8_455
C9 H37 3.2240 no . 8_555
C10 H37 3.1841 no . 8_555
C11 H37 3.0681 no . 8_555
C11 H40 3.0961 no . 8_555
C12 H11 3.5269 no . 8_555
C12 H12 3.5868 no . 8_555
C12 H16 3.2085 no . 8_555
C12 H35 3.3811 no . 8_555
C12 H37 3.0297 no . 8_555
C12 H40 2.8929 no . 8_555
C13 H11 3.5229 no . 8_555
C13 H16 3.2667 no . 8_555
C13 H35 3.3596 no . 8_555
C13 H37 3.0738 no . 8_555
C14 H37 3.1953 no . 8_555
C15 H9 3.3618 no . 8_455
C15 H10 3.5568 no . 8_455
C16 H7 2.8429 no . 2_555
C16 H9 3.3622 no . 8_455
C17 H2 3.4843 no . 3_555
C17 H9 3.4038 no . 8_455
C17 H10 3.2786 no . 8_455
C17 H25 2.9988 no . 3_555
C17 H32 3.5069 no . 3_555
C19 H1 3.2356 no . 6_555
C19 H27 3.4696 no . 6_555
C20 H8 3.3491 no . 7_645
C20 H13 3.1435 no . 7_645
C21 H3 3.3464 no . 2_545
C21 H5 3.4339 no . 2_545
C22 H3 3.5339 no . 2_545
C22 H5 3.3300 no . 2_545
C23 H5 3.0892 no . 2_545
C23 H15 3.4838 no . 3_554
C23 H16 3.2952 no . 3_554
C24 H4 3.0273 no . 6_455
C24 H5 2.9898 no . 2_545
C24 H16 3.5028 no . 3_554
C24 H20 3.3838 no . 6_455
C25 H4 3.2420 no . 6_455
C25 H5 3.1363 no . 2_545
C25 H19 3.3677 no . 6_455
C25 H20 3.4798 no . 6_455
C26 H3 3.5800 no . 2_545
C26 H5 3.3772 no . 2_545
C28 H3 3.5940 no . 2_545
C28 H21 3.5183 no . 5_655
C28 H34 3.4939 no . 5_655
C28 H39 3.4872 no . 2_545
C28 H41 3.1351 no . 2_545
C29 H15 3.2933 no . 3_554
C29 H21 3.4565 no . 5_655
C29 H30 3.4875 no . 5_655
C29 H39 3.1382 no . 6_555
C31 H2 3.1922 no . 6_455
C32 H9 3.4173 no . 8_455
C32 H30 3.0983 no . 2_555
C32 H31 3.5476 no . 2_555
C32 H33 3.3433 no . 6_455
C32 H34 3.4509 no . 6_455
H1 C19 3.2356 no . 6_455
H1 H17 3.4825 no . 3_554
H1 H20 2.4997 no . 6_455
H1 H21 3.1759 no . 6_455
H1 H29 2.9550 no . 2_555
H2 C17 3.4843 no . 3_554
H2 C31 3.1922 no . 6_555
H2 H17 2.6548 no . 3_554
H2 H36 3.5958 no . 6_555
H2 H37 3.3053 no . 6_555
H2 H38 2.3512 no . 6_555
H3 C8 3.5697 no . 2_555
H3 C21 3.3464 no . 2_555
H3 C22 3.5339 no . 2_555
H3 C26 3.5800 no . 2_555
H3 C28 3.5940 no . 2_555
H3 H7 2.8749 no . 2_555
H3 H29 3.3931 no . 2_555
H3 H31 2.9997 no . 2_555
H3 H36 3.3595 no . 2_555
H4 O1 3.3046 no . 5_665
H4 C5 3.3691 no . 5_665
H4 C24 3.0273 no . 6_555
H4 C25 3.2420 no . 6_555
H4 H4 3.3110 no . 5_665
H4 H5 2.6186 no . 5_665
H4 H26 2.6972 no . 6_555
H4 H27 3.0854 no . 6_555
H5 C5 3.1148 no . 5_665
H5 C21 3.4339 no . 2_555
H5 C22 3.3300 no . 2_555
H5 C23 3.0892 no . 2_555
H5 C24 2.9898 no . 2_555
H5 C25 3.1363 no . 2_555
H5 C26 3.3772 no . 2_555
H5 H4 2.6186 no . 5_665
H5 H5 2.7686 no . 5_665
H5 H25 3.5228 no . 2_555
H5 H26 3.3725 no . 2_555
H5 H27 3.5828 no . 2_555
H5 H29 3.5250 no . 2_555
H6 O2 2.3451 no . 3_555
H6 O3 3.1041 no . 3_555
H6 C1 3.0094 no . 3_555
H6 H12 3.2397 no . 2_545
H6 H24 3.1465 no . 8_455
H7 C16 2.8429 no . 2_545
H7 H3 2.8749 no . 2_545
H7 H12 2.7177 no . 2_545
H7 H13 2.5501 no . 2_545
H7 H14 2.7768 no . 2_545
H7 H22 3.3285 no . 8_455
H7 H24 3.2718 no . 8_455
H8 C20 3.3491 no . 7_655
H8 H22 3.0273 no . 7_655
H8 H23 2.7845 no . 7_655
H8 H37 3.5450 no . 8_555
H8 H40 2.9880 no . 8_555
H9 C15 3.3618 no . 8_555
H9 C16 3.3622 no . 8_555
H9 C17 3.4038 no . 8_555
H9 C32 3.4173 no . 8_555
H9 H11 2.9143 no . 8_555
H9 H12 2.6636 no . 8_555
H9 H16 2.6836 no . 8_555
H9 H35 3.3295 no . 8_555
H9 H37 3.5106 no . 8_555
H9 H40 2.6579 no . 8_555
H9 H41 3.5823 no . 8_555
H10 C15 3.5568 no . 8_555
H10 C17 3.2786 no . 8_555
H10 H11 2.8984 no . 8_555
H10 H16 2.8170 no . 8_555
H10 H17 3.1262 no . 8_555
H10 H35 3.2615 no . 8_555
H10 H37 3.5477 no . 8_555
H11 C12 3.5269 no . 8_455
H11 C13 3.5229 no . 8_455
H11 H9 2.9143 no . 8_455
H11 H10 2.8984 no . 8_455
H12 O2 3.1950 no . 4_565
H12 C7 3.5516 no . 2_555
H12 C8 3.3034 no . 2_555
H12 C12 3.5868 no . 8_455
H12 H6 3.2397 no . 2_555
H12 H7 2.7177 no . 2_555
H12 H9 2.6636 no . 8_455
H12 H31 3.5809 no . 2_555
H13 C8 3.3749 no . 2_555
H13 C20 3.1435 no . 7_655
H13 H7 2.5501 no . 2_555
H13 H22 2.8139 no . 7_655
H13 H23 2.8974 no . 7_655
H13 H24 3.2004 no . 7_655
H14 C8 3.5882 no . 2_555
H14 H7 2.7768 no . 2_555
H14 H31 3.1820 no . 2_555
H15 O2 3.5602 no . 4_565
H15 C23 3.4838 no . 3_555
H15 C29 3.2933 no . 3_555
H15 H23 3.0032 no . 7_655
H15 H25 2.6960 no . 3_555
H15 H32 2.6996 no . 3_555
H15 H33 3.0119 no . 3_555
H16 O2 3.2132 no . 4_565
H16 C12 3.2085 no . 8_455
H16 C13 3.2667 no . 8_455
H16 C23 3.2952 no . 3_555
H16 C24 3.5028 no . 3_555
H16 H9 2.6836 no . 8_455
H16 H10 2.8170 no . 8_455
H16 H25 2.6610 no . 3_555
H16 H26 3.0747 no . 3_555
H17 O3 2.8117 no . 3_555
H17 C2 3.1483 no . 3_555
H17 H1 3.4825 no . 3_555
H17 H2 2.6548 no . 3_555
H17 H10 3.1262 no . 8_455
H17 H25 3.1594 no . 3_555
H17 H33 3.3924 no . 3_555
H17 H37 3.2830 no . 8_555
H17 H38 3.5653 no . 8_555
H19 C25 3.3677 no . 6_555
H19 H26 3.4175 no . 6_555
H19 H27 2.7986 no . 6_555
H19 H39 3.2956 no . 6_555
H20 O3 2.9721 no . 6_555
H20 C2 3.1583 no . 6_555
H20 C24 3.3838 no . 6_555
H20 C25 3.4798 no . 6_555
H20 H1 2.4997 no . 6_555
H20 H26 3.1320 no . 6_555
H20 H27 3.3137 no . 6_555
H21 C28 3.5183 no . 5_655
H21 C29 3.4565 no . 5_655
H21 H1 3.1759 no . 6_555
H21 H29 3.1131 no . 5_655
H21 H30 3.1180 no . 5_655
H21 H32 2.9659 no . 5_655
H21 H34 3.1161 no . 5_655
H21 H39 3.4900 no . 6_555
H22 H7 3.3285 no . 8_555
H22 H8 3.0273 no . 7_645
H22 H13 2.8139 no . 7_645
H22 H36 3.2998 no . 8_555
H22 H37 3.5771 no . 8_555
H23 H8 2.7845 no . 7_645
H23 H13 2.8974 no . 7_645
H23 H15 3.0032 no . 7_645
H23 H32 2.9775 no . 5_655
H24 O2 3.3213 no . 6_555
H24 O3 3.0941 no . 6_555
H24 C1 3.5048 no . 6_555
H24 C7 3.4538 no . 8_555
H24 C8 3.5252 no . 8_555
H24 H6 3.1465 no . 8_555
H24 H7 3.2718 no . 8_555
H24 H13 3.2004 no . 7_645
H25 O1 2.8545 no . 2_545
H25 O2 3.1800 no . 2_545
H25 C1 3.1955 no . 2_545
H25 C17 2.9988 no . 3_554
H25 H5 3.5228 no . 2_545
H25 H15 2.6960 no . 3_554
H25 H16 2.6610 no . 3_554
H25 H17 3.1594 no . 3_554
H26 O1 3.4750 no . 2_545
H26 C5 3.5947 no . 6_455
H26 H4 2.6972 no . 6_455
H26 H5 3.3725 no . 2_545
H26 H16 3.0747 no . 3_554
H26 H19 3.4175 no . 6_455
H26 H20 3.1320 no . 6_455
H27 Au1 3.4035 no . 6_455
H27 C3 3.5254 no . 6_455
H27 C4 3.1153 no . 6_455
H27 C5 3.5767 no . 6_455
H27 C19 3.4696 no . 6_455
H27 H4 3.0854 no . 6_455
H27 H5 3.5828 no . 2_545
H27 H19 2.7986 no . 6_455
H27 H20 3.3137 no . 6_455
H29 O1 3.1272 no . 2_545
H29 C2 3.3230 no . 2_545
H29 C3 2.8609 no . 2_545
H29 C4 3.0809 no . 2_545
H29 C5 3.5608 no . 2_545
H29 H1 2.9550 no . 2_545
H29 H3 3.3931 no . 2_545
H29 H5 3.5250 no . 2_545
H29 H21 3.1131 no . 5_655
H29 H39 3.5305 no . 2_545
H29 H41 3.1255 no . 2_545
H30 C29 3.4875 no . 5_655
H30 C32 3.0983 no . 2_545
H30 H21 3.1180 no . 5_655
H30 H34 2.5513 no . 5_655
H30 H39 2.7994 no . 2_545
H30 H40 3.1564 no . 2_545
H30 H41 2.8262 no . 2_545
H31 C4 3.5047 no . 2_545
H31 C5 3.5729 no . 2_545
H31 C32 3.5476 no . 2_545
H31 H3 2.9997 no . 2_545
H31 H12 3.5809 no . 2_545
H31 H14 3.1820 no . 2_545
H31 H40 3.5486 no . 2_545
H31 H41 2.9278 no . 2_545
H32 C17 3.5069 no . 3_554
H32 H15 2.6996 no . 3_554
H32 H21 2.9659 no . 5_655
H32 H23 2.9775 no . 5_655
H33 C32 3.3433 no . 6_555
H33 H15 3.0119 no . 3_554
H33 H17 3.3924 no . 3_554
H33 H38 3.2108 no . 6_555
H33 H39 2.6551 no . 6_555
H33 H40 3.2107 no . 6_555
H34 C28 3.4939 no . 5_655
H34 C32 3.4509 no . 6_555
H34 H21 3.1161 no . 5_655
H34 H30 2.5513 no . 5_655
H34 H34 3.0430 no . 5_655
H34 H39 2.7466 no . 6_555
H34 H40 3.3333 no . 6_555
H35 C12 3.3811 no . 8_455
H35 C13 3.3596 no . 8_455
H35 H9 3.3295 no . 8_455
H35 H10 3.2615 no . 8_455
H36 O1 3.1410 no . 6_455
H36 O3 3.5844 no . 6_455
H36 C1 3.2222 no . 6_455
H36 C3 3.4553 no . 6_455
H36 H2 3.5958 no . 6_455
H36 H3 3.3595 no . 2_545
H36 H22 3.2998 no . 8_455
H37 O3 3.5019 no . 6_455
H37 C9 3.2240 no . 8_455
H37 C10 3.1841 no . 8_455
H37 C11 3.0681 no . 8_455
H37 C12 3.0297 no . 8_455
H37 C13 3.0738 no . 8_455
H37 C14 3.1953 no . 8_455
H37 H2 3.3053 no . 6_455
H37 H8 3.5450 no . 8_455
H37 H9 3.5106 no . 8_455
H37 H10 3.5477 no . 8_455
H37 H17 3.2830 no . 8_455
H37 H22 3.5771 no . 8_455
H38 O1 3.1759 no . 6_455
H38 O3 3.1293 no . 6_455
H38 C1 3.3135 no . 6_455
H38 C2 2.8365 no . 6_455
H38 C3 2.8225 no . 6_455
H38 C4 3.4049 no . 6_455
H38 H2 2.3512 no . 6_455
H38 H17 3.5653 no . 8_455
H38 H33 3.2108 no . 6_455
H39 C28 3.4872 no . 2_555
H39 C29 3.1382 no . 6_455
H39 H19 3.2956 no . 6_455
H39 H21 3.4900 no . 6_455
H39 H29 3.5305 no . 2_555
H39 H30 2.7994 no . 2_555
H39 H33 2.6551 no . 6_455
H39 H34 2.7466 no . 6_455
H40 C11 3.0961 no . 8_455
H40 C12 2.8929 no . 8_455
H40 H8 2.9880 no . 8_455
H40 H9 2.6579 no . 8_455
H40 H30 3.1564 no . 2_555
H40 H31 3.5486 no . 2_555
H40 H33 3.2107 no . 6_455
H40 H34 3.3333 no . 6_455
H41 C28 3.1351 no . 2_555
H41 H9 3.5823 no . 8_455
H41 H29 3.1255 no . 2_555
H41 H30 2.8262 no . 2_555
H41 H31 2.9278 no . 2_555

#==============================================================================

#==============================================================================
# Additional structures and associated data_? identifiers
# should be added at this point if there is more than one 
# structure analysis in the CIF.

#==============================================================================
#     End of CIF
#==============================================================================
