# Supplementary material for: Synthesis of Alkenylgold(I) Complexes Relevant to Catalytic Carboxylative Cyclization of Unsaturated Amines and Alcohols
Source: Molecules. 2024 Mar 16;29(6):1331. doi: 10.3390/molecules29061331 (PMC10975222; doi:10.3390/molecules29061331)
Supplement: Supplementary file 1 [file molecules-29-01331-s001.zip › CIF11.cif]

data_General
_audit_creation_date                    2014-04-03
_audit_creation_method                 'by CrystalStructure 4.0'
_audit_update_record                    ?

#==============================================================================
# PROCESSING SUMMARY (IUCr Office Use Only)

_journal_date_recd_electronic           ?
_journal_date_from_coeditor             ?
_journal_date_accepted                  ?
_journal_coeditor_code                  ?

#==============================================================================
# SUBMISSION DETAILS

_publ_contact_author_name              'ENTER NAME'
_publ_contact_author_email             'ENTER EMAIL ADDRESS'
_publ_contact_author_fax               'ENTER FAX NUMBER'
_publ_contact_author_phone             'ENTER PHONE NUMBER'
_publ_contact_letter
;
    ENTER TEXT OF LETTER
;
_publ_requested_journal                'ENTER JOURNAL NAME HERE'
_publ_requested_category               'CHOOSE FI FM FO CI CM CO or AD'
_publ_requested_coeditor_name           ?

#==============================================================================
# TITLE AND AUTHOR LIST

_publ_section_title
;
    ENTER SECTION TITLE
;
_publ_section_title_footnote
;
    ENTER FOOTNOTE TO TITLE OF PAPER
;
loop_
_publ_author_name
_publ_author_footnote
_publ_author_address
' FIRST AUTHORS NAME '
;
  FIRST AUTHORS FOOTNOTES
;
;
  FIRST AUTHORS ADDRESS
;
_publ_section_synopsis
;
    ENTER SYNOPSIS
;

#==============================================================================
# TEXT

_publ_section_abstract
;
    ENTER ABSTRACT
;
_publ_section_comment
;
    ENTER TEXT
;
_publ_section_references
;
    ENTER OTHER REFERENCES

    Rigaku (2010). CrystalStructure. Version 4.0. 
    Rigaku Corporation, Tokyo, Japan.

    Burla, M.C., Camalli, M., Carrozzini, B., Cascarano, G.L., 
    Giacovazzo, C., Polidori, G., Spagna., R. 
    (2003). 
    SIR2002

    Carruthers, J.R., Rollett,J.S., Betteridge, P.W.,
	 Kinna, D., Pearce, L., Larsen, A., and Gabe, E.(1999)
    CRYSTALS Issue 11, Chemical Crystallography Laboratory, Oxford, UK.

    Rigaku (1998). REQAB. 
    Rigaku Corporation, Tokyo, Japan.

;
_publ_section_figure_captions
;
    ENTER FIGURE CAPTIONS
;
_publ_section_exptl_prep
;
    ENTER COMPOUND PREPARATION DETAILS
;
_publ_section_exptl_refinement
;
    ENTER SPECIAL DETAILS OF THE REFINEMENT
;

#==============================================================================
data_vinyl-AuIPr-carbonate-v7

#==============================================================================
# CHEMICAL DATA

_chemical_formula_sum                  'C32 H41 Au N2 O3'
_chemical_formula_moiety               'C32 H41 Au N2 O3'
_chemical_formula_weight                698.65
_chemical_melting_point                 ?

#==============================================================================
# CRYSTAL DATA
_symmetry_cell_setting                  monoclinic
_symmetry_space_group_name_H-M         'P 1 21/n 1'
_symmetry_space_group_name_Hall        '-P 2yn'
_symmetry_Int_Tables_number             14
loop_
_symmetry_equiv_pos_site_id
_symmetry_equiv_pos_as_xyz
1   '+X,+Y,+Z'
2   '1/2-X,1/2+Y,1/2-Z'
3   '-X,-Y,-Z'
4   '1/2+X,1/2-Y,1/2+Z'
#------------------------------------------------------------------------------
_cell_length_a                          10.153(3)
_cell_length_b                          16.657(4)
_cell_length_c                          18.566(5)
_cell_angle_alpha                       90.0000
_cell_angle_beta                        95.620(4)
_cell_angle_gamma                       90.0000
_cell_volume                            3125.0(13)
_cell_formula_units_Z                   4
_cell_measurement_reflns_used           7030
_cell_measurement_theta_min             3.09
_cell_measurement_theta_max             27.49
_cell_measurement_temperature           93
#------------------------------------------------------------------------------
_exptl_crystal_description              prism
_exptl_crystal_colour                   colorless
_exptl_crystal_size_max                 0.087
_exptl_crystal_size_mid                 0.076
_exptl_crystal_size_min                 0.052
_exptl_crystal_density_diffrn           1.485
_exptl_crystal_density_meas             ?
_exptl_crystal_density_method          'not measured'
_exptl_crystal_F_000                    1400.00
_exptl_absorpt_coefficient_mu           4.756
_exptl_absorpt_correction_type          multi-scan
_exptl_absorpt_process_details         'REQAB (Rigaku, 1998)'
_exptl_absorpt_correction_T_min         0.622
_exptl_absorpt_correction_T_max         0.781

#==============================================================================
# EXPERIMENTAL DATA

_diffrn_ambient_temperature             93
_diffrn_radiation_type                 'Mo K\a'
_diffrn_radiation_wavelength            0.71075
_diffrn_measurement_device_type        'Rigaku Saturn724'
_diffrn_measurement_method              \w
_diffrn_detector_area_resol_mean        7.111
_diffrn_reflns_number                   25391
_diffrn_reflns_av_R_equivalents         0.0472
_diffrn_reflns_theta_max                27.47
_diffrn_reflns_theta_full               27.47
_diffrn_measured_fraction_theta_max     0.982
_diffrn_measured_fraction_theta_full    0.982
_diffrn_reflns_limit_h_min             -10
_diffrn_reflns_limit_h_max              13
_diffrn_reflns_limit_k_min             -21
_diffrn_reflns_limit_k_max              21
_diffrn_reflns_limit_l_min             -18
_diffrn_reflns_limit_l_max              24
_diffrn_standards_number                0
_diffrn_standards_interval_count        .
_diffrn_standards_decay_%               ?

#==============================================================================
# REFINEMENT DATA

_refine_special_details
;
    Refinement was performed using all reflections. The weighted 
    R-factor (wR) and goodness of fit (S) are based on F^2^.
    R-factor (gt) are based on F. The threshold expression of
    F^2^ > 2.0 sigma(F^2^) is used only for calculating R-factor (gt).
;
_reflns_number_total                    7030
_reflns_number_gt                       5646
_reflns_threshold_expression            F^2^>2.0\s(F^2^)
_refine_ls_structure_factor_coef        Fsqd
_refine_ls_R_factor_gt                  0.0296
_refine_ls_wR_factor_ref                0.0890
_refine_ls_number_restraints            ?
_refine_ls_hydrogen_treatment           constr
_refine_ls_number_reflns                7030
_refine_ls_number_parameters            384
_refine_ls_goodness_of_fit_ref          1.000
_refine_ls_weighting_scheme             calc
_refine_ls_weighting_details
                               'w = 1/[0.0010Fo^2^ + 0.4250\s(Fo^2^)]/(4Fo^2^)'
_atom_sites_solution_hydrogens          geom
_atom_sites_solution_primary            direct
_atom_sites_solution_secondary          difmap
_refine_ls_shift/su_max                 0.000
_refine_diff_density_max                4.200
_refine_diff_density_min               -1.210
_refine_ls_extinction_method            none
_refine_ls_extinction_coef              ?

loop_
_atom_type_symbol
_atom_type_description
_atom_type_scat_dispersion_real
_atom_type_scat_dispersion_imag
_atom_type_scat_source
  'C' 'C'  0.0033 0.0016 
;
International Tables for Crystallography
(1992, Vol. C, Tables 4.2.6.8 and 6.1.1.4)
;
  'H' 'H'  0.0000 0.0000 
;
International Tables for Crystallography
(1992, Vol. C, Table 6.1.1.4)
;
  'Au' 'Au'  -2.0133 8.8022 
;
International Tables for Crystallography
(1992, Vol. C, Tables 4.2.6.8 and 6.1.1.4)
;
  'N' 'N'  0.0061 0.0033 
;
International Tables for Crystallography
(1992, Vol. C, Tables 4.2.6.8 and 6.1.1.4)
;
  'O' 'O'  0.0106 0.0060 
;
International Tables for Crystallography
(1992, Vol. C, Tables 4.2.6.8 and 6.1.1.4)
;

#==============================================================================
# ATOMIC COORDINATES AND THERMAL PARAMETERS

loop_
_atom_site_label
_atom_site_type_symbol
_atom_site_fract_x
_atom_site_fract_y
_atom_site_fract_z
_atom_site_U_iso_or_equiv
_atom_site_adp_type
_atom_site_occupancy
_atom_site_symmetry_multiplicity
_atom_site_calc_flag
_atom_site_refinement_flags
_atom_site_disorder_assembly
_atom_site_disorder_group
 Au1 Au 0.405880(10) 0.118940(10) 0.700020(10) 0.01518(5) Uani 1.0 4 d . . .
 O1 O 0.4670(3) 0.26811(16) 0.58869(14) 0.0318(8) Uani 1.0 4 d . . .
 O2 O 0.6649(4) 0.3278(2) 0.58898(17) 0.0463(10) Uani 1.0 4 d . . .
 O3 O 0.5257(3) 0.36238(17) 0.66975(17) 0.0352(9) Uani 1.0 4 d . . .
 N1 N 0.5436(3) 0.03171(16) 0.82912(14) 0.0163(7) Uani 1.0 4 d . . .
 N2 N 0.5730(3) -0.03206(16) 0.73239(14) 0.0168(7) Uani 1.0 4 d . . .
 C1 C 0.5616(4) 0.3187(3) 0.6126(2) 0.0303(11) Uani 1.0 4 d . . .
 C2 C 0.4032(4) 0.3309(3) 0.6907(2) 0.0290(11) Uani 1.0 4 d . . .
 C3 C 0.3480(4) 0.2806(3) 0.62597(19) 0.0250(10) Uani 1.0 4 d . . .
 C4 C 0.2884(4) 0.2029(2) 0.64663(19) 0.0238(10) Uani 1.0 4 d . . .
 C5 C 0.1583(4) 0.1974(3) 0.6339(3) 0.0412(13) Uani 1.0 4 d . . .
 C6 C 0.5161(3) 0.03480(19) 0.75687(17) 0.0162(8) Uani 1.0 4 d . . .
 C7 C 0.6165(4) -0.0357(2) 0.85052(19) 0.0210(9) Uani 1.0 4 d . . .
 C8 C 0.6355(4) -0.0761(2) 0.78939(18) 0.0226(9) Uani 1.0 4 d . . .
 C9 C 0.5090(4) 0.0947(2) 0.87816(17) 0.0175(8) Uani 1.0 4 d . . .
 C10 C 0.5990(4) 0.1581(2) 0.89179(19) 0.0204(9) Uani 1.0 4 d . . .
 C11 C 0.5657(4) 0.2177(2) 0.94034(19) 0.0242(9) Uani 1.0 4 d . . .
 C12 C 0.4484(4) 0.2132(2) 0.97222(19) 0.0245(9) Uani 1.0 4 d . . .
 C13 C 0.3620(4) 0.1508(3) 0.95721(19) 0.0219(9) Uani 1.0 4 d . . .
 C14 C 0.3902(4) 0.0898(2) 0.90860(17) 0.0175(9) Uani 1.0 4 d . . .
 C15 C 0.5753(4) -0.0526(2) 0.65707(17) 0.0177(8) Uani 1.0 4 d . . .
 C16 C 0.6813(4) -0.0235(2) 0.62103(19) 0.0206(9) Uani 1.0 4 d . . .
 C17 C 0.6836(4) -0.0468(3) 0.5487(2) 0.0267(10) Uani 1.0 4 d . . .
 C18 C 0.5880(4) -0.0956(3) 0.5149(2) 0.0284(11) Uani 1.0 4 d . . .
 C19 C 0.4844(4) -0.1232(2) 0.5520(2) 0.0245(10) Uani 1.0 4 d . . .
 C20 C 0.4757(4) -0.1013(2) 0.62398(19) 0.0208(9) Uani 1.0 4 d . . .
 C21 C 0.7279(4) 0.1646(3) 0.8562(2) 0.0277(10) Uani 1.0 4 d . . .
 C22 C 0.7242(5) 0.2346(3) 0.8042(3) 0.0462(14) Uani 1.0 4 d . . .
 C23 C 0.8480(4) 0.1706(4) 0.9113(3) 0.0435(14) Uani 1.0 4 d . . .
 C24 C 0.2881(4) 0.0238(2) 0.88896(18) 0.0211(9) Uani 1.0 4 d . . .
 C25 C 0.1717(4) 0.0582(3) 0.8406(2) 0.0279(10) Uani 1.0 4 d . . .
 C26 C 0.2391(5) -0.0156(3) 0.9561(2) 0.0329(11) Uani 1.0 4 d . . .
 C27 C 0.7864(4) 0.0317(3) 0.6571(2) 0.0290(11) Uani 1.0 4 d . . .
 C28 C 0.7820(5) 0.1143(3) 0.6206(3) 0.0405(14) Uani 1.0 4 d . . .
 C29 C 0.9234(4) -0.0062(3) 0.6586(3) 0.0428(14) Uani 1.0 4 d . . .
 C30 C 0.3594(4) -0.1295(2) 0.6632(3) 0.0241(10) Uani 1.0 4 d . . .
 C31 C 0.2300(4) -0.0944(3) 0.6270(3) 0.0373(12) Uani 1.0 4 d . . .
 C32 C 0.3515(4) -0.2206(3) 0.6671(3) 0.0324(11) Uani 1.0 4 d . . .
 H1 H 0.4227 0.2989 0.7341 0.0351 Uiso 1.0 4 calc R . .
 H2 H 0.3460 0.3752 0.7012 0.0352 Uiso 1.0 4 calc R . .
 H3 H 0.2830 0.3120 0.5953 0.0298 Uiso 1.0 4 calc R . .
 H4 H 0.1100 0.2400 0.6123 0.0483 Uiso 1.0 4 calc R . .
 H5 H 0.1153 0.1507 0.6459 0.0484 Uiso 1.0 4 calc R . .
 H6 H 0.6461 -0.0504 0.8976 0.0250 Uiso 1.0 4 calc R . .
 H7 H 0.6820 -0.1238 0.7858 0.0272 Uiso 1.0 4 calc R . .
 H8 H 0.6229 0.2607 0.9506 0.0287 Uiso 1.0 4 calc R . .
 H9 H 0.4283 0.2530 1.0046 0.0291 Uiso 1.0 4 calc R . .
 H10 H 0.2836 0.1485 0.9792 0.0263 Uiso 1.0 4 calc R . .
 H11 H 0.7515 -0.0280 0.5230 0.0327 Uiso 1.0 4 calc R . .
 H12 H 0.5927 -0.1108 0.4670 0.0346 Uiso 1.0 4 calc R . .
 H13 H 0.4198 -0.1562 0.5287 0.0295 Uiso 1.0 4 calc R . .
 H14 H 0.7383 0.1155 0.8283 0.0340 Uiso 1.0 4 calc R . .
 H15 H 0.8019 0.2345 0.7787 0.0556 Uiso 1.0 4 calc R . .
 H16 H 0.6469 0.2313 0.7701 0.0559 Uiso 1.0 4 calc R . .
 H17 H 0.7213 0.2834 0.8316 0.0559 Uiso 1.0 4 calc R . .
 H18 H 0.8533 0.1250 0.9431 0.0524 Uiso 1.0 4 calc R . .
 H19 H 0.9274 0.1739 0.8872 0.0522 Uiso 1.0 4 calc R . .
 H20 H 0.8386 0.2186 0.9389 0.0524 Uiso 1.0 4 calc R . .
 H21 H 0.3303 -0.0176 0.8616 0.0251 Uiso 1.0 4 calc R . .
 H22 H 0.1149 0.0152 0.8223 0.0331 Uiso 1.0 4 calc R . .
 H23 H 0.1228 0.0943 0.8682 0.0332 Uiso 1.0 4 calc R . .
 H24 H 0.2039 0.0866 0.8009 0.0332 Uiso 1.0 4 calc R . .
 H25 H 0.3116 -0.0425 0.9831 0.0393 Uiso 1.0 4 calc R . .
 H26 H 0.2048 0.0250 0.9859 0.0394 Uiso 1.0 4 calc R . .
 H27 H 0.1707 -0.0537 0.9417 0.0395 Uiso 1.0 4 calc R . .
 H28 H 0.7671 0.0391 0.7074 0.0348 Uiso 1.0 4 calc R . .
 H29 H 0.6924 0.1266 0.6025 0.0482 Uiso 1.0 4 calc R . .
 H30 H 0.8142 0.1546 0.6549 0.0481 Uiso 1.0 4 calc R . .
 H31 H 0.8364 0.1134 0.5811 0.0481 Uiso 1.0 4 calc R . .
 H32 H 0.9415 -0.0172 0.6098 0.0506 Uiso 1.0 4 calc R . .
 H33 H 0.9888 0.0302 0.6806 0.0506 Uiso 1.0 4 calc R . .
 H34 H 0.9261 -0.0554 0.6857 0.0508 Uiso 1.0 4 calc R . .
 H35 H 0.3719 -0.1086 0.7127 0.0295 Uiso 1.0 4 calc R . .
 H36 H 0.2172 -0.1127 0.5777 0.0452 Uiso 1.0 4 calc R . .
 H37 H 0.1573 -0.1120 0.6524 0.0452 Uiso 1.0 4 calc R . .
 H38 H 0.2342 -0.0369 0.6277 0.0451 Uiso 1.0 4 calc R . .
 H39 H 0.4315 -0.2406 0.6928 0.0391 Uiso 1.0 4 calc R . .
 H40 H 0.2772 -0.2362 0.6921 0.0392 Uiso 1.0 4 calc R . .
 H41 H 0.3419 -0.2425 0.6191 0.0392 Uiso 1.0 4 calc R . .


loop_
_atom_site_aniso_label
_atom_site_aniso_U_11
_atom_site_aniso_U_22
_atom_site_aniso_U_33
_atom_site_aniso_U_12
_atom_site_aniso_U_13
_atom_site_aniso_U_23
 Au1 0.01836(10) 0.01578(9) 0.01147(9) 0.00200(4) 0.00179(6) 0.00127(4)
 O1 0.0379(16) 0.0339(16) 0.0238(14) -0.0117(12) 0.0045(12) 0.0008(11)
 O2 0.0451(19) 0.054(3) 0.0426(19) -0.0168(16) 0.0187(16) -0.0031(16)
 O3 0.0368(17) 0.0335(16) 0.0360(17) -0.0080(13) 0.0078(13) -0.0067(13)
 N1 0.0209(14) 0.0149(13) 0.0131(13) 0.0029(10) 0.0023(11) -0.0010(10)
 N2 0.0207(14) 0.0156(14) 0.0140(14) 0.0040(10) 0.0014(11) -0.0009(11)
 C1 0.032(3) 0.031(3) 0.029(2) -0.0042(16) 0.0056(17) 0.0052(16)
 C2 0.029(3) 0.022(2) 0.037(3) 0.0015(14) 0.0079(18) -0.0018(15)
 C3 0.0236(19) 0.0271(19) 0.0241(19) 0.0018(14) 0.0008(15) 0.0072(15)
 C4 0.029(2) 0.0208(18) 0.0216(18) 0.0011(14) 0.0008(15) 0.0064(14)
 C5 0.031(3) 0.040(3) 0.050(3) -0.0021(18) -0.0089(19) 0.022(2)
 C6 0.0165(16) 0.0154(15) 0.0171(16) -0.0002(12) 0.0039(13) -0.0017(12)
 C7 0.0281(19) 0.0159(16) 0.0184(17) 0.0061(13) -0.0013(14) 0.0007(13)
 C8 0.0271(19) 0.0222(18) 0.0185(17) 0.0080(14) 0.0021(14) 0.0004(14)
 C9 0.0266(18) 0.0149(15) 0.0106(15) 0.0036(13) -0.0004(13) 0.0002(12)
 C10 0.0213(17) 0.0199(18) 0.0199(17) 0.0001(13) 0.0019(13) 0.0014(13)
 C11 0.032(2) 0.0174(17) 0.0225(18) -0.0023(13) -0.0020(15) -0.0060(14)
 C12 0.033(2) 0.0177(17) 0.0219(18) 0.0056(14) -0.0007(15) -0.0085(14)
 C13 0.0212(18) 0.0255(19) 0.0191(18) 0.0042(14) 0.0019(14) -0.0036(14)
 C14 0.0230(18) 0.0147(16) 0.0143(16) 0.0027(13) -0.0010(13) -0.0008(13)
 C15 0.0213(17) 0.0192(17) 0.0130(16) 0.0058(12) 0.0037(13) -0.0029(12)
 C16 0.0172(17) 0.0234(18) 0.0219(18) 0.0028(13) 0.0059(14) -0.0004(14)
 C17 0.0246(19) 0.033(2) 0.0243(19) 0.0044(15) 0.0116(15) 0.0023(16)
 C18 0.043(3) 0.030(2) 0.0132(18) 0.0046(17) 0.0081(16) -0.0022(15)
 C19 0.028(2) 0.027(2) 0.0194(19) -0.0017(13) 0.0032(16) -0.0063(13)
 C20 0.0211(18) 0.0223(17) 0.0193(18) 0.0027(14) 0.0029(14) -0.0033(14)
 C21 0.032(2) 0.0252(19) 0.028(2) -0.0079(15) 0.0117(16) -0.0010(15)
 C22 0.039(3) 0.057(3) 0.044(3) 0.001(2) 0.009(2) 0.027(3)
 C23 0.025(3) 0.066(4) 0.040(3) -0.003(2) 0.0051(19) 0.020(3)
 C24 0.0228(18) 0.0205(17) 0.0198(17) -0.0001(13) 0.0003(14) -0.0041(13)
 C25 0.029(2) 0.028(2) 0.0255(19) -0.0032(15) -0.0032(16) 0.0003(15)
 C26 0.050(3) 0.025(2) 0.024(2) -0.0127(17) 0.0037(18) -0.0002(15)
 C27 0.025(2) 0.037(3) 0.025(2) -0.0033(16) 0.0027(16) -0.0027(16)
 C28 0.034(3) 0.033(3) 0.053(4) -0.0017(16) -0.005(3) -0.0006(19)
 C29 0.025(3) 0.046(3) 0.056(3) -0.0018(18) -0.003(2) 0.012(3)
 C30 0.026(2) 0.027(2) 0.0199(19) -0.0001(14) 0.0071(16) -0.0048(14)
 C31 0.026(3) 0.040(3) 0.047(3) 0.0039(18) 0.0089(19) 0.008(2)
 C32 0.032(3) 0.029(2) 0.036(3) -0.0010(16) 0.0065(18) 0.0002(17)

#==============================================================================
_computing_data_collection             'CrystalClear (Rigaku Inc., 2008)'
_computing_cell_refinement              CrystalClear
_computing_data_reduction               CrystalClear
_computing_structure_solution          'SIR2002 (Burla, et al., 2003)'
_computing_structure_refinement        'CRYSTALS (Carruthers, et al., 1999)'
_computing_publication_material        'CrystalStructure 4.0 (Rigaku, 2010)'
_computing_molecular_graphics          'CrystalStructure 4.0'

#==============================================================================
# MOLECULAR GEOMETRY

_geom_special_details
;
    ENTER SPECIAL DETAILS OF THE MOLECULAR GEOMETRY
;

loop_
_geom_bond_atom_site_label_1
_geom_bond_atom_site_label_2
_geom_bond_distance
_geom_bond_publ_flag
_geom_bond_site_symmetry_1
_geom_bond_site_symmetry_2
Au1 C4 2.033(4) yes . .
Au1 C6 2.025(3) yes . .
O1 C1 1.322(5) yes . .
O1 C3 1.465(5) yes . .
O2 C1 1.185(6) yes . .
O3 C1 1.365(5) yes . .
O3 C2 1.439(5) yes . .
N1 C6 1.344(4) yes . .
N1 C7 1.382(5) yes . .
N1 C9 1.454(5) yes . .
N2 C6 1.354(5) yes . .
N2 C8 1.389(5) yes . .
N2 C15 1.442(5) yes . .
C2 C3 1.527(6) yes . .
C3 C4 1.494(6) yes . .
C4 C5 1.322(6) yes . .
C7 C8 1.349(5) yes . .
C9 C10 1.403(5) yes . .
C9 C14 1.383(5) yes . .
C10 C11 1.405(5) yes . .
C10 C21 1.526(6) yes . .
C11 C12 1.383(6) yes . .
C12 C13 1.372(5) yes . .
C13 C14 1.407(5) yes . .
C14 C24 1.530(5) yes . .
C15 C16 1.408(5) yes . .
C15 C20 1.391(5) yes . .
C16 C17 1.400(6) yes . .
C16 C27 1.515(5) yes . .
C17 C18 1.370(6) yes . .
C18 C19 1.392(6) yes . .
C19 C20 1.396(6) yes . .
C20 C30 1.521(6) yes . .
C21 C22 1.512(7) yes . .
C21 C23 1.517(6) yes . .
C24 C25 1.524(5) yes . .
C24 C26 1.535(6) yes . .
C27 C28 1.532(6) yes . .
C27 C29 1.525(6) yes . .
C30 C31 1.533(6) yes . .
C30 C32 1.521(6) yes . .
C2 H1 0.970 no . .
C2 H2 0.970 no . .
C3 H3 0.980 no . .
C5 H4 0.930 no . .
C5 H5 0.930 no . .
C7 H6 0.930 no . .
C8 H7 0.930 no . .
C11 H8 0.930 no . .
C12 H9 0.930 no . .
C13 H10 0.930 no . .
C17 H11 0.930 no . .
C18 H12 0.930 no . .
C19 H13 0.930 no . .
C21 H14 0.980 no . .
C22 H15 0.960 no . .
C22 H16 0.960 no . .
C22 H17 0.960 no . .
C23 H18 0.960 no . .
C23 H19 0.960 no . .
C23 H20 0.960 no . .
C24 H21 0.980 no . .
C25 H22 0.960 no . .
C25 H23 0.960 no . .
C25 H24 0.960 no . .
C26 H25 0.960 no . .
C26 H26 0.960 no . .
C26 H27 0.960 no . .
C27 H28 0.980 no . .
C28 H29 0.960 no . .
C28 H30 0.960 no . .
C28 H31 0.960 no . .
C29 H32 0.960 no . .
C29 H33 0.960 no . .
C29 H34 0.960 no . .
C30 H35 0.980 no . .
C31 H36 0.960 no . .
C31 H37 0.960 no . .
C31 H38 0.960 no . .
C32 H39 0.960 no . .
C32 H40 0.960 no . .
C32 H41 0.960 no . .

loop_
_geom_angle_atom_site_label_1
_geom_angle_atom_site_label_2
_geom_angle_atom_site_label_3
_geom_angle
_geom_angle_publ_flag
_geom_angle_site_symmetry_1
_geom_angle_site_symmetry_2
_geom_angle_site_symmetry_3
C4 Au1 C6 177.12(15) yes . . .
C1 O1 C3 110.9(3) yes . . .
C1 O3 C2 108.7(3) yes . . .
C6 N1 C7 111.8(3) yes . . .
C6 N1 C9 123.9(3) yes . . .
C7 N1 C9 124.2(3) yes . . .
C6 N2 C8 110.9(3) yes . . .
C6 N2 C15 124.7(3) yes . . .
C8 N2 C15 124.3(3) yes . . .
O1 C1 O2 126.7(4) yes . . .
O1 C1 O3 111.1(4) yes . . .
O2 C1 O3 122.2(4) yes . . .
O3 C2 C3 104.3(3) yes . . .
O1 C3 C2 101.2(3) yes . . .
O1 C3 C4 111.9(3) yes . . .
C2 C3 C4 113.6(3) yes . . .
Au1 C4 C3 119.2(3) yes . . .
Au1 C4 C5 124.6(3) yes . . .
C3 C4 C5 115.9(4) yes . . .
Au1 C6 N1 126.6(3) yes . . .
Au1 C6 N2 128.8(3) yes . . .
N1 C6 N2 104.5(3) yes . . .
N1 C7 C8 106.2(3) yes . . .
N2 C8 C7 106.6(3) yes . . .
N1 C9 C10 117.5(3) yes . . .
N1 C9 C14 119.1(3) yes . . .
C10 C9 C14 123.3(4) yes . . .
C9 C10 C11 117.0(4) yes . . .
C9 C10 C21 123.2(4) yes . . .
C11 C10 C21 119.8(3) yes . . .
C10 C11 C12 120.5(4) yes . . .
C11 C12 C13 121.0(4) yes . . .
C12 C13 C14 120.7(4) yes . . .
C9 C14 C13 117.4(3) yes . . .
C9 C14 C24 122.8(3) yes . . .
C13 C14 C24 119.7(3) yes . . .
N2 C15 C16 117.7(3) yes . . .
N2 C15 C20 119.1(3) yes . . .
C16 C15 C20 123.2(3) yes . . .
C15 C16 C17 116.5(3) yes . . .
C15 C16 C27 122.5(4) yes . . .
C17 C16 C27 121.0(4) yes . . .
C16 C17 C18 121.8(4) yes . . .
C17 C18 C19 120.3(4) yes . . .
C18 C19 C20 120.7(4) yes . . .
C15 C20 C19 117.6(4) yes . . .
C15 C20 C30 122.2(4) yes . . .
C19 C20 C30 120.1(4) yes . . .
C10 C21 C22 111.3(4) yes . . .
C10 C21 C23 112.3(4) yes . . .
C22 C21 C23 110.4(4) yes . . .
C14 C24 C25 109.8(3) yes . . .
C14 C24 C26 112.3(3) yes . . .
C25 C24 C26 110.2(3) yes . . .
C16 C27 C28 111.1(4) yes . . .
C16 C27 C29 111.0(4) yes . . .
C28 C27 C29 111.6(4) yes . . .
C20 C30 C31 110.1(4) yes . . .
C20 C30 C32 112.2(4) yes . . .
C31 C30 C32 110.8(4) yes . . .
O3 C2 H1 108.282 no . . .
O3 C2 H2 109.120 no . . .
C3 C2 H1 112.385 no . . .
C3 C2 H2 113.290 no . . .
H1 C2 H2 109.227 no . . .
O1 C3 H3 109.954 no . . .
C2 C3 H3 109.791 no . . .
C4 C3 H3 110.144 no . . .
C4 C5 H4 120.035 no . . .
C4 C5 H5 119.951 no . . .
H4 C5 H5 120.008 no . . .
N1 C7 H6 126.853 no . . .
C8 C7 H6 126.905 no . . .
N2 C8 H7 126.366 no . . .
C7 C8 H7 127.016 no . . .
C10 C11 H8 119.446 no . . .
C12 C11 H8 120.018 no . . .
C11 C12 H9 119.435 no . . .
C13 C12 H9 119.610 no . . .
C12 C13 H10 119.971 no . . .
C14 C13 H10 119.282 no . . .
C16 C17 H11 118.741 no . . .
C18 C17 H11 119.494 no . . .
C17 C18 H12 120.024 no . . .
C19 C18 H12 119.664 no . . .
C18 C19 H13 119.855 no . . .
C20 C19 H13 119.489 no . . .
C10 C21 H14 108.064 no . . .
C22 C21 H14 107.719 no . . .
C23 C21 H14 106.819 no . . .
C21 C22 H15 110.072 no . . .
C21 C22 H16 110.130 no . . .
C21 C22 H17 108.290 no . . .
H15 C22 H16 109.440 no . . .
H15 C22 H17 109.444 no . . .
H16 C22 H17 109.444 no . . .
C21 C23 H18 110.841 no . . .
C21 C23 H19 110.238 no . . .
C21 C23 H20 107.394 no . . .
H18 C23 H19 109.444 no . . .
H18 C23 H20 109.440 no . . .
H19 C23 H20 109.449 no . . .
C14 C24 H21 108.017 no . . .
C25 C24 H21 108.214 no . . .
C26 C24 H21 108.189 no . . .
C24 C25 H22 109.499 no . . .
C24 C25 H23 109.451 no . . .
C24 C25 H24 109.554 no . . .
H22 C25 H23 109.440 no . . .
H22 C25 H24 109.441 no . . .
H23 C25 H24 109.443 no . . .
C24 C26 H25 109.275 no . . .
C24 C26 H26 109.394 no . . .
C24 C26 H27 109.834 no . . .
H25 C26 H26 109.443 no . . .
H25 C26 H27 109.441 no . . .
H26 C26 H27 109.439 no . . .
C16 C27 H28 107.416 no . . .
C28 C27 H28 108.011 no . . .
C29 C27 H28 107.560 no . . .
C27 C28 H29 109.419 no . . .
C27 C28 H30 109.872 no . . .
C27 C28 H31 109.197 no . . .
H29 C28 H30 109.449 no . . .
H29 C28 H31 109.445 no . . .
H30 C28 H31 109.445 no . . .
C27 C29 H32 108.669 no . . .
C27 C29 H33 109.781 no . . .
C27 C29 H34 110.043 no . . .
H32 C29 H33 109.446 no . . .
H32 C29 H34 109.442 no . . .
H33 C29 H34 109.443 no . . .
C20 C30 H35 107.681 no . . .
C31 C30 H35 107.637 no . . .
C32 C30 H35 108.220 no . . .
C30 C31 H36 109.072 no . . .
C30 C31 H37 109.560 no . . .
C30 C31 H38 109.866 no . . .
H36 C31 H37 109.448 no . . .
H36 C31 H38 109.443 no . . .
H37 C31 H38 109.438 no . . .
C30 C32 H39 108.876 no . . .
C30 C32 H40 109.987 no . . .
C30 C32 H41 109.633 no . . .
H39 C32 H40 109.444 no . . .
H39 C32 H41 109.436 no . . .
H40 C32 H41 109.450 no . . .

loop_
_geom_torsion_atom_site_label_1
_geom_torsion_atom_site_label_2
_geom_torsion_atom_site_label_3
_geom_torsion_atom_site_label_4
_geom_torsion
_geom_torsion_publ_flag
_geom_torsion_site_symmetry_1
_geom_torsion_site_symmetry_2
_geom_torsion_site_symmetry_3
_geom_torsion_site_symmetry_4
C1 O1 C3 C2 -15.6(4) no . . . .
C1 O1 C3 C4 -136.9(3) no . . . .
C3 O1 C1 O2 -173.3(4) no . . . .
C3 O1 C1 O3 6.0(4) no . . . .
C1 O3 C2 C3 -16.8(4) no . . . .
C2 O3 C1 O1 7.5(4) no . . . .
C2 O3 C1 O2 -173.2(4) no . . . .
C6 N1 C7 C8 0.2(4) no . . . .
C7 N1 C6 Au1 177.2(3) no . . . .
C7 N1 C6 N2 -0.0(4) no . . . .
C6 N1 C9 C10 -87.0(4) no . . . .
C6 N1 C9 C14 92.7(4) no . . . .
C9 N1 C6 Au1 -6.9(5) no . . . .
C9 N1 C6 N2 175.8(3) no . . . .
C7 N1 C9 C10 88.3(4) no . . . .
C7 N1 C9 C14 -92.0(4) no . . . .
C9 N1 C7 C8 -175.6(3) no . . . .
C6 N2 C8 C7 0.2(4) no . . . .
C8 N2 C6 Au1 -177.3(3) no . . . .
C8 N2 C6 N1 -0.1(4) no . . . .
C6 N2 C15 C16 88.6(4) no . . . .
C6 N2 C15 C20 -92.8(4) no . . . .
C15 N2 C6 Au1 6.1(5) no . . . .
C15 N2 C6 N1 -176.7(3) no . . . .
C8 N2 C15 C16 -87.5(4) no . . . .
C8 N2 C15 C20 91.0(4) no . . . .
C15 N2 C8 C7 176.9(3) no . . . .
O3 C2 C3 O1 18.9(4) no . . . .
O3 C2 C3 C4 138.9(3) no . . . .
O1 C3 C4 Au1 50.0(4) no . . . .
O1 C3 C4 C5 -135.8(3) no . . . .
C2 C3 C4 Au1 -63.8(4) no . . . .
C2 C3 C4 C5 110.4(4) no . . . .
N1 C7 C8 N2 -0.2(4) no . . . .
N1 C9 C10 C11 -178.8(3) no . . . .
N1 C9 C10 C21 1.7(5) no . . . .
N1 C9 C14 C13 178.4(3) no . . . .
N1 C9 C14 C24 -4.4(5) no . . . .
C10 C9 C14 C13 -2.0(5) no . . . .
C10 C9 C14 C24 175.2(3) no . . . .
C14 C9 C10 C11 1.6(5) no . . . .
C14 C9 C10 C21 -178.0(3) no . . . .
C9 C10 C11 C12 -0.5(5) no . . . .
C9 C10 C21 C22 111.9(4) no . . . .
C9 C10 C21 C23 -123.7(4) no . . . .
C11 C10 C21 C22 -67.6(4) no . . . .
C11 C10 C21 C23 56.8(4) no . . . .
C21 C10 C11 C12 179.0(3) no . . . .
C10 C11 C12 C13 -0.1(5) no . . . .
C11 C12 C13 C14 -0.4(5) no . . . .
C12 C13 C14 C9 1.3(5) no . . . .
C12 C13 C14 C24 -176.0(3) no . . . .
C9 C14 C24 C25 -105.4(4) no . . . .
C9 C14 C24 C26 131.6(3) no . . . .
C13 C14 C24 C25 71.7(4) no . . . .
C13 C14 C24 C26 -51.2(4) no . . . .
N2 C15 C16 C17 177.8(3) no . . . .
N2 C15 C16 C27 -3.6(5) no . . . .
N2 C15 C20 C19 -177.0(3) no . . . .
N2 C15 C20 C30 3.8(5) no . . . .
C16 C15 C20 C19 1.5(5) no . . . .
C16 C15 C20 C30 -177.7(3) no . . . .
C20 C15 C16 C17 -0.7(5) no . . . .
C20 C15 C16 C27 177.8(3) no . . . .
C15 C16 C17 C18 -0.3(5) no . . . .
C15 C16 C27 C28 -115.2(4) no . . . .
C15 C16 C27 C29 120.0(4) no . . . .
C17 C16 C27 C28 63.3(5) no . . . .
C17 C16 C27 C29 -61.5(5) no . . . .
C27 C16 C17 C18 -178.9(3) no . . . .
C16 C17 C18 C19 0.4(6) no . . . .
C17 C18 C19 C20 0.4(6) no . . . .
C18 C19 C20 C15 -1.4(5) no . . . .
C18 C19 C20 C30 177.9(3) no . . . .
C15 C20 C30 C31 115.6(4) no . . . .
C15 C20 C30 C32 -120.5(4) no . . . .
C19 C20 C30 C31 -63.6(4) no . . . .
C19 C20 C30 C32 60.3(5) no . . . .

loop_
_geom_contact_atom_site_label_1
_geom_contact_atom_site_label_2
_geom_contact_distance
_geom_contact_publ_flag
_geom_contact_site_symmetry_1
_geom_contact_site_symmetry_2
Au1 O1 3.329(3) no . .
Au1 C2 3.535(5) no . .
Au1 C9 3.394(4) no . .
Au1 C15 3.469(4) no . .
O1 C5 3.525(6) no . .
O2 C2 3.409(5) no . .
O2 C3 3.446(5) no . .
O3 C4 3.583(5) no . .
N1 C15 3.533(5) no . .
N1 C21 2.911(5) no . .
N1 C24 2.923(5) no . .
N2 C9 3.542(5) no . .
N2 C27 2.893(5) no . .
N2 C30 2.906(5) no . .
C1 C4 3.487(6) no . .
C2 C5 3.424(6) no . .
C6 C10 3.284(5) no . .
C6 C14 3.334(5) no . .
C6 C16 3.308(5) no . .
C6 C20 3.346(5) no . .
C6 C21 3.453(5) no . .
C6 C24 3.538(5) no . .
C6 C27 3.458(6) no . .
C6 C30 3.536(5) no . .
C7 C10 3.326(5) no . .
C7 C14 3.361(5) no . .
C7 C15 3.586(5) no . .
C7 C21 3.522(6) no . .
C8 C9 3.587(5) no . .
C8 C16 3.322(5) no . .
C8 C20 3.356(5) no . .
C8 C27 3.513(6) no . .
C8 C30 3.585(5) no . .
C9 C12 2.746(5) no . .
C9 C22 3.561(6) no . .
C9 C25 3.481(5) no . .
C10 C13 2.803(6) no . .
C11 C14 2.803(5) no . .
C11 C22 3.139(6) no . .
C11 C23 3.070(6) no . .
C13 C25 3.159(5) no . .
C13 C26 3.038(6) no . .
C15 C18 2.751(5) no . .
C15 C28 3.588(6) no . .
C15 C31 3.565(6) no . .
C16 C19 2.810(5) no . .
C17 C20 2.795(6) no . .
C17 C28 3.117(6) no . .
C17 C29 3.095(6) no . .
C19 C31 3.089(6) no . .
C19 C32 3.096(6) no . .
O1 C18 3.473(5) no . 3_656
O1 C23 3.545(6) no . 4_454
O2 C7 3.297(5) no . 2_656
O2 C8 3.298(5) no . 2_656
O2 C13 3.328(5) no . 4_554
O3 C8 3.599(5) no . 2_656
C7 O2 3.297(5) no . 2_646
C8 O2 3.298(5) no . 2_646
C8 O3 3.599(5) no . 2_646
C13 O2 3.328(5) no . 4_455
C18 O1 3.473(5) no . 3_656
C23 O1 3.545(6) no . 4_555
C29 C31 3.544(6) no . 1_655
C31 C29 3.544(6) no . 1_455
Au1 H1 3.0646 no . .
Au1 H5 3.0680 no . .
Au1 H16 3.2500 no . .
Au1 H24 2.9593 no . .
Au1 H29 3.5767 no . .
Au1 H38 3.3344 no . .
O1 H1 2.8271 no . .
O1 H2 3.0919 no . .
O1 H29 3.2782 no . .
O2 H29 3.3710 no . .
O2 H30 3.4294 no . .
O3 H3 2.8322 no . .
O3 H16 3.0506 no . .
N1 H7 3.0904 no . .
N1 H14 2.4211 no . .
N1 H21 2.4470 no . .
N1 H24 3.5572 no . .
N1 H28 3.3582 no . .
N1 H35 3.5260 no . .
N2 H6 3.1005 no . .
N2 H14 3.3832 no . .
N2 H28 2.3842 no . .
N2 H35 2.4044 no . .
C1 H1 2.7953 no . .
C1 H2 3.0152 no . .
C1 H3 2.8186 no . .
C1 H16 3.3059 no . .
C1 H29 3.4775 no . .
C2 H4 3.5252 no . .
C2 H16 3.2149 no . .
C3 H4 2.4986 no . .
C3 H5 3.2507 no . .
C4 H1 2.5723 no . .
C4 H2 3.0802 no . .
C5 H1 3.5415 no . .
C5 H3 2.4355 no . .
C5 H24 3.5997 no . .
C6 H6 3.1487 no . .
C6 H7 3.1501 no . .
C6 H14 2.8409 no . .
C6 H16 3.5319 no . .
C6 H21 2.9707 no . .
C6 H24 3.4598 no . .
C6 H28 2.7932 no . .
C6 H35 2.8784 no . .
C7 H14 2.8533 no . .
C7 H21 2.9489 no . .
C7 H28 3.4277 no . .
C7 H35 3.5975 no . .
C8 H14 3.4124 no . .
C8 H28 2.8604 no . .
C8 H35 2.9557 no . .
C9 H6 2.7952 no . .
C9 H8 3.2388 no . .
C9 H10 3.2248 no . .
C9 H14 2.6113 no . .
C9 H16 3.4225 no . .
C9 H21 2.6036 no . .
C9 H24 3.2867 no . .
C10 H6 3.5058 no . .
C10 H9 3.2557 no . .
C10 H15 3.3353 no . .
C10 H16 2.6539 no . .
C10 H17 2.7237 no . .
C10 H18 2.7195 no . .
C10 H19 3.3536 no . .
C10 H20 2.6987 no . .
C11 H10 3.2342 no . .
C11 H14 3.3177 no . .
C11 H16 3.3510 no . .
C11 H17 2.8967 no . .
C11 H18 3.2989 no . .
C11 H20 2.7730 no . .
C13 H8 3.2328 no . .
C13 H21 3.3182 no . .
C13 H23 2.9540 no . .
C13 H24 3.3511 no . .
C13 H25 3.3028 no . .
C13 H26 2.7182 no . .
C14 H6 3.5143 no . .
C14 H9 3.2523 no . .
C14 H22 3.3242 no . .
C14 H23 2.7464 no . .
C14 H24 2.6154 no . .
C14 H25 2.7611 no . .
C14 H26 2.7022 no . .
C14 H27 3.3659 no . .
C15 H7 2.7890 no . .
C15 H11 3.2303 no . .
C15 H13 3.2267 no . .
C15 H28 2.5778 no . .
C15 H29 3.4046 no . .
C15 H34 3.5499 no . .
C15 H35 2.5728 no . .
C15 H38 3.4631 no . .
C15 H39 3.5441 no . .
C16 H7 3.4842 no . .
C16 H12 3.2558 no . .
C16 H29 2.5276 no . .
C16 H30 3.2934 no . .
C16 H31 2.9074 no . .
C16 H32 2.6720 no . .
C16 H33 3.3309 no . .
C16 H34 2.7050 no . .
C17 H13 3.2313 no . .
C17 H28 3.3103 no . .
C17 H29 3.0538 no . .
C17 H31 3.1145 no . .
C17 H32 2.7939 no . .
C17 H34 3.3659 no . .
C19 H11 3.2320 no . .
C19 H35 3.3064 no . .
C19 H36 2.8058 no . .
C19 H38 3.3460 no . .
C19 H39 3.3488 no . .
C19 H41 2.8191 no . .
C20 H7 3.5096 no . .
C20 H12 3.2569 no . .
C20 H36 2.6871 no . .
C20 H37 3.3310 no . .
C20 H38 2.6837 no . .
C20 H39 2.7075 no . .
C20 H40 3.3496 no . .
C20 H41 2.7141 no . .
C21 H8 2.6707 no . .
C21 H28 3.5187 no . .
C22 H1 3.3807 no . .
C22 H8 3.0297 no . .
C22 H18 3.3225 no . .
C22 H19 2.6517 no . .
C22 H20 2.6660 no . .
C22 H30 3.2863 no . .
C23 H8 2.8873 no . .
C23 H15 2.6811 no . .
C23 H16 3.3188 no . .
C23 H17 2.6458 no . .
C24 H10 2.6713 no . .
C25 H10 3.0984 no . .
C25 H25 3.3305 no . .
C25 H26 2.7421 no . .
C25 H27 2.6457 no . .
C26 H10 2.7964 no . .
C26 H22 2.7236 no . .
C26 H23 2.6524 no . .
C26 H24 3.3361 no . .
C27 H11 2.6722 no . .
C27 H14 3.5488 no . .
C28 H11 2.9804 no . .
C28 H15 3.5426 no . .
C28 H32 2.7427 no . .
C28 H33 2.6754 no . .
C28 H34 3.3533 no . .
C29 H11 2.9420 no . .
C29 H29 3.3164 no . .
C29 H30 2.8961 no . .
C29 H31 2.5625 no . .
C30 H13 2.6661 no . .
C31 H13 2.9643 no . .
C31 H39 3.3344 no . .
C31 H40 2.6763 no . .
C31 H41 2.7260 no . .
C32 H13 2.9300 no . .
C32 H36 2.7199 no . .
C32 H37 2.6701 no . .
C32 H38 3.3394 no . .
H1 H3 2.8258 no . .
H1 H16 2.5690 no . .
H1 H17 3.3854 no . .
H2 H3 2.2672 no . .
H2 H4 3.5730 no . .
H3 H4 2.1754 no . .
H3 H5 3.3625 no . .
H5 H24 3.1186 no . .
H5 H38 3.3782 no . .
H6 H7 2.4675 no . .
H6 H14 3.2257 no . .
H6 H21 3.2573 no . .
H7 H28 3.2360 no . .
H7 H34 3.4345 no . .
H7 H35 3.3133 no . .
H7 H39 3.5178 no . .
H8 H9 2.3051 no . .
H8 H14 3.5913 no . .
H8 H16 3.4185 no . .
H8 H17 2.5401 no . .
H8 H18 3.2657 no . .
H8 H20 2.3295 no . .
H9 H10 2.2964 no . .
H10 H21 3.5847 no . .
H10 H23 2.6578 no . .
H10 H24 3.4854 no . .
H10 H25 3.1955 no . .
H10 H26 2.2158 no . .
H11 H12 2.2934 no . .
H11 H28 3.5894 no . .
H11 H29 3.0559 no . .
H11 H31 2.6957 no . .
H11 H32 2.3958 no . .
H11 H34 3.3798 no . .
H12 H13 2.3150 no . .
H13 H35 3.5865 no . .
H13 H36 2.4390 no . .
H13 H38 3.3996 no . .
H13 H39 3.3462 no . .
H13 H41 2.4016 no . .
H14 H15 2.3051 no . .
H14 H16 2.3568 no . .
H14 H17 2.8028 no . .
H14 H18 2.3325 no . .
H14 H19 2.3273 no . .
H14 H20 2.7918 no . .
H14 H28 2.6220 no . .
H14 H30 3.4464 no . .
H15 H18 3.5500 no . .
H15 H19 2.4895 no . .
H15 H20 2.9738 no . .
H15 H28 3.5180 no . .
H15 H30 2.6700 no . .
H16 H19 3.5406 no . .
H16 H20 3.5299 no . .
H16 H30 3.1322 no . .
H17 H18 3.5347 no . .
H17 H19 2.8885 no . .
H17 H20 2.4672 no . .
H21 H22 2.3031 no . .
H21 H23 2.8254 no . .
H21 H24 2.3768 no . .
H21 H25 2.3182 no . .
H21 H26 2.8336 no . .
H21 H27 2.3808 no . .
H21 H35 3.2163 no . .
H22 H25 3.5583 no . .
H22 H26 3.0900 no . .
H22 H27 2.5122 no . .
H23 H25 3.5528 no . .
H23 H26 2.5393 no . .
H23 H27 2.8375 no . .
H24 H26 3.5843 no . .
H24 H27 3.5470 no . .
H28 H29 2.4906 no . .
H28 H30 2.2293 no . .
H28 H31 2.8006 no . .
H28 H32 2.8148 no . .
H28 H33 2.3572 no . .
H28 H34 2.3179 no . .
H29 H32 3.4757 no . .
H29 H33 3.5895 no . .
H30 H32 3.2809 no . .
H30 H33 2.7382 no . .
H31 H32 2.4571 no . .
H31 H33 2.6768 no . .
H31 H34 3.4858 no . .
H35 H36 2.8253 no . .
H35 H37 2.3512 no . .
H35 H38 2.3333 no . .
H35 H39 2.3198 no . .
H35 H40 2.3497 no . .
H35 H41 2.8265 no . .
H36 H39 3.5945 no . .
H36 H40 2.9768 no . .
H36 H41 2.5836 no . .
H37 H39 3.5345 no . .
H37 H40 2.4768 no . .
H37 H41 2.9750 no . .
H38 H40 3.5429 no . .
Au1 H12 3.1056 no . 3_656
O1 H12 2.8595 no . 3_656
O1 H13 3.1685 no . 3_656
O1 H18 3.3462 no . 4_454
O1 H20 2.9615 no . 4_454
O1 H27 3.3056 no . 2_556
O2 H6 2.7861 no . 2_656
O2 H7 2.7871 no . 2_656
O2 H9 3.4986 no . 4_554
O2 H10 2.4991 no . 4_554
O2 H26 3.1604 no . 4_554
O3 H7 3.0110 no . 2_656
O3 H22 2.9296 no . 2_556
O3 H27 3.0663 no . 2_556
O3 H34 3.0103 no . 2_656
C1 H7 3.2082 no . 2_656
C1 H10 3.5506 no . 4_554
C1 H27 3.2601 no . 2_556
C2 H21 3.5321 no . 2_556
C2 H22 3.0838 no . 2_556
C2 H27 3.1530 no . 2_556
C2 H34 3.3281 no . 2_656
C2 H37 3.1800 no . 2_556
C2 H40 3.1800 no . 2_556
C3 H12 3.3969 no . 3_656
C3 H20 3.4646 no . 4_454
C3 H27 3.0312 no . 2_556
C4 H12 2.9600 no . 3_656
C4 H40 3.2896 no . 2_556
C5 H8 3.4580 no . 4_454
C5 H9 3.2870 no . 4_454
C5 H12 3.5930 no . 3_656
C5 H33 3.4304 no . 1_455
C5 H39 3.5820 no . 2_556
C5 H40 3.4158 no . 2_556
C7 H25 3.3670 no . 3_657
C7 H26 3.3864 no . 3_657
C8 H15 3.4811 no . 2_646
C9 H25 3.1290 no . 3_657
C10 H25 3.0840 no . 3_657
C11 H3 3.4849 no . 4_555
C11 H4 3.2582 no . 4_555
C11 H25 3.4261 no . 3_657
C12 H4 3.0379 no . 4_555
C12 H36 3.4331 no . 2_556
C12 H41 3.3359 no . 2_556
C13 H6 3.1789 no . 3_657
C13 H40 3.5300 no . 2_556
C13 H41 2.9796 no . 2_556
C14 H25 3.5546 no . 3_657
C15 H17 3.4186 no . 2_646
C16 H17 3.4542 no . 2_646
C18 H20 3.2781 no . 2_646
C18 H29 3.4506 no . 3_656
C19 H20 3.1847 no . 2_646
C19 H29 3.2323 no . 3_656
C22 H7 3.0943 no . 2_656
C22 H39 3.5154 no . 2_656
C23 H3 3.5545 no . 4_555
C23 H23 3.2366 no . 1_655
C23 H25 3.4130 no . 3_657
C23 H27 3.3731 no . 3_657
C23 H39 3.4321 no . 2_656
C23 H41 3.5597 no . 2_656
C24 H2 3.2159 no . 2_546
C25 H2 3.1461 no . 2_546
C25 H19 3.3233 no . 1_455
C25 H33 3.3777 no . 1_455
C25 H39 3.5488 no . 2_556
C25 H40 3.5254 no . 2_556
C25 H41 3.4092 no . 2_556
C26 H2 3.4786 no . 2_546
C26 H3 3.0286 no . 2_546
C26 H6 3.0521 no . 3_657
C26 H18 2.8371 no . 3_657
C28 H5 3.4256 no . 1_655
C28 H9 3.5158 no . 4_554
C28 H13 3.3544 no . 3_656
C29 H5 3.2825 no . 1_655
C29 H22 3.4611 no . 1_655
C29 H37 2.9691 no . 1_655
C29 H38 3.3023 no . 1_655
C30 H2 3.4232 no . 2_546
C31 H2 3.3925 no . 2_546
C31 H11 3.4714 no . 3_656
C31 H32 3.1866 no . 1_455
C31 H33 3.4314 no . 1_455
C31 H34 3.4338 no . 1_455
C32 H1 3.4952 no . 2_546
C32 H19 3.0969 no . 2_646
C32 H23 3.1679 no . 2_546
C32 H24 3.3243 no . 2_546
H1 C32 3.4952 no . 2_556
H1 H34 3.1658 no . 2_656
H1 H35 3.5881 no . 2_556
H1 H37 2.7639 no . 2_556
H1 H40 2.6228 no . 2_556
H2 C24 3.2159 no . 2_556
H2 C25 3.1461 no . 2_556
H2 C26 3.4786 no . 2_556
H2 C30 3.4232 no . 2_556
H2 C31 3.3925 no . 2_556
H2 H21 2.7099 no . 2_556
H2 H22 2.4132 no . 2_556
H2 H24 3.5571 no . 2_556
H2 H27 2.8959 no . 2_556
H2 H34 3.1853 no . 2_656
H2 H35 2.8657 no . 2_556
H2 H37 2.7292 no . 2_556
H2 H40 3.0683 no . 2_556
H3 C11 3.4849 no . 4_454
H3 C23 3.5545 no . 4_454
H3 C26 3.0286 no . 2_556
H3 H8 3.2359 no . 4_454
H3 H18 3.1614 no . 4_454
H3 H20 3.0544 no . 4_454
H3 H21 3.1931 no . 2_556
H3 H25 2.9391 no . 2_556
H3 H27 2.4005 no . 2_556
H4 C11 3.2582 no . 4_454
H4 C12 3.0379 no . 4_454
H4 H8 3.0188 no . 4_454
H4 H9 2.5878 no . 4_454
H4 H30 3.4826 no . 1_455
H4 H31 3.4905 no . 1_455
H5 C28 3.4256 no . 1_455
H5 C29 3.2825 no . 1_455
H5 H9 3.4769 no . 4_454
H5 H30 3.0788 no . 1_455
H5 H31 3.0309 no . 1_455
H5 H32 3.3397 no . 1_455
H5 H33 2.5016 no . 1_455
H5 H39 3.5717 no . 2_556
H6 O2 2.7861 no . 2_646
H6 C13 3.1789 no . 3_657
H6 C26 3.0521 no . 3_657
H6 H10 2.8444 no . 3_657
H6 H25 2.7021 no . 3_657
H6 H26 2.5501 no . 3_657
H7 O2 2.7871 no . 2_646
H7 O3 3.0110 no . 2_646
H7 C1 3.2082 no . 2_646
H7 C22 3.0943 no . 2_646
H7 H15 2.6592 no . 2_646
H7 H16 3.2057 no . 2_646
H7 H17 2.9199 no . 2_646
H8 C5 3.4580 no . 4_555
H8 H3 3.2359 no . 4_555
H8 H4 3.0188 no . 4_555
H9 O2 3.4986 no . 4_455
H9 C5 3.2870 no . 4_555
H9 C28 3.5158 no . 4_455
H9 H4 2.5878 no . 4_555
H9 H5 3.4769 no . 4_555
H9 H30 3.4832 no . 4_455
H9 H31 2.8475 no . 4_455
H9 H36 3.0132 no . 2_556
H9 H41 3.4012 no . 2_556
H10 O2 2.4991 no . 4_455
H10 C1 3.5506 no . 4_455
H10 H6 2.8444 no . 3_657
H10 H41 2.7910 no . 2_556
H11 C31 3.4714 no . 3_656
H11 H36 3.0354 no . 3_656
H11 H38 3.0164 no . 3_656
H12 Au1 3.1056 no . 3_656
H12 O1 2.8595 no . 3_656
H12 C3 3.3969 no . 3_656
H12 C4 2.9600 no . 3_656
H12 C5 3.5930 no . 3_656
H12 H20 3.3717 no . 2_646
H12 H29 3.0628 no . 3_656
H12 H38 3.5833 no . 3_656
H13 O1 3.1685 no . 3_656
H13 C28 3.3544 no . 3_656
H13 H19 3.5182 no . 2_646
H13 H20 3.2314 no . 2_646
H13 H29 2.6323 no . 3_656
H13 H31 3.2240 no . 3_656
H15 C8 3.4811 no . 2_656
H15 H7 2.6592 no . 2_656
H15 H39 2.7381 no . 2_656
H16 H7 3.2057 no . 2_656
H17 C15 3.4186 no . 2_656
H17 C16 3.4542 no . 2_656
H17 H7 2.9199 no . 2_656
H17 H34 3.0767 no . 2_656
H18 O1 3.3462 no . 4_555
H18 C26 2.8371 no . 3_657
H18 H3 3.1614 no . 4_555
H18 H23 3.2291 no . 1_655
H18 H25 2.6500 no . 3_657
H18 H26 2.9123 no . 3_657
H18 H27 2.4795 no . 3_657
H19 C25 3.3233 no . 1_655
H19 C32 3.0969 no . 2_656
H19 H13 3.5182 no . 2_656
H19 H22 3.5382 no . 1_655
H19 H23 2.4411 no . 1_655
H19 H39 2.5892 no . 2_656
H19 H41 2.7374 no . 2_656
H20 O1 2.9615 no . 4_555
H20 C3 3.4646 no . 4_555
H20 C18 3.2781 no . 2_656
H20 C19 3.1847 no . 2_656
H20 H3 3.0544 no . 4_555
H20 H12 3.3717 no . 2_656
H20 H13 3.2314 no . 2_656
H20 H27 3.5365 no . 3_657
H20 H41 3.5762 no . 2_656
H21 C2 3.5321 no . 2_546
H21 H2 2.7099 no . 2_546
H21 H3 3.1931 no . 2_546
H22 O3 2.9296 no . 2_546
H22 C2 3.0838 no . 2_546
H22 C29 3.4611 no . 1_455
H22 H2 2.4132 no . 2_546
H22 H19 3.5382 no . 1_455
H22 H33 2.8211 no . 1_455
H22 H34 3.2453 no . 1_455
H23 C23 3.2366 no . 1_455
H23 C32 3.1679 no . 2_556
H23 H18 3.2291 no . 1_455
H23 H19 2.4411 no . 1_455
H23 H39 3.0041 no . 2_556
H23 H40 3.2361 no . 2_556
H23 H41 2.7481 no . 2_556
H24 C32 3.3243 no . 2_556
H24 H2 3.5571 no . 2_546
H24 H33 3.1117 no . 1_455
H24 H39 3.1975 no . 2_556
H24 H40 2.9594 no . 2_556
H24 H41 3.2654 no . 2_556
H25 C7 3.3670 no . 3_657
H25 C9 3.1290 no . 3_657
H25 C10 3.0840 no . 3_657
H25 C11 3.4261 no . 3_657
H25 C14 3.5546 no . 3_657
H25 C23 3.4130 no . 3_657
H25 H3 2.9391 no . 2_546
H25 H6 2.7021 no . 3_657
H25 H18 2.6500 no . 3_657
H26 O2 3.1604 no . 4_455
H26 C7 3.3864 no . 3_657
H26 H6 2.5501 no . 3_657
H26 H18 2.9123 no . 3_657
H27 O1 3.3056 no . 2_546
H27 O3 3.0663 no . 2_546
H27 C1 3.2601 no . 2_546
H27 C2 3.1530 no . 2_546
H27 C3 3.0312 no . 2_546
H27 C23 3.3731 no . 3_657
H27 H2 2.8959 no . 2_546
H27 H3 2.4005 no . 2_546
H27 H18 2.4795 no . 3_657
H27 H20 3.5365 no . 3_657
H29 C18 3.4506 no . 3_656
H29 C19 3.2323 no . 3_656
H29 H12 3.0628 no . 3_656
H29 H13 2.6323 no . 3_656
H29 H36 3.5625 no . 3_656
H30 H4 3.4826 no . 1_655
H30 H5 3.0788 no . 1_655
H30 H9 3.4832 no . 4_554
H31 H4 3.4905 no . 1_655
H31 H5 3.0309 no . 1_655
H31 H9 2.8475 no . 4_554
H31 H13 3.2240 no . 3_656
H31 H36 2.9464 no . 3_656
H32 C31 3.1866 no . 1_655
H32 H5 3.3397 no . 1_655
H32 H36 3.3247 no . 1_655
H32 H37 2.7535 no . 1_655
H32 H38 2.9760 no . 1_655
H33 C5 3.4304 no . 1_655
H33 C25 3.3777 no . 1_655
H33 C31 3.4314 no . 1_655
H33 H5 2.5016 no . 1_655
H33 H22 2.8211 no . 1_655
H33 H24 3.1117 no . 1_655
H33 H37 2.9977 no . 1_655
H33 H38 2.9830 no . 1_655
H34 O3 3.0103 no . 2_646
H34 C2 3.3281 no . 2_646
H34 C31 3.4338 no . 1_655
H34 H1 3.1658 no . 2_646
H34 H2 3.1853 no . 2_646
H34 H17 3.0767 no . 2_646
H34 H22 3.2453 no . 1_655
H34 H37 2.6583 no . 1_655
H34 H38 3.4203 no . 1_655
H35 H1 3.5881 no . 2_546
H35 H2 2.8657 no . 2_546
H36 C12 3.4331 no . 2_546
H36 H9 3.0132 no . 2_546
H36 H11 3.0354 no . 3_656
H36 H29 3.5625 no . 3_656
H36 H31 2.9464 no . 3_656
H36 H32 3.3247 no . 1_455
H37 C2 3.1800 no . 2_546
H37 C29 2.9691 no . 1_455
H37 H1 2.7639 no . 2_546
H37 H2 2.7292 no . 2_546
H37 H32 2.7535 no . 1_455
H37 H33 2.9977 no . 1_455
H37 H34 2.6583 no . 1_455
H38 C29 3.3023 no . 1_455
H38 H11 3.0164 no . 3_656
H38 H12 3.5833 no . 3_656
H38 H32 2.9760 no . 1_455
H38 H33 2.9830 no . 1_455
H38 H34 3.4203 no . 1_455
H39 C5 3.5820 no . 2_546
H39 C22 3.5154 no . 2_646
H39 C23 3.4321 no . 2_646
H39 C25 3.5488 no . 2_546
H39 H5 3.5717 no . 2_546
H39 H15 2.7381 no . 2_646
H39 H19 2.5892 no . 2_646
H39 H23 3.0041 no . 2_546
H39 H24 3.1975 no . 2_546
H40 C2 3.1800 no . 2_546
H40 C4 3.2896 no . 2_546
H40 C5 3.4158 no . 2_546
H40 C13 3.5300 no . 2_546
H40 C25 3.5254 no . 2_546
H40 H1 2.6228 no . 2_546
H40 H2 3.0683 no . 2_546
H40 H23 3.2361 no . 2_546
H40 H24 2.9594 no . 2_546
H41 C12 3.3359 no . 2_546
H41 C13 2.9796 no . 2_546
H41 C23 3.5597 no . 2_646
H41 C25 3.4092 no . 2_546
H41 H9 3.4012 no . 2_546
H41 H10 2.7910 no . 2_546
H41 H19 2.7374 no . 2_646
H41 H20 3.5762 no . 2_646
H41 H23 2.7481 no . 2_546
H41 H24 3.2654 no . 2_546

#==============================================================================
#     End of CIF
#==============================================================================
